# Supplementary material
Source: PubMed Central journal article supplement (PMC6072309)

## Electronic Supporting Information

### Design, synthesis and biological evaluation of benzimidazole-rhodanine conjugates as potent topoisomerase II inhibitors

Penghui Li<sup>a</sup>, Wenjin Zhang<sup>a</sup>, Hong Jiang<sup>a</sup>, Yongliang Li<sup>a</sup>, Changzhi Dong<sup>a,b</sup>, Huixiong Chen<sup>a,c</sup>, Kun Zhang<sup>a,d</sup>, Zhiyun Du<sup>a\*</sup>

<sup>a</sup>*Institute of Natural Medicine & Green Chemistry, School of Chemical Engineering and Light Industry, Guangdong University of Technology, Guangzhou 510006, China*

<sup>b</sup>*Universite Paris Diderot, Sorbonne Paris Cite, ITODYS, UMR 7086 CNRS, 15 rue J-A de Baif, 75270 Cedex 13 Paris, France*

<sup>c</sup>*CNRS, UMR8601, Laboratoire de Chimie et Biochimie Pharmacologiques et Toxicologiques, CBNIT, Universite Paris Descartes PRES Sorbonne Paris Cite, UFR Biomedicale, 45 rue des Saints-Peres, 75270 Cedex 06 Paris, France.*

<sup>d</sup>*Wuyi University, Jiangmen529020, China.*

#### Table of contents

|                                                                                 |         |
|---------------------------------------------------------------------------------|---------|
| ❖ Electronic Supporting Information .....                                       | S1      |
| ❖ <sup>1</sup> H NMR and 2D NOESY Spectrum of Compound <b>3a</b> .....          | S2      |
| ❖ <sup>1</sup> H NMR and 2D NOESY Spectrum of Compound <b>3b</b> .....          | S3      |
| ❖ Chemistry .....                                                               | S4-S17  |
| ❖ <sup>1</sup> H NMR and <sup>13</sup> C NMR Spectrum of Target Compounds ..... | S18-S52 |

### <sup>1</sup>H NMR and 2D NOESY (DMSO-*d*<sub>6</sub>) Spectrum of Compound 3a

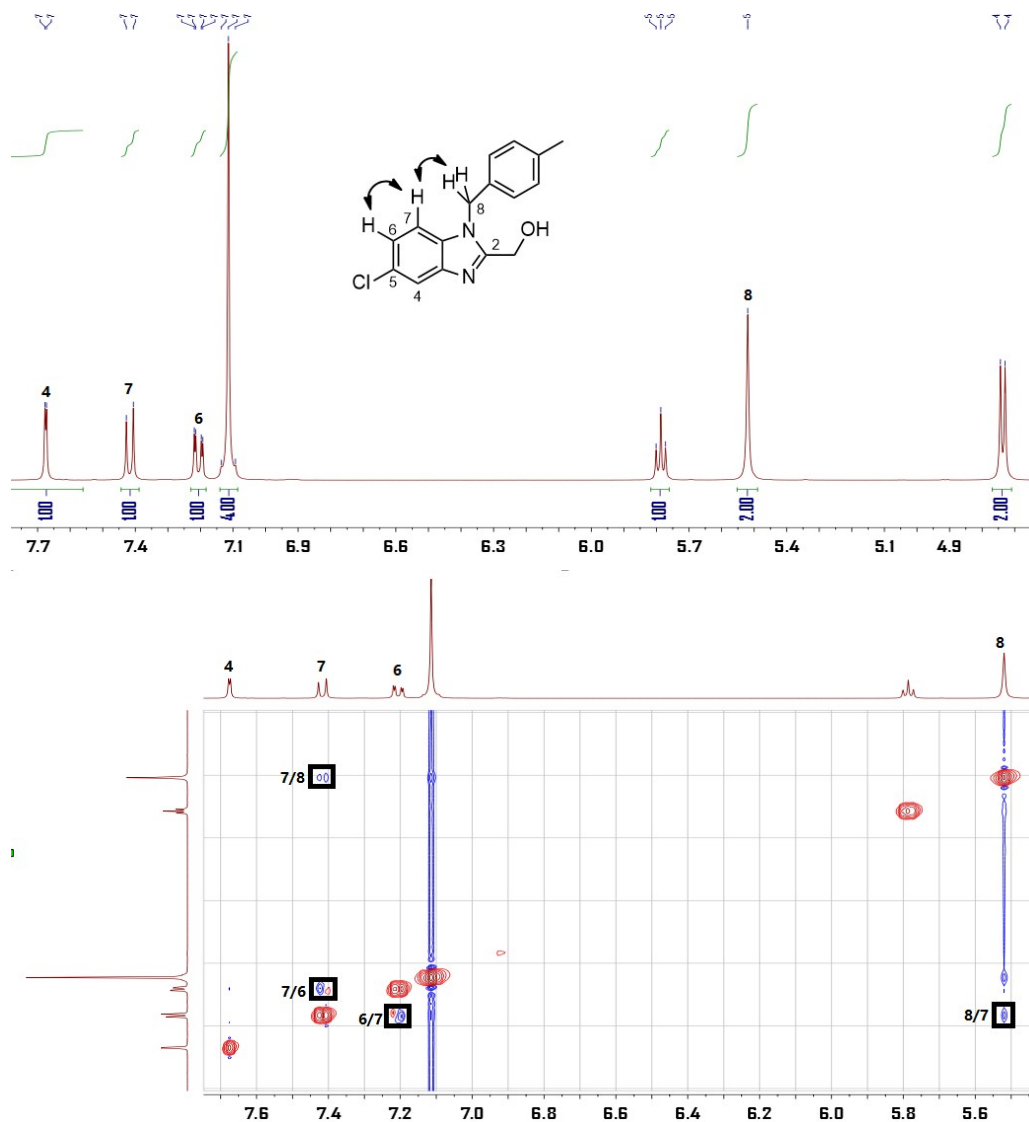

Fig. S1. <sup>1</sup>H NMR (upper) and 2D NOESY analysis of **3a**. The protons on the aromatic ring (6-H, 7-H, and 8-H) are easily assigned on the basis of 2D NOESY relations.

### $^1\text{H}$ NMR and 2D NOESY ( $\text{DMSO}-d_6$ ) Spectrum of Compound **3b**

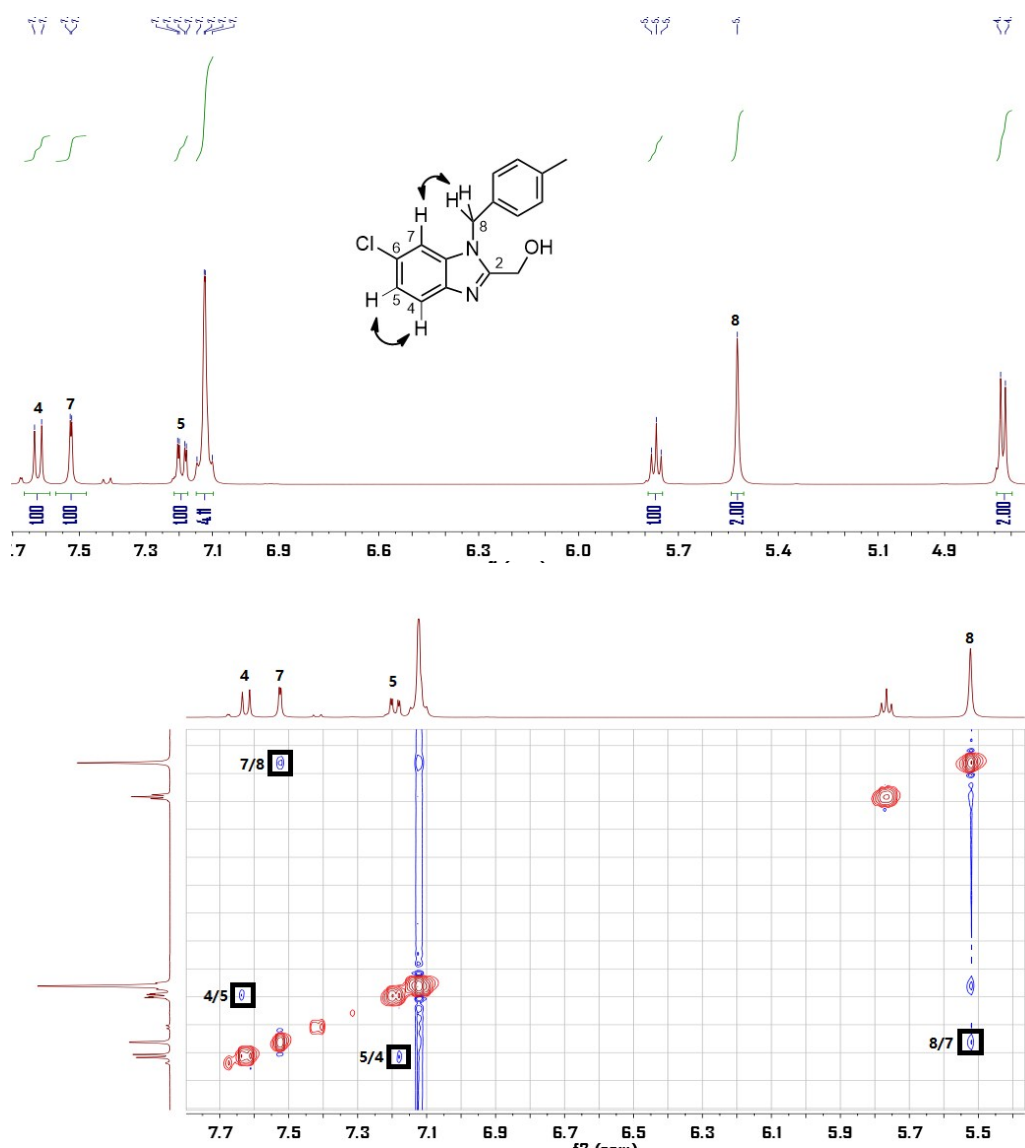

Fig. S2.  $^1\text{H}$  NMR and 2D NOESY analysis of **3b**. The protons on the aromatic ring (4-H, 5-H, 7-H, and 8-H) are easily assigned on the basis of 2D NOESY relations.

## Chemistry

### General method for the synthesis of 1a–1d

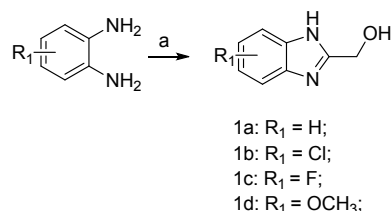

The mixture of a substituted benzene-1,2-diamine (10 mmol) and glycolic acid (30 mmol) in HCl (4 N, 30 mL) was heated to reflux at 100 °C for 6 h and the reaction was quenched with saturated aqueous sodium bicarbonate. The white solid were collected by filtration. They were used directly without further purification.

### General method for the synthesis of 2a–2s, 3a–3f, and 4a–4g

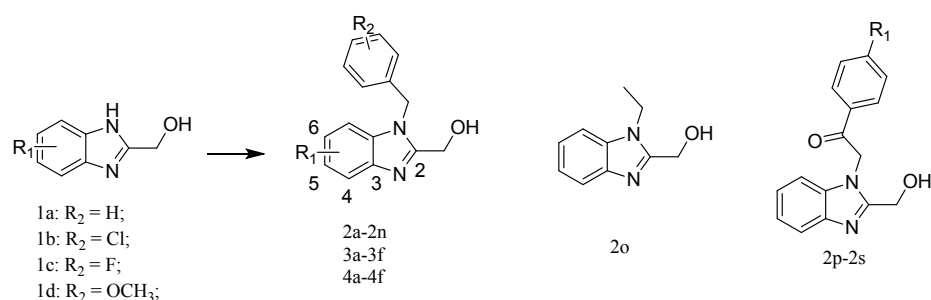

- |                                                                                                    |                                                                                        |                                                   |
|----------------------------------------------------------------------------------------------------|----------------------------------------------------------------------------------------|---------------------------------------------------|
| 2a: R <sub>1</sub> = H, R <sub>2</sub> = <i>p</i> -Br;                                             | 3a: R <sub>1</sub> = 5-Cl, R <sub>2</sub> = <i>p</i> -CH <sub>3</sub> ;                | 2p: R <sub>1</sub> = <i>p</i> -F;                 |
| 2b: R <sub>1</sub> = H, R <sub>2</sub> = <i>o</i> -F, <i>p</i> -Br;                                | 3b: R <sub>1</sub> = 6-Cl, R <sub>2</sub> = <i>p</i> -CH <sub>3</sub> ;                | 2q: R <sub>1</sub> = <i>p</i> -OCH <sub>3</sub> ; |
| 2c: R <sub>1</sub> = H, R <sub>2</sub> = <i>p</i> -CN;                                             | 3c: R <sub>1</sub> = 5-F, R <sub>2</sub> = <i>p</i> -CH <sub>3</sub> ;                 | 2r: R <sub>1</sub> = <i>p</i> -Cl;                |
| 2d: R <sub>1</sub> = H, R <sub>2</sub> = <i>p</i> -NO <sub>2</sub> ;                               | 3d: R <sub>1</sub> = 6-F, R <sub>2</sub> = <i>p</i> -CH <sub>3</sub> ;                 | 2s: R <sub>1</sub> = <i>p</i> -CH <sub>3</sub> ;  |
| 2e: R <sub>1</sub> = H, R <sub>2</sub> = <i>p</i> -F;                                              | 3e: R <sub>1</sub> = 5-OCH <sub>3</sub> , R <sub>2</sub> = <i>p</i> -CH <sub>3</sub> ; |                                                   |
| 2f: R <sub>1</sub> = H, R <sub>2</sub> = H;                                                        | 3f: R <sub>1</sub> = 6-OCH <sub>3</sub> , R <sub>2</sub> = <i>p</i> -CH <sub>3</sub> ; |                                                   |
| 2g: R <sub>1</sub> = H, R <sub>2</sub> = <i>p</i> -CH <sub>3</sub> ;                               | 4a: R <sub>1</sub> = 5-Cl, R <sub>2</sub> = <i>o</i> -F;                               |                                                   |
| 2h: R <sub>1</sub> = H, R <sub>2</sub> = <i>p</i> -Cl;                                             | 4b: R <sub>1</sub> = 6-Cl, R <sub>2</sub> = <i>o</i> -F;                               |                                                   |
| 2i: R <sub>1</sub> = H, R <sub>2</sub> = <i>p</i> -CF <sub>3</sub> ;                               | 4c: R <sub>1</sub> = 5-F, R <sub>2</sub> = <i>o</i> -F;                                |                                                   |
| 2j: R <sub>1</sub> = H, R <sub>2</sub> = <i>o</i> -F;                                              | 4d: R <sub>1</sub> = 6-F, R <sub>2</sub> = <i>o</i> -F;                                |                                                   |
| 2k: R <sub>1</sub> = H, R <sub>2</sub> = <i>o</i> -F; <i>p</i> -F;                                 | 4e: R <sub>1</sub> = 5-OCH <sub>3</sub> , R <sub>2</sub> = <i>o</i> -F;                |                                                   |
| 2l: R <sub>1</sub> = H, R <sub>2</sub> = <i>m</i> -F;                                              | 4f: R <sub>1</sub> = 6-OCH <sub>3</sub> , R <sub>2</sub> = <i>o</i> -F;                |                                                   |
| 2m: R <sub>1</sub> = H, R <sub>2</sub> = <i>m</i> -F; <i>p</i> -F;                                 |                                                                                        |                                                   |
| 2n: R <sub>1</sub> = H, R <sub>2</sub> = <i>m</i> -OCH <sub>3</sub> ; <i>m</i> -OCH <sub>3</sub> ; |                                                                                        |                                                   |

The solution of a **1a–1d** (1 mmol) in DMF (2 mL) were added the appropriate benzyl bromide (2 mmol) and K<sub>2</sub>CO<sub>3</sub> (5 mmol), and the reaction mixture was stirred at room temperature for 8 h. It was then diluted with DCM (8 mL) and H<sub>2</sub>O (8 mL). The organic layer

was separated, and the aqueous layer was extracted with DCM (8 mL × 2). The combined organic layers were dried over Mg<sub>2</sub>SO<sub>4</sub> and concentrated *in vacuo* to provide a crude product, which was purified by PTLC (DCM/ MeOH =100/5, v/v) to yield the title compound.

***(1-(4-Bromobenzyl)-1H-benzo[d]imidazol-2-yl)methanol (2a)***

1-Bromo-4-(bromomethyl) benzene and **1a** were used as reactants to give **2a**. While solid, Yield: 76%. <sup>1</sup>H NMR (400 MHz, CDCl<sub>3</sub>) δ 7.69 (d, *J* = 7.9 Hz, 1H), 7.39 (d, *J* = 8.3 Hz, 2H), 7.26 – 7.19 (m, 2H), 7.16 (d, *J* = 7.7 Hz, 1H), 6.97 (d, *J* = 8.2 Hz, 2H), 5.41 (s, 2H), 4.86 (s, 2H).

***(1-(4-Bromo-2-fluorobenzyl)-1H-benzo[d]imidazol-2-yl)methanol (2b)***

4-Bromo-1-(bromomethyl)-2-fluorobenzene and **1a** were used as reactants to give **2b**. While solid. Yield: 83%. <sup>1</sup>H NMR (400 MHz, CDCl<sub>3</sub>) δ 7.71 (d, *J* = 7.7 Hz, 1H), 7.30 (d, *J* = 9.7 Hz, 1H), 7.26 – 7.15 (m, 3H), 7.10 (d, *J* = 8.2 Hz, 1H), 7.03 – 6.95 (m, 1H), 5.45 (s, 2H), 4.91 (s, 2H).

***4-((2-(Hydroxymethyl)-1H-benzo[d]imidazol-1-yl)methyl)benzotrile (2c)***

4-(Bromomethyl)benzotrile and **1a** were used as reactants to give **2c**. While solid. Yield: 71%. <sup>1</sup>H NMR (400 MHz, CDCl<sub>3</sub>) δ 7.68 (d, *J* = 7.7 Hz, 1H), 7.54 (d, *J* = 8.0 Hz, 2H), 7.28 (d, *J* = 7.3 Hz, 1H), 7.22 (d, *J* = 7.4 Hz, 1H), 7.18 (d, *J* = 8.0 Hz, 2H), 7.11 (d, *J* = 7.8 Hz, 1H), 5.55 (s, 2H), 4.89 (s, 2H).

***(1-(4-Nitrobenzyl)-1H-benzo[d]imidazol-2-yl)methanol (2d)***

1-(Bromomethyl)-4-nitrobenzene and **1a** were used as reactants to give **2d**. While solid. Yield: 66%. <sup>1</sup>H NMR (400 MHz, CDCl<sub>3</sub>) δ 8.12 (d, *J* = 8.5 Hz, 2H), 7.70 (d, *J* = 7.7 Hz, 1H), 7.29 (d, *J* = 7.1 Hz, 1H), 7.27 – 7.21 (m, 3H), 7.12 (d, *J* = 7.8 Hz, 1H), 5.60 (s, 2H), 4.91 (s, 2H).

***(1-(4-Fluorobenzyl)-1H-benzo[d]imidazol-2-yl)methanol (2e)***

1-(Bromomethyl)-4-fluorobenzene and **1a** were used as reactants to give **2e**. While solid.

Yield: 87%. <sup>1</sup>H NMR (400 MHz, CDCl<sub>3</sub>) δ 7.71 (d, *J* = 7.8 Hz, 1H), 7.25–7.19 (m, 3H), 7.12 – 7.06 (m, 2H), 7.00 – 6.92 (m, 2H), 5.42 (s, 2H), 4.87 (s, 2H).

***(1-benzyl-1H-benzo[d]imidazol-2-yl)methanol (2f)***

(Bromomethyl)benzene and **1a** were used as reactants to give **2f**. While solid. Yield: 69%. <sup>1</sup>H

NMR (400 MHz, CDCl<sub>3</sub>) δ 7.72 (d, *J* = 7.6 Hz, 1H), 7.32 – 7.22 (m, 6H), 7.13 – 7.07 (m, 2H), 5.45 (s, 2H), 4.87 (s, 2H).

***(1-(4-Methylbenzyl)-1H-benzo[d]imidazol-2-yl)methanol (2g)***

1-(Bromomethyl)-4-methylbenzene and **1a** were used as reactants to give **2g**. While solid.

Yield: 73%. <sup>1</sup>H NMR (400 MHz, CDCl<sub>3</sub>) δ 7.72 (d, *J* = 8.1 Hz, 1H), 7.25 – 7.19 (m, 3H), 7.09 (d, *J* = 7.7 Hz, 2H), 6.99 (d, *J* = 7.7 Hz, 2H), 5.40 (s, 2H), 4.87 (s, 2H), 2.30 (s, 3H).

***(1-(4-Chlorobenzyl)-1H-benzo[d]imidazol-2-yl)methanol (2h)***

1-(Bromomethyl)-4-chlorobenzene and **1a** were used as reactants to give **2h**. While solid.

Yield: 84%. <sup>1</sup>H NMR (400 MHz, CDCl<sub>3</sub>) δ 7.70 (d, *J* = 7.6 Hz, 1H), 7.29 – 7.25 (d, *J* = 8.2 Hz, 3H), 7.21 (d, *J* = 7.4 Hz, 1H), 7.17 (d, *J* = 7.6 Hz, 1H), 7.03 (d, *J* = 8.1 Hz, 2H), 5.43 (s, 2H), 4.87 (s, 2H).

***(1-(4-(Trifluoromethyl)benzyl)-1H-benzo[d]imidazol-2-yl)methanol (2i)***

1-(Bromomethyl)-4-(trifluoromethyl)benzene and **1a** were used as reactants to give **2j**. While

solid. Yield: 86%. <sup>1</sup>H NMR (400 MHz, CDCl<sub>3</sub>) δ 7.71 (d, *J* = 7.7 Hz, 1H), 7.53 (d, *J* = 8.0 Hz, 2H), 7.28 (d, *J* = 7.2 Hz, 1H), 7.23 (d, 1H), 7.20 (d, *J* = 8.2 Hz, 2H), 7.16 (d, *J* = 7.7 Hz, 1H), 5.54 (s, 2H), 4.90 (s, 2H).

***(1-(2-Fluorobenzyl)-1H-benzo[d]imidazol-2-yl)methanol (2j)***

1-(Bromomethyl)-2-fluorobenzene and **1a** were used as reactants to give **2j**. While solid. Yield: 77%. <sup>1</sup>H NMR (400 MHz, CDCl<sub>3</sub>) δ 7.71 (d, *J* = 7.3 Hz, 1H), 7.30 – 7.22 (m, 3H), 7.10 (d, *J* = 9.2 Hz, 1H), 6.98 (d, *J* = 7.4 Hz, 1H), 6.84 (d, *J* = 7.4 Hz, 1H), 5.50 (s, 2H), 4.92 (s, 2H).

***(1-(2,4-Difluorobenzyl)-1H-benzo[d]imidazol-2-yl)methanol (2k)***

1-(Bromomethyl)-2,4-difluorobenzene and **1a** were used as reactants to give **2k**. While solid. Yield: 71%. <sup>1</sup>H NMR (400 MHz, CDCl<sub>3</sub>) δ 7.70 (d, *J* = 7.6 Hz, 1H), 7.26 – 7.16 (m, 3H), 6.90 – 6.82 (m, 2H), 6.70 (d, *J* = 8.3 Hz, 1H), 5.46 (s, 2H), 4.92 (s, 2H).

***(1-(3-Fluorobenzyl)-1H-benzo[d]imidazol-2-yl)methanol (2l)***

1-(Bromomethyl)-3-fluorobenzene and **1a** were used as reactants to give **2l**. While solid. Yield: 84%. <sup>1</sup>H NMR (400 MHz, CDCl<sub>3</sub>) δ 7.72 (d, *J* = 7.5 Hz, 1H), 7.26–7.18(m, 4H), 6.97 (d, *J* = 8.3 Hz, 1H), 6.89 (d, *J* = 7.6 Hz, 1H), 6.82 (d, *J* = 9.3 Hz, 1H), 5.46 (s, 2H), 4.88 (s, 2H), 4.37 (s, 1H).

***(1-(3,4-Difluorobenzyl)-1H-benzo[d]imidazol-2-yl)methanol (2m)***

4-(Bromomethyl)-1,2-difluorobenzene and **1a** were used as reactants to give **2m**. While solid. Yield: 74%. <sup>1</sup>H NMR (400 MHz, CDCl<sub>3</sub>) δ 7.70 (d, *J* = 7.7 Hz, 1H), 7.26 – 7.20 (m, 2H), 7.16 (d, *J* = 7.5 Hz, 1H), 7.11–7.05 (m, 1H), 7.01 – 6.93 (m, 1H), 6.86 (d, *J* = 6.6 Hz, 1H), 5.42 (s, 2H), 4.88 (s, 2H).

***(1-(3,5-Dimethoxybenzyl)-1H-benzo[d]imidazol-2-yl)methanol (2n)***

1-(Bromomethyl)-3,5-dimethoxybenzene and **1a** were used as reactants to give **2n**. While solid. Yield: 85%. <sup>1</sup>H NMR (400 MHz, CDCl<sub>3</sub>) δ 7.72 (d, *J* = 7.8 Hz, 1H), 7.22 (d, *J* = 14.1 Hz, 3H), 6.35 (s, 1H), 6.25 (s, 2H), 5.37 (s, 2H), 4.87 (s, 2H), 3.69 (s, 6H).

***(1-Ethyl-1H-benzo[d]imidazol-2-yl)methanol (2o)***

Bromoethane and **1a** were used as reactants to give **2o**. <sup>1</sup>H NMR (400 MHz, CDCl<sub>3</sub>-d<sub>6</sub>) δ 7.68 (d, *J* = 6.7, 2.2 Hz, 1H), 7.32 (d, *J* = 6.7, 2.1 Hz, 1H), 7.28 – 7.21 (m, 2H), 4.88 (s, 2H), 4.29 (q, *J* = 7.3 Hz, 2H), 1.46 (t, *J* = 7.3 Hz, 3H).

***1-(4-Fluorophenyl)-2-(2-(hydroxymethyl)-1H-benzo[d]imidazol-1-yl)ethanone (2p)***

2-Bromo-1-(4-fluorophenyl)ethanone and **1a** were used as reactants to give **2p**. While solid. Yield: 77%. <sup>1</sup>H NMR (400 MHz, CDCl<sub>3</sub>) δ 8.12–8.02 (dd, *J* = 8.6, 5.3 Hz, 2H), 7.72 – 7.67 (m, 1H), 7.25 – 7.19 (m, 4H), 7.12 – 7.08 (m, 1H), 5.65 (s, 2H), 4.80 (s, 2H).

***2-(2-(hydroxymethyl)-1H-benzo[d]imidazol-1-yl)-1-(4-methoxyphenyl)ethanone(2q)***

2-Bromo-1-(4-methoxyphenyl)ethanone and **1a** were used as reactants to give **2q**. While solid. Yield: 88%. <sup>1</sup>H NMR (400 MHz, CDCl<sub>3</sub>) δ 8.01 (d, *J* = 8.8 Hz, 2H), 7.72 (dd, *J* = 6.3, 2.2 Hz, 1H), 7.26 – 7.20 (m, 2H), 7.12 (dd, *J* = 6.4, 2.4 Hz, 1H), 7.01 (d, *J* = 8.9 Hz, 2H), 5.64 (s, 2H), 4.83 (s, 2H), 3.91 (s, 3H).

***1-(4-chlorophenyl)-2-(2-(hydroxymethyl)-1H-benzo[d]imidazol-1-yl)ethanone (2r)***

2-Bromo-1-(4-chlorophenyl)ethanone and **1a** were used as reactants to give **2r**. While solid. Yield: 81%. <sup>1</sup>H NMR (400 MHz, CDCl<sub>3</sub>) δ 7.96 (d, *J* = 8.5 Hz, 2H), 7.70 (d, *J* = 8.6 Hz, 1H), 7.51 (s, 2H), 7.26 – 7.22 (m, 2H), 7.12 – 7.09 (m, 1H), 5.65 (s, 2H), 4.81 (s, 2H).

***2-(2-(Hydroxymethyl)-1H-benzo[d]imidazol-1-yl)-1-(p-tolyl)ethanone (2s)***

2-Bromo-1-(p-tolyl)ethanone and **1a** were used as reactants to give **2s**. While solid. Yield: 75%. <sup>1</sup>H NMR (400 MHz, CDCl<sub>3</sub>) δ 7.93 (d, *J* = 8.1 Hz, 2H), 7.71 (d, *J* = 7.9 Hz, 1H), 7.34 (d, *J* = 8.0 Hz, 2H), 7.25 – 7.20 (m, 2H), 7.13 – 7.09 (m, 1H), 5.66 (s, 2H), 4.81 (s, 2H), 2.46 (s, 3H).

***(5 or 6-Chloro-1-(4-methylbenzyl)-1H-benzo[d]imidazol-2-yl)methanol (3a and 3b)***



1-(Bromomethyl)-4-methylbenzene and **1b** were used as reactants to give **3a** and **3b**. For **3a**: while solid. Yield: 36%. <sup>1</sup>H NMR (400 MHz, CDCl<sub>3</sub>) δ 7.67 (d, *J* = 1.3 Hz, 1H), 7.21–7.09 (m, 4H), 6.98 (d, *J* = 8.0 Hz, 2H), 5.40 (s, 2H), 4.88 (s, 2H), 2.31 (s, 3H). For **3b**: while solid. Yield: 41%. <sup>1</sup>H NMR (400 MHz, CDCl<sub>3</sub>) δ 7.61 (d, *J* = 9.3 Hz, 1H), 7.23 – 7.19 (m, 2H), 7.10 (d, *J* = 7.9 Hz, 2H), 6.97 (d, *J* = 8.0 Hz, 2H), 5.35 (s, 2H), 4.85 (s, 2H), 2.32 (s, 3H).

***(5 or 6-Fluoro-1-(4-methylbenzyl)-1H-benzo[d]imidazol-2-yl)methanol (3c and 3d)***

1-(Bromomethyl)-4-methylbenzene and **1c** were used as reactants to give **3c** and **3d**. For **3c**: while solid. Yield: 33%. <sup>1</sup>H NMR (400 MHz, CDCl<sub>3</sub>) δ 7.42 – 7.30 (m, 1H), 7.12 – 7.08 (m, 3H), 7.02 – 6.94 (dd, *J* = 8.0, 3.7 Hz, 3H), 5.39 (s, 2H), 4.86 (s, 2H), 2.31 (s, 3H). For **3d**: while solid. Yield: 27%. <sup>1</sup>H NMR (400 MHz, CDCl<sub>3</sub>) δ 7.68 – 7.60 (m, 1H), 7.10 (d, *J* = 8.0 Hz, 2H), 6.99 (d, *J* = 8.2 Hz, 3H), 6.92 – 6.84 (m, 1H), 5.36 (s, 2H), 4.86 (s, 2H), 2.31 (s, 3H).

***(5 or 6-Methoxy-1-(4-methylbenzyl)-1H-benzo[d]imidazol-2-yl)methanol (3e and 3f)***

1-(Bromomethyl)-4-methylbenzene and **1d** were used as reactants to give **3e** and **3f**. For **3e**: while solid. Yield: 42%. <sup>1</sup>H NMR (400 MHz, CDCl<sub>3</sub>) δ 7.17 (d, *J* = 2.1 Hz, 1H), 7.12 – 7.04 (m, 3H), 6.98 (d, *J* = 8.0 Hz, 2H), 6.91 – 6.83 (m, 1H), 5.38 (s, 2H), 4.85 (s, 2H), 3.82 (s, 3H), 2.30 (s, 3H). For **3f**: while solid. Yield: 38%. <sup>1</sup>H NMR (400 MHz, CDCl<sub>3</sub>) δ 7.58 (d, *J* = 8.8 Hz, 1H), 7.09 (d, *J* = 7.9 Hz, 2H), 6.99 (d, *J* = 8.0 Hz, 2H), 6.87 (dd, *J* = 8.7, 2.2 Hz, 1H), 6.65 (d, *J* = 2.1 Hz, 1H), 5.36 (s, 2H), 4.82 (s, 2H), 3.77 (s, 3H), 2.30 (s, 3H).

***(5 or 6-Chloro-1-(2-fluorobenzyl)-1H-benzo[d]imidazol-2-yl)methanol (4a and 4b)***

1-(Bromomethyl)-2-fluorobenzene and **1b** were used as reactants to give **4a** and **4b**. For **4a**: while solid. Yield: 37%. <sup>1</sup>H NMR (400 MHz, CDCl<sub>3</sub>) δ 7.66 (s, 1H), 7.32 – 7.27 (m, 1H), 7.21 – 7.15 (m, 1H), 7.18 – 7.06 (m, 2H), 7.02 (t, *J* = 7.5 Hz, 1H), 6.87 (t, *J* = 7.1 Hz, 1H), 5.49 (s,

2H), 4.92 (s, 2H). For **4b**: while solid. Yield: 29%. <sup>1</sup>H NMR (400 MHz, CDCl<sub>3</sub>) δ 7.61 (d, *J* = 8.3 Hz, 1H), 7.33 – 7.27 (m, 1H), 7.25 – 7.20 (m, 2H), 7.14 – 7.09 (m, 1H), 7.03 (t, *J* = 7.5 Hz, 1H), 6.85 (t, *J* = 7.2 Hz, 1H), 5.46 (s, 2H), 4.90 (s, 2H).

***(5 or 6-fluoro-1-(2-fluorobenzyl)-1H-benzo[d]imidazol-2-yl)methanol(4c and 4d)***

1-(Bromomethyl)-2-fluorobenzene and **1c** were used as reactants to give **4c** and **4d**. For **4c**: while solid. Yield: 42%. <sup>1</sup>H NMR (400 MHz, CDCl<sub>3</sub>) δ 7.41 – 7.33 (m, 1H), 7.32 – 7.27 (m, 1H), 7.17 – 7.08 (m, 2H), 7.04 – 6.94 (m, 2H), 6.87 (t, *J* = 7.6 Hz, 1H), 5.49 (s, 2H), 4.92 (s, 2H). For **4d**: while solid. Yield: 38%. <sup>1</sup>H NMR (400 MHz, CDCl<sub>3</sub>) δ 7.63 (d, *J* = 8.7, 4.7 Hz, 1H), 7.35 – 7.29 (m, 1H), 7.14 – 7.08 (m, 1H), 7.03 (t, *J* = 5.1 Hz, 1H), 7.01 – 6.95 (m, 1H), 6.94 – 6.86 (m, 2H), 5.46 (s, 2H), 4.91 (s, 2H).

***(1-(2-Fluorobenzyl)-5 or 6-methoxy-1H-benzo[d]imidazol-2-yl)methanol (4e and 4f)***

1-(Bromomethyl)-2-fluorobenzene and **1d** were used as reactants to give **4e** and **4f**. For **4e**: while solid. Yield: 34%. <sup>1</sup>H NMR (400 MHz, CDCl<sub>3</sub>) δ 7.26 – 7.22 (m, 1H), 7.18 (d, *J* = 2.3 Hz, 1H), 7.12 – 7.07 (m, 2H), 6.97 (t, *J* = 7.5 Hz, 1H), 6.87 – 6.80 (m, 2H), 5.47 (s, 2H), 4.89 (s, 2H), 3.83 (s, 3H). For **4f**: while solid. Yield: 40%. <sup>1</sup>H NMR (400 MHz, CDCl<sub>3</sub>) δ 7.58 (d, *J* = 8.8 Hz, 1H), 7.30 – 7.26 (m, 1H), 7.13 – 7.08 (m, 1H), 7.00 (t, *J* = 7.5 Hz, 1H), 6.89 – 6.83 (m, 2H), 6.65 (d, *J* = 2.2 Hz, 1H), 5.46 (s, 2H), 4.88 (s, 2H), 3.78 (s, 3H).

***General method for the synthesis of 5a–5s, 6a–6f, and 7a–7g***

To a solution of **2a–2s**, **3a–3f**, or **4a–4f** (1 mmol) in DCM (10 mL) was added Dess-Martin reagent (1.1 mmol), and the reaction was stirred at 4 °C for 1 h. The reaction was quenched with a saturated aqueous sodium thiosulfate solution (3 mL) and subsequent mixture was extracted with DCM (10 mL × 3). The combined organic extracts were dried over Mg<sub>2</sub>SO<sub>4</sub>

and concentrated. The crude product obtained was purified by PTLC (DCM/MeOH = 100/5, v/v) to yield the title products.

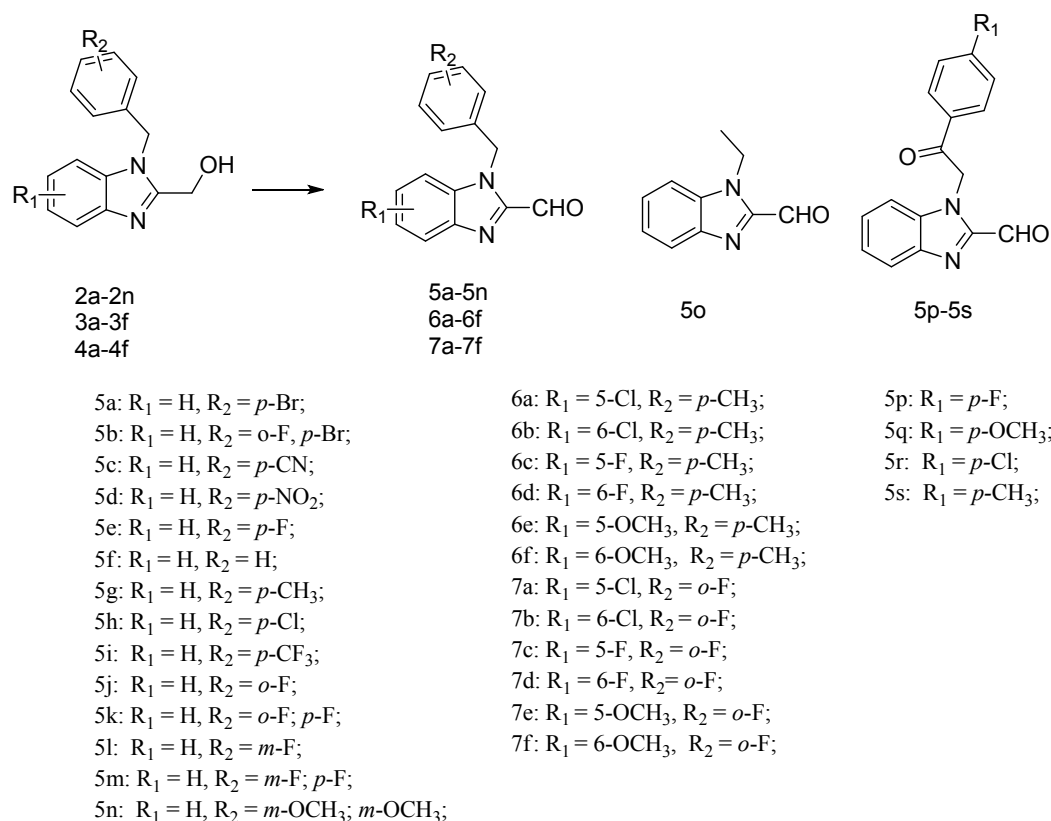

#### **1-(4-Bromobenzyl)-1H-benzo[d]imidazole-2-carbaldehyde (5a)**

Compound **2a** was used as reactant to give **5a**. While solid. Yield: 48%. <sup>1</sup>H NMR (400 MHz, CDCl<sub>3</sub>) δ 10.14 (s, 1H), 7.97 (d, *J* = 7.7 Hz, 1H), 7.49 – 7.39 (m, 5H), 7.04 (d, *J* = 8.1 Hz, 2H), 5.80 (s, 2H).

#### **1-(4-Bromo-2-fluorobenzyl)-1H-benzo[d]imidazole-2-carbaldehyde (5b)**

Compound **2b** was used as reactant to give **5b**. While solid. Yield: 53%. <sup>1</sup>H NMR (400 MHz, CDCl<sub>3</sub>) δ 10.15 (s, 1H), 7.96 (d, *J* = 7.9 Hz, 1H), 7.50 – 7.39 (m, 3H), 7.31 – 7.27 (m, 1H), 7.22 – 7.16 (m, 1H), 6.80 (t, *J* = 8.1 Hz, 1H), 5.87 (s, 2H).

#### **4-((2-Formyl-1H-benzo[d]imidazol-1-yl)methyl)benzotrile(5c)**

Compound **2c** was used as reactant to give **5c**. While solid. Yield: 52%. <sup>1</sup>H NMR (400 MHz,

CDCl<sub>3</sub>)  $\delta$  10.12 (s, 1H), 7.99 (d,  $J$  = 8.0 Hz, 1H), 7.60 (d,  $J$  = 8.1 Hz, 2H), 7.51 – 7.42 (m, 2H), 7.40 (d,  $J$  = 7.9 Hz, 1H), 7.24 (d,  $J$  = 8.0 Hz, 2H), 5.90 (s, 2H).

***1-(4-Nitrobenzyl)-1H-benzod[imidazole]-2-carbaldehyde (5d)***

Compound **2d** was used as reactant to give **5d**. While solid. Yield: 47%. <sup>1</sup>H NMR (400 MHz, CDCl<sub>3</sub>)  $\delta$  10.13 (s, 1H), 8.16 (d,  $J$  = 8.4 Hz, 2H), 8.00 (d,  $J$  = 7.9 Hz, 1H), 7.52 – 7.39 (m, 3H), 7.30 (d,  $J$  = 8.3 Hz, 2H), 5.95 (s, 2H).

***1-(4-Fluorobenzyl)-1H-benzod[imidazole]-2-carbaldehyde (5e)***

Compound **2e** was used as reactant to give **5e**. While solid. While solid. Yield: 57%. <sup>1</sup>H NMR (400 MHz, CDCl<sub>3</sub>)  $\delta$  10.14 (s, 1H), 7.96 (d,  $J$  = 8.0 Hz, 1H), 7.50 – 7.38 (m, 3H), 7.21 – 7.13 (m, 2H), 6.98 (t,  $J$  = 8.5 Hz, 2H), 5.82 (s, 2H).

***1-Benzyl-1H-benzod[imidazole]-2-carbaldehyde (5f)***

Compound **2f** was used as reactant to give **5f**. While solid. Yield: 64%. <sup>1</sup>H NMR (400 MHz, CDCl<sub>3</sub>)  $\delta$  10.15 (s, 1H), 7.96 (d,  $J$  = 7.9 Hz, 1H), 7.48 – 7.38 (m, 3H), 7.30 – 7.25 (m, 3H), 7.17 (d,  $J$  = 7.1 Hz, 2H), 5.87 (s, 2H).

***1-(4-Methylbenzyl)-1H-benzod[imidazole]-2-carbaldehyde (5g)***

Compound **2g** was used as reactant to give **5g**. While solid. Yield: 58%. <sup>1</sup>H NMR (400 MHz, CDCl<sub>3</sub>)  $\delta$  10.15 (s, 1H), 7.95 (d,  $J$  = 7.9 Hz, 1H), 7.49 – 7.37 (m, 3H), 7.12 – 7.05 (m, 4H), 5.82 (s, 2H), 2.29 (s, 3H).

***1-(4-Chlorobenzyl)-1H-benzod[imidazole]-2-carbaldehyde (5h)***

Compound **2h** was used as reactant to give **5h**. While solid. Yield: 64%. <sup>1</sup>H NMR (400 MHz, CDCl<sub>3</sub>)  $\delta$  10.14 (s, 1H), 7.96 (d,  $J$  = 7.8 Hz, 1H), 7.49 – 7.39 (m, 3H), 7.27 (d,  $J$  = 5.9 Hz, 2H), 7.11 (d,  $J$  = 8.0 Hz, 2H), 5.82 (s, 2H).

***1-(4-(Trifluoromethyl)benzyl)-1H-benzod[imidazole]-2-carbaldehyde (5i)***

Compound **2i** was used as reactant to give **5i**. While solid. Yield: 55%. <sup>1</sup>H NMR (400 MHz, CDCl<sub>3</sub>) δ 10.14 (s, 1H), 7.98 (d, *J* = 8.0 Hz, 1H), 7.56 (d, *J* = 8.0 Hz, 2H), 7.48 – 7.44 (m, 3H), 7.26 (s, 2H), 5.92 (s, 2H).

***1-(2-Fluorobenzyl)-1H-benzod[imidazole]-2-carbaldehyde (5j)***

Compound **2j** was used as reactant to give **5j**. While solid. Yield: 49%. <sup>1</sup>H NMR (400 MHz, CDCl<sub>3</sub>) δ 10.17 (s, 1H), 7.95 (d, *J* = 7.9 Hz, 1H), 7.50 – 7.38 (m, 3H), 7.25 (d, *J* = 10.5 Hz, 1H), 7.09 (t, *J* = 9.2 Hz, 1H), 7.01 (t, *J* = 7.5 Hz, 1H), 6.91 (t, *J* = 7.5 Hz, 1H), 5.94 (s, 2H).

***1-(2,4-Difluorobenzyl)-1H-benzod[imidazole]-2-carbaldehyde (5k)***

Compound **2k** was used as reactant to give **5k**. While solid. Yield: 67%. <sup>1</sup>H NMR (400 MHz, CDCl<sub>3</sub>) δ 10.16 (s, 1H), 7.96 (d, *J* = 7.5 Hz, 1H), 7.51 – 7.39 (m, 3H), 6.99 – 6.95 (m, 1H), 6.85 (t, *J* = 8.0 Hz, 1H), 6.76 (t, *J* = 7.1 Hz, 1H), 5.88 (s, 2H).

***1-(3-Fluorobenzyl)-1H-benzod[imidazole]-2-carbaldehyde (5l)***

Compound **2l** was used as reactant to give **5l**. While solid. Yield: 55%. <sup>1</sup>H NMR (400 MHz, CDCl<sub>3</sub>) δ 10.16 (s, 1H), 7.98 (d, *J* = 7.5 Hz, 1H), 7.50 – 7.39 (m, 3H), 7.29 – 7.26 (m, 1H), 6.96 (t, *J* = 8.8 Hz, 2H), 6.85 (d, *J* = 9.4 Hz, 1H), 5.85 (s, 2H).

***1-(3,4-Difluorobenzyl)-1H-benzod[imidazole]-2-carbaldehyde (5m)***

Compound **2m** was used as reactant to give **5m**. While solid. Yield: 46%. <sup>1</sup>H NMR (400 MHz, CDCl<sub>3</sub>) δ 10.14 (s, 1H), 7.98 (d, *J* = 8.4 Hz, 1H), 7.51 – 7.41 (m, 3H), 7.13 – 7.05 (m, 1H), 7.03 – 6.97 (m, 1H), 6.93 (m, 1H), 5.80 (s, 2H).

***1-(3,5-Dimethoxybenzyl)-1H-benzod[imidazole]-2-carbaldehyde (5n)***

Compound **2n** was used as reactant to give **5n**. While solid. Yield: 49%. <sup>1</sup>H NMR (400 MHz, CDCl<sub>3</sub>) δ 10.07 (s, 1H), 7.91 (d, *J* = 8.1 Hz, 1H), 7.75 (d, *J* = 8.3 Hz, 1H), 7.48 (t, *J* = 7.6 Hz, 1H), 7.40 (t, *J* = 7.6 Hz, 1H), 6.40 (s, 1H), 6.32 (s, 2H), 5.81 (s, 2H), 3.67 (s, 6H).

***1-Ethyl-1H-benzo[d]imidazole-2-carbaldehyde (5o)***

Compound **2o** was used as reactant to give **5o**. While solid. Yield: 42%. <sup>1</sup>H NMR (400 MHz, CDCl<sub>3</sub>) δ 10.13 (s, 1H), 7.94 (d, *J* = 8.3 Hz, 1H), 7.55 – 7.45 (m, 2H), 7.46 – 7.34 (m, 1H), 4.67 (q, *J* = 7.2 Hz, 2H), 1.46 (t, *J* = 7.2 Hz, 3H).

***1-(2-(4-Fluorophenyl)-2-oxoethyl)-1H-benzo[d]imidazole-2-carbaldehyde (5p)***

Compound **2p** was used as reactant to give **5p**. While solid. Yield: 55%. <sup>1</sup>H NMR (400 MHz, CDCl<sub>3</sub>) δ 10.09 (s, 1H), 8.14 – 8.06 (m, *J* = 7.0, 5.0, 2.4 Hz, 2H), 8.00 (d, *J* = 7.6 Hz, 1H), 7.50 – 7.40 (m, 2H), 7.32 (d, *J* = 7.9 Hz, 1H), 7.26 – 7.21 (m, 2H), 6.03 (s, 2H).

***1-(2-(4-methoxyphenyl)-2-oxoethyl)-1H-benzo[d]imidazole-2-carbaldehyde (5q)***

Compound **2q** was used as reactant to give **5q**. While solid. Yield: 59%. <sup>1</sup>H NMR (400 MHz, CDCl<sub>3</sub>) δ 10.09 (s, 1H), 8.03 (d, *J* = 8.8 Hz, 2H), 7.98 (d, *J* = 7.8 Hz, 1H), 7.48 – 7.39 (m, 2H), 7.32 (d, *J* = 8.1 Hz, 1H), 7.03 (d, *J* = 8.8 Hz, 2H), 6.03 (s, 2H), 3.92 (s, 3H).

***1-(2-(4-Chlorophenyl)-2-oxoethyl)-1H-benzo[d]imidazole-2-carbaldehyde (5r)***

Compound **2r** was used as reactant to give **5r**. While solid. Yield: 63%. <sup>1</sup>H NMR (400 MHz, CDCl<sub>3</sub>) δ 10.08 (s, 1H), 7.99 (d, *J* = 8.6 Hz, 3H), 7.54 (d, *J* = 8.5 Hz, 2H), 7.49 – 7.41 (m, 2H), 7.32 (d, *J* = 7.9 Hz, 1H), 6.02 (s, 2H).

***1-(2-Oxo-2-(p-tolyl)ethyl)-1H-benzo[d]imidazole-2-carbaldehyde (5s)***

Compound **2s** was used as reactant to give **5s**. While solid. Yield: 49%. <sup>1</sup>H NMR (400 MHz, CDCl<sub>3</sub>) δ 10.10 (s, 1H), 7.99 – 7.95 (m, 3H), 7.50 – 7.38 (m, 3H), 7.38 – 7.30 (m, 3H), 6.05 (s, 2H), 2.47 (s, 3H).

**5-Chloro-1-(4-methylbenzyl)-1H-benzo[d]imidazole-2-carbaldehyde (6a)**

Compound **3a** was used as reactant to give **6a**. While solid. Yield: 57%. <sup>1</sup>H NMR (400 MHz, CDCl<sub>3</sub>) δ 10.13 (s, 1H), 7.92 (s, 1H), 7.38 (s, 2H), 7.10 (d, *J* = 8.0 Hz, 2H), 7.04 (d, *J* = 8.1 Hz, 2H), 5.80 (s, 2H), 2.30 (s, 3H).

**6-Chloro-1-(4-methylbenzyl)-1H-benzo[d]imidazole-2-carbaldehyde (6b)**

Compound **3b** was used as reactant to give **6b**. While solid. Yield: 39%. <sup>1</sup>H NMR (400 MHz, CDCl<sub>3</sub>) δ 10.12 (s, 1H), 7.86 (d, *J* = 8.8 Hz, 1H), 7.45 (d, *J* = 1.6 Hz, 1H), 7.39 – 7.31 (m, 1H), 7.11 (d, *J* = 8.0 Hz, 2H), 7.05 (d, *J* = 8.0 Hz, 2H), 5.77 (s, 2H), 2.31 (s, 3H).

**5-Fluoro-1-(4-methylbenzyl)-1H-benzo[d]imidazole-2-carbaldehyde (6c)**

Compound **3c** was used as reactant to give **6c**. While solid. Yield: 45%. <sup>1</sup>H NMR (400 MHz, CDCl<sub>3</sub>) δ 10.13 (s, 1H), 7.61 – 7.67 (m, 1H), 7.41 – 7.35 (m, 1H), 7.26 – 7.18 (m, 1H), 7.10 (d, *J* = 8.0 Hz, 2H), 7.05 (d, *J* = 8.1 Hz, 2H), 5.81 (s, 2H), 2.30 (s, 3H).

**6-Fluoro-1-(4-methylbenzyl)-1H-benzo[d]imidazole-2-carbaldehyde (6d)**

Compound **3d** was used as reactant to give **6d**. While solid. Yield: 36%. <sup>1</sup>H NMR (400 MHz, CDCl<sub>3</sub>) δ 10.09 (s, 1H), 7.91 – 7.87 (m, 1H), 7.17 – 7.09 (m, 4H), 7.06 (d, *J* = 8.1 Hz, 2H), 5.77 (s, 2H), 2.30 (s, 3H).

**5-Methoxy-1-(4-methylbenzyl)-1H-benzo[d]imidazole-2-carbaldehyde (6e)**

Compound **3e** was used as reactant to give **6e**. While solid. Yield: 61%. <sup>1</sup>H NMR (400 MHz, CDCl<sub>3</sub>) δ 10.10 (s, 1H), 7.36 – 7.28 (m, 2H), 7.10 (d, *J* = 2.2 Hz, 1H), 7.09 – 7.04 (m, 4H),

5.79 (s, 2H), 3.88 (s, 3H), 2.29 (s, 3H).

**6-Methoxy-1-(4-methylbenzyl)-1H-benzod[*h*]imidazole-2-carbaldehyde (6f)**

Compound **3f** was used as reactant to give **6f**. While solid. Yield: 63%. <sup>1</sup>H NMR (400 MHz, CDCl<sub>3</sub>) δ 10.05 (s, 1H), 7.81 (d, *J* = 9.0 Hz, 1H), 7.10 (d, *J* = 8.2 Hz, 2H), 7.08 – 7.01 (m, 3H), 6.77 (d, *J* = 2.3 Hz, 1H), 5.78 (s, 2H), 3.84 (s, 3H), 2.30 (s, 3H).

**5-Chloro-1-(2-fluorobenzyl)-1H-benzod[*h*]imidazole-2-carbaldehyde (7a)**

Compound **4a** was used as reactant to give **7a**. While solid. Yield: 53%. <sup>1</sup>H NMR (400 MHz, CDCl<sub>3</sub>) δ 10.14 (s, 1H), 7.93 (d, *J* = 0.8 Hz, 1H), 7.44 – 7.37 (m, 2H), 7.36 – 7.28 (m, 1H), 7.12 – 7.06 (m, 1H), 7.06 – 7.00 (m, 1H), 6.98 – 6.90 (m, *J* = 7.6, 1.4 Hz, 1H), 5.92 (s, 2H).

**6-Chloro-1-(2-fluorobenzyl)-1H-benzod[*h*]imidazole-2-carbaldehyde(7b)**

Compound **4b** was used as reactant to give **7b**. While solid. Yield: 56%. <sup>1</sup>H NMR (400 MHz, CDCl<sub>3</sub>) δ 10.13 (s, 1H), 7.86 (d, *J* = 8.8 Hz, 1H), 7.47 (d, *J* = 1.6 Hz, 1H), 7.40 – 7.32 (m, 1H), 7.32 – 7.27 (m, 1H), 7.14 – 7.08 (m, 1H), 7.04 (t, *J* = 7.5 Hz, 1H), 6.94 (t, *J* = 7.5 Hz, 1H), 5.89 (s, 2H).

**5-Fluoro-1-(2-fluorobenzyl)-1H-benzod[*h*]imidazole-2-carbaldehyde (7c)**

Compound **4c** was used as reactant to give **7c**. While solid. Yield: 62%. <sup>1</sup>H NMR (400 MHz, CDCl<sub>3</sub>) δ 10.14 (s, 1H), 7.63 – 7.55 (m, 1H), 7.47 – 7.39 (m, 1H), 7.31 – 7.26 (m, 1H), 7.23 – 7.19 (m, 1H), 7.12 – 7.07 (m, 1H), 7.13 – 7.05 (m, 1H), 6.97 – 6.93 (m, 1H), 5.92 (s, 2H).

**6-Fluoro-1-(2-fluorobenzyl)-1H-benzod[*h*]imidazole-2-carbaldehyde (7d)**

Compound **4d** was used as reactant to give **7d**. While solid. Yield: 57%. <sup>1</sup>H NMR (400 MHz, CDCl<sub>3</sub>) δ 10.11 (s, 1H), 7.92 – 7.88 (m, 1H), 7.32 – 7.26 (m, 1H), 7.17 – 7.09 (m, 3H), 7.06 – 7.02 (m, 1H), 7.02 – 6.94 (m, 1H), 5.89 (s, 2H).

**1-(2-Fluorobenzyl)-5-methoxy-1H-benzod[*h*]imidazole-2-carbaldehyde (7e)**



Compound **4e** was used as reactant to give **7e**. While solid. Yield: 42%. <sup>1</sup>H NMR (400 MHz, CDCl<sub>3</sub>) δ 10.11 (s, 1H), 7.35 (d, *J* = 9.1 Hz, 1H), 7.31 (d, *J* = 2.2 Hz, 1H), 7.26 – 7.22 (m, 1H), 7.13 – 7.05 (m, 2H), 7.01 (t, *J* = 7.5 Hz, 1H), 6.92 (t, *J* = 7.6 Hz, 1H), 5.91 (s, 2H), 3.88 (s, 3H).

***1-(2-Fluorobenzyl)-6-methoxy-1H-benzof[*d*]imidazole-2-carbaldehyde (7f)***

Compound **4f** was used as reactant to give **7f**. While solid. Yield: 45%. <sup>1</sup>H NMR (400 MHz, CDCl<sub>3</sub>) δ 10.07 (s, 1H), 7.81 (d, *J* = 9.0 Hz, 1H), 7.30 – 7.26 (m, 1H), 7.13 – 7.07 (m, 1H), 7.06 – 7.00 (m, 2H), 6.98 – 6.94 (m, 1H), 6.82 (d, *J* = 2.3 Hz, 1H), 5.90 (s, 2H), 3.85 (s, 3H).

# $^1\text{H}$ NMR and $^{13}\text{C}$ NMR Spectrum of Target Compounds

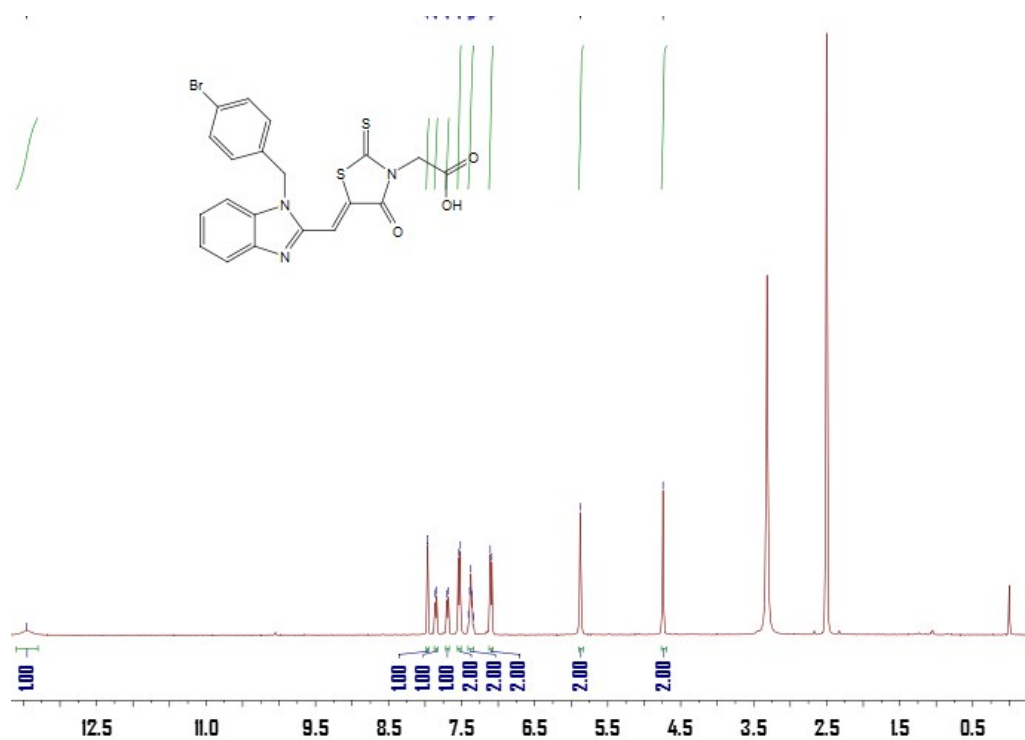

$^1\text{H}$  NMR (400 MHz,  $\text{DMSO-}d_6$ ) spectrum of **8a**

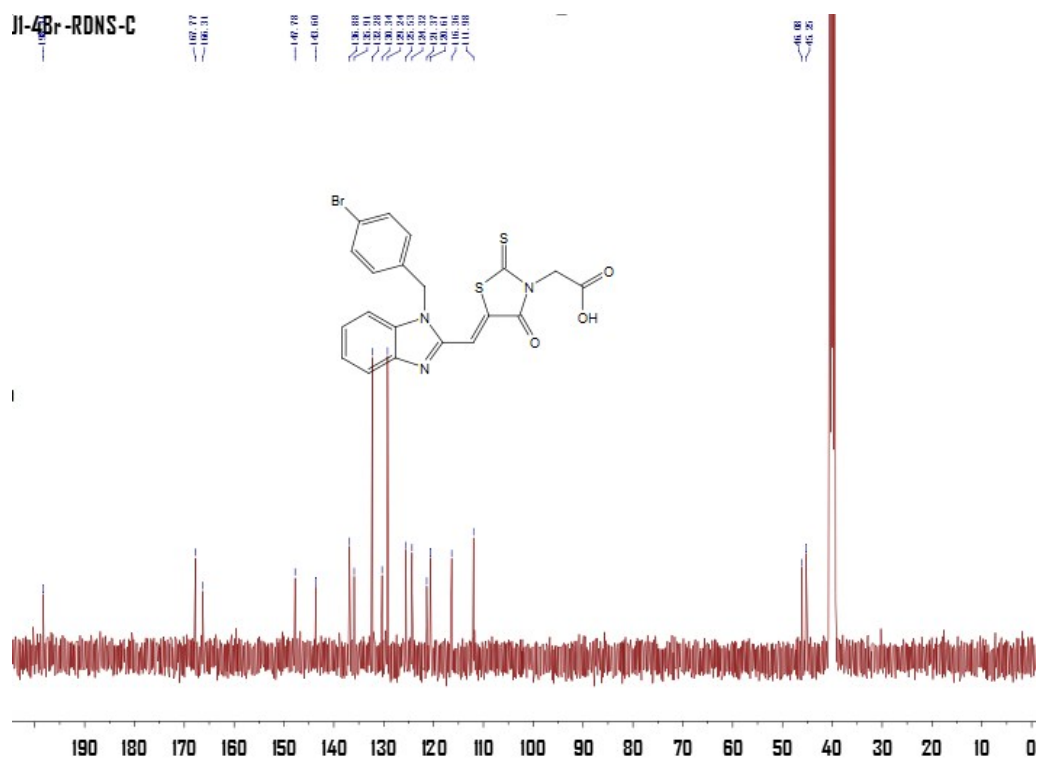

$^{13}\text{C}$  NMR (400 MHz,  $\text{DMSO-}d_6$ ) spectrum of **8a**

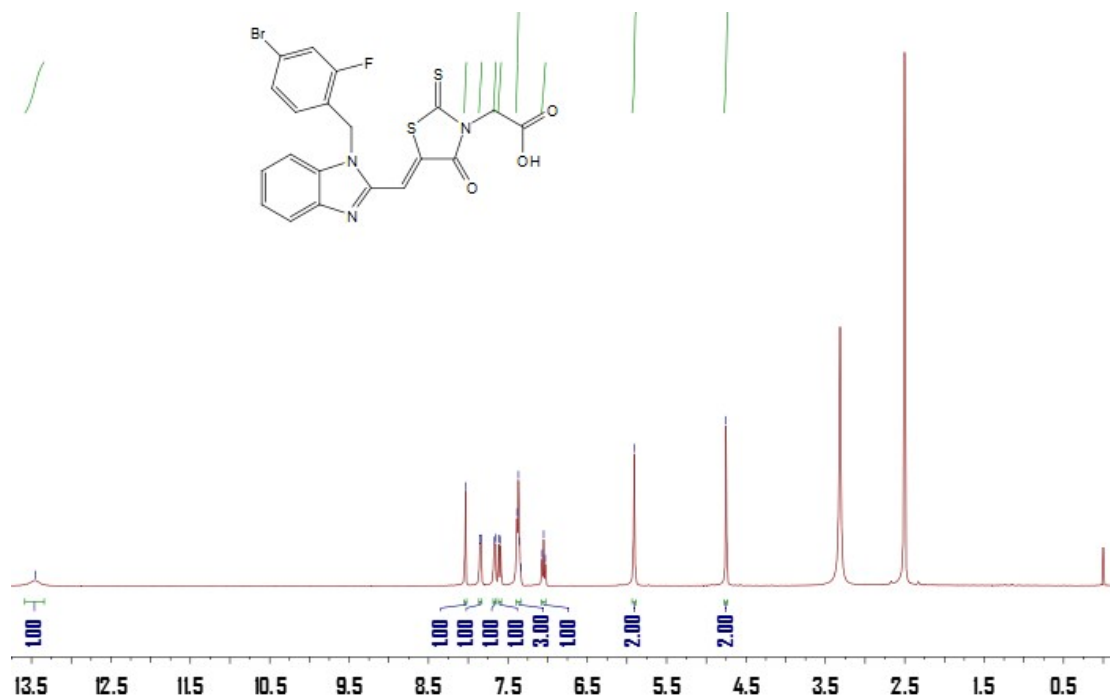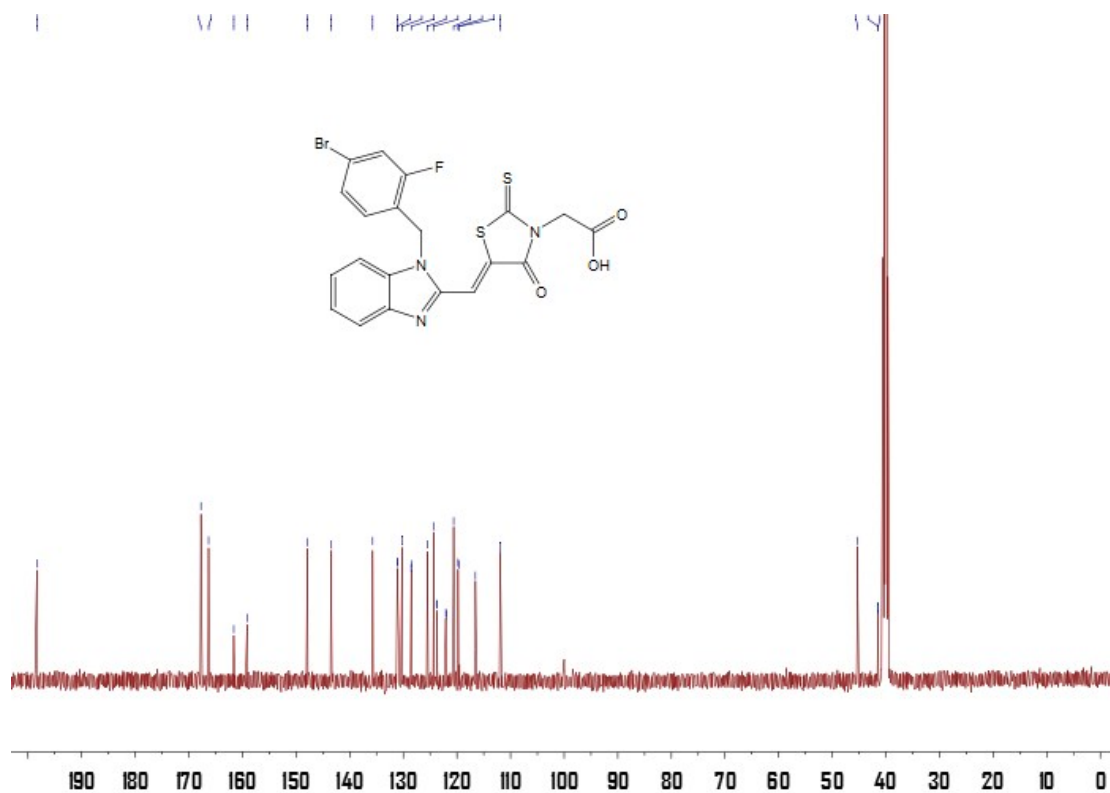

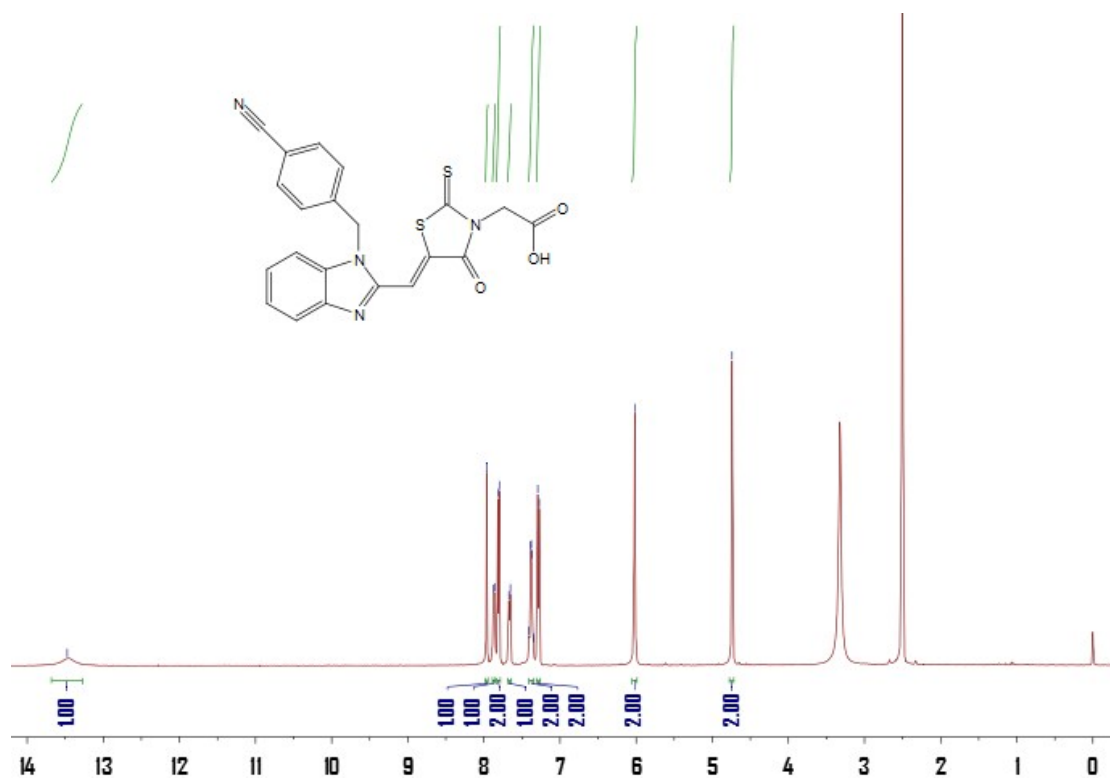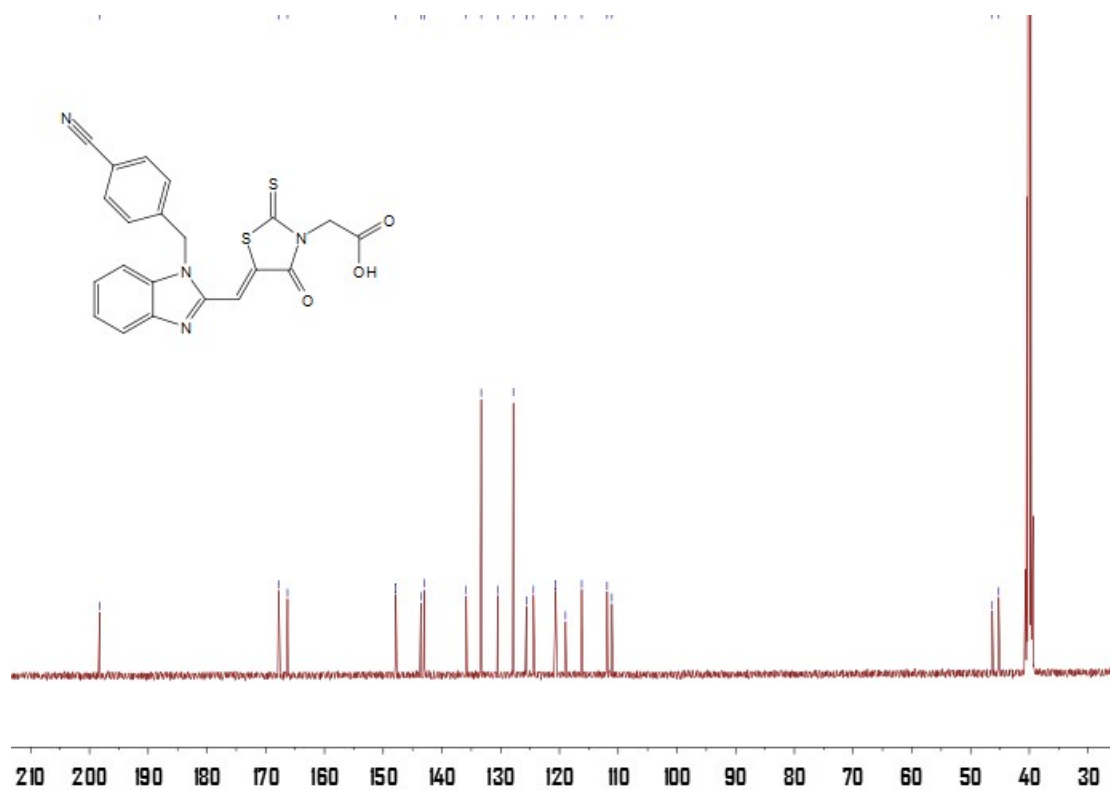

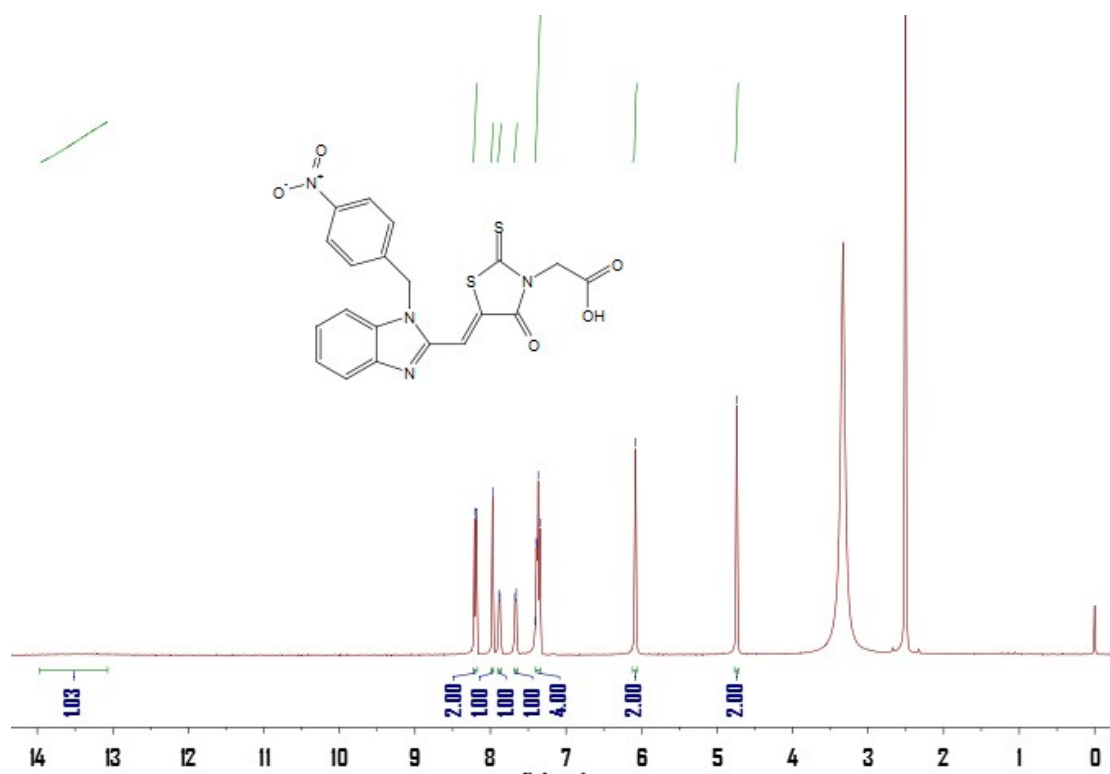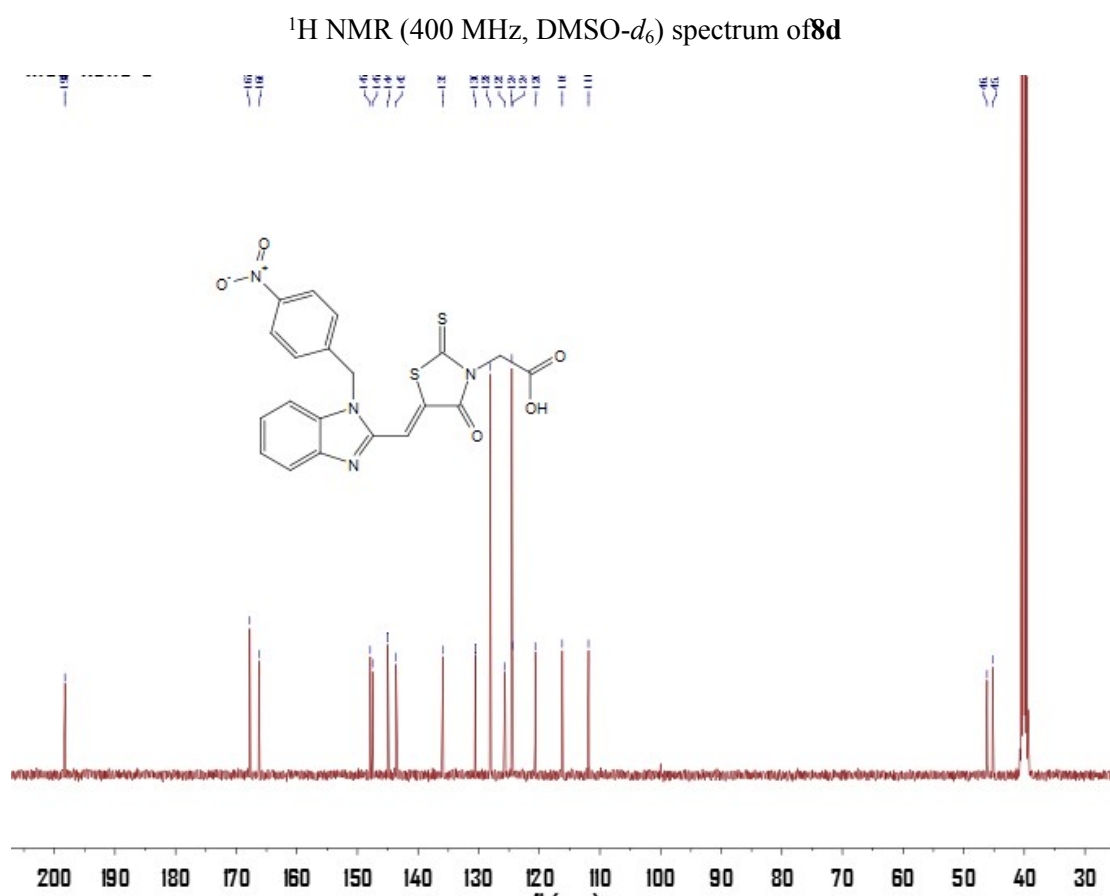

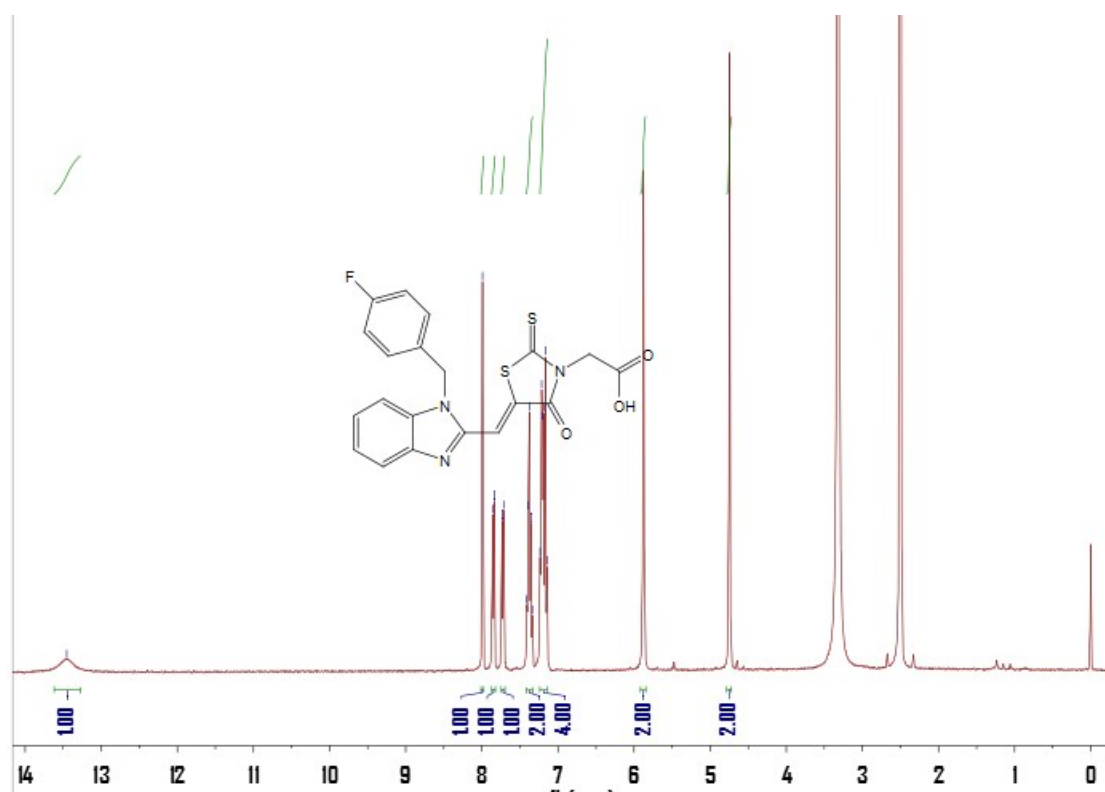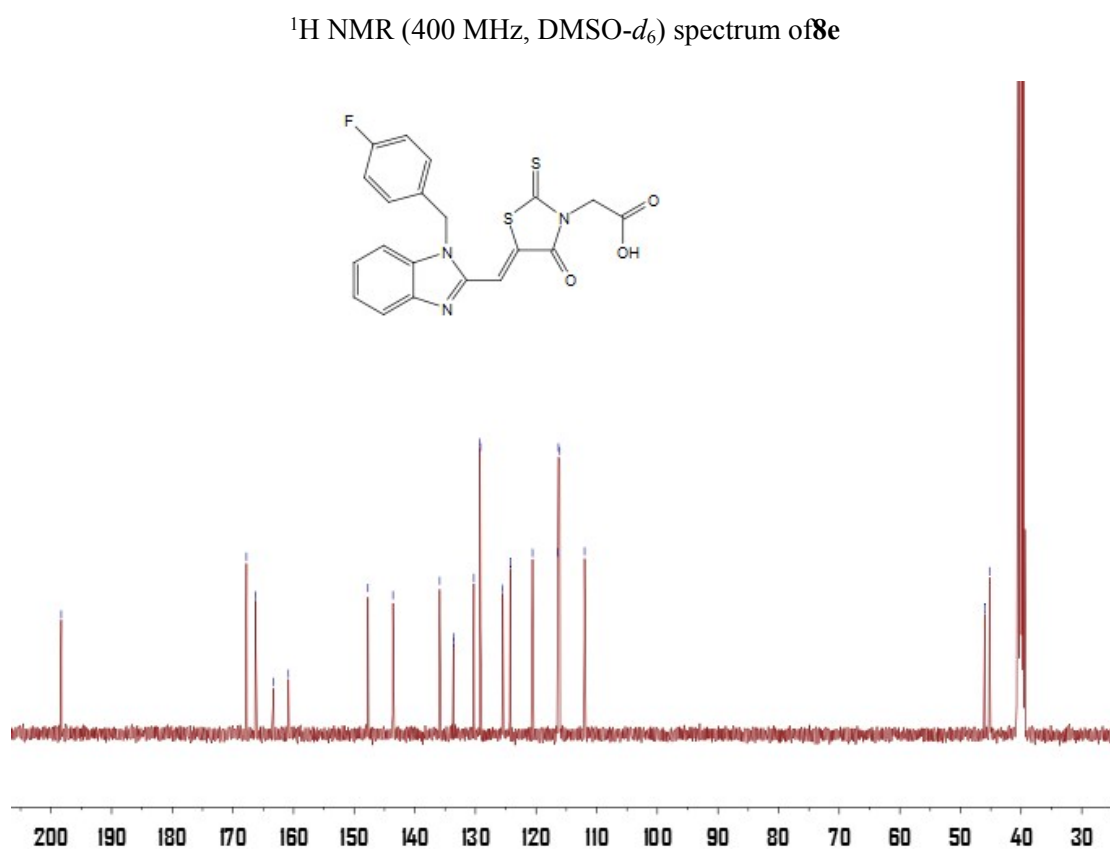

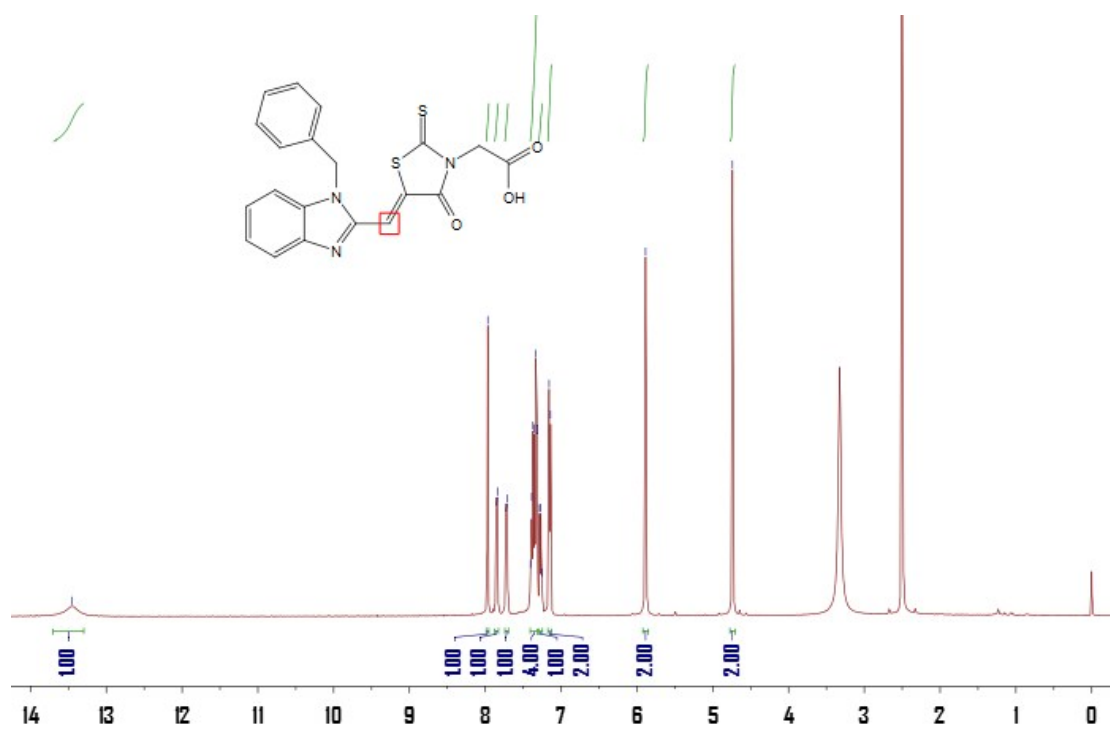

$^1\text{H NMR}$  (400 MHz,  $\text{DMSO-}d_6$ ) spectrum of **8f**

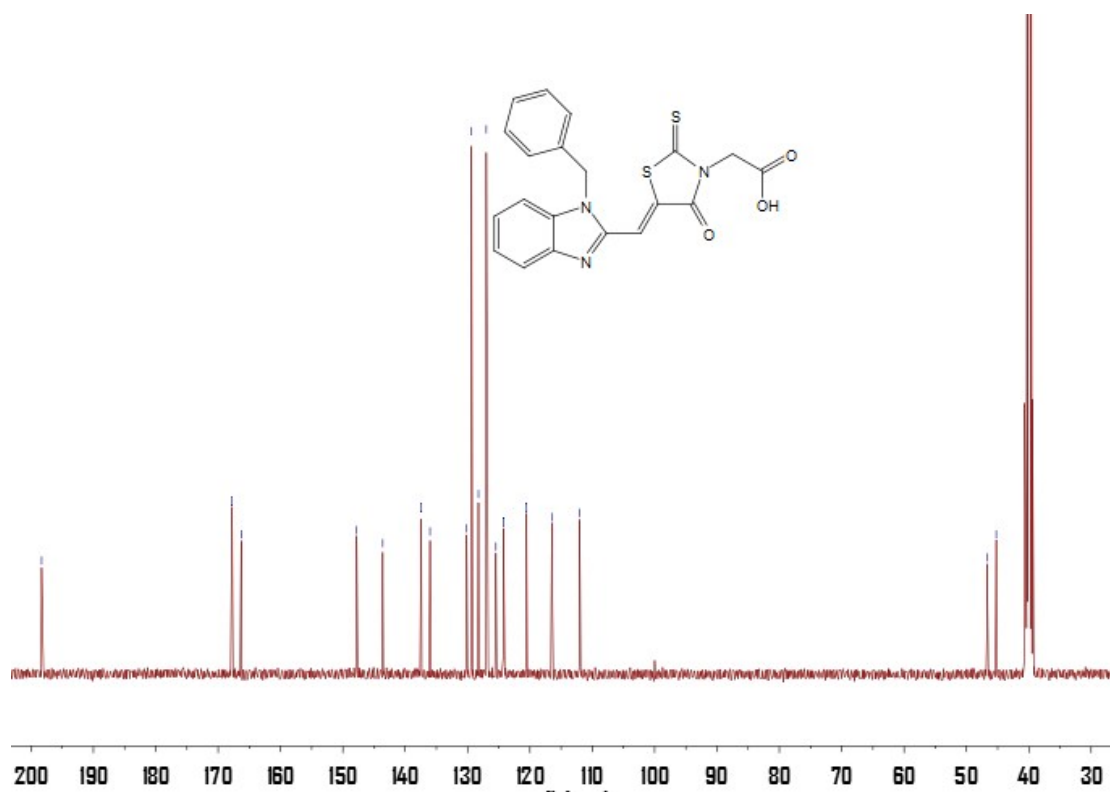

$^{13}\text{C NMR}$  (400 MHz,  $\text{DMSO-}d_6$ ) spectrum of **8f**

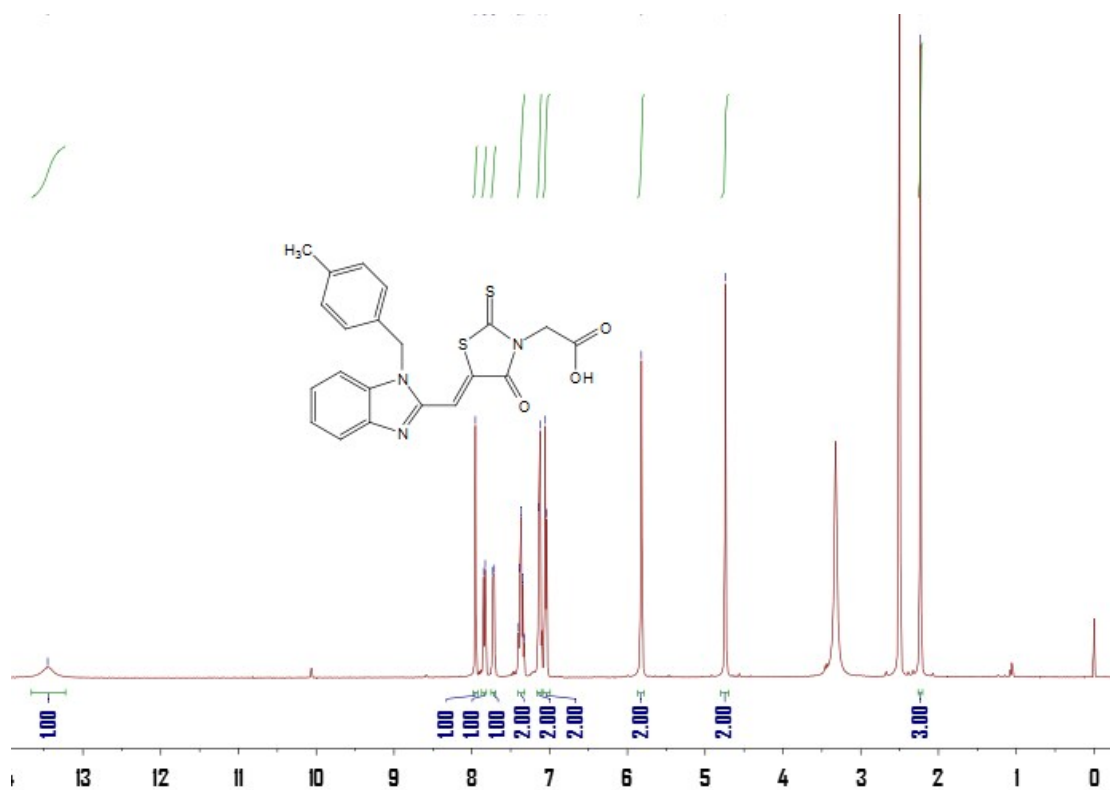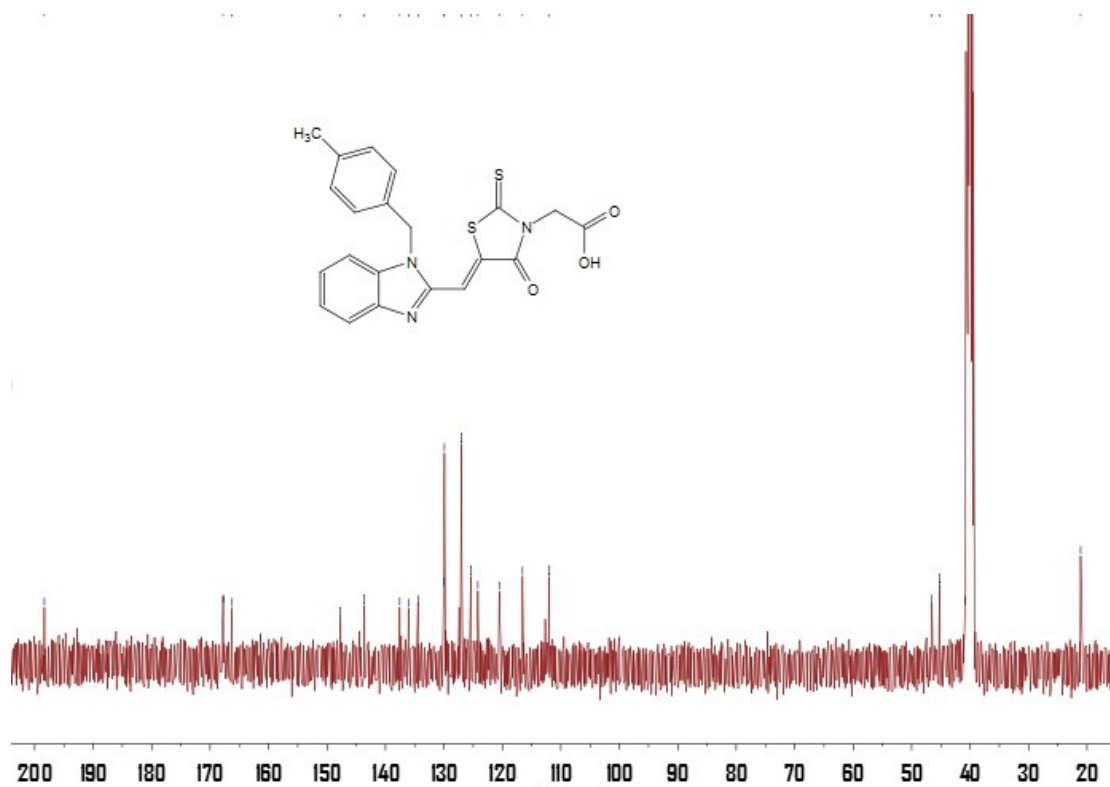



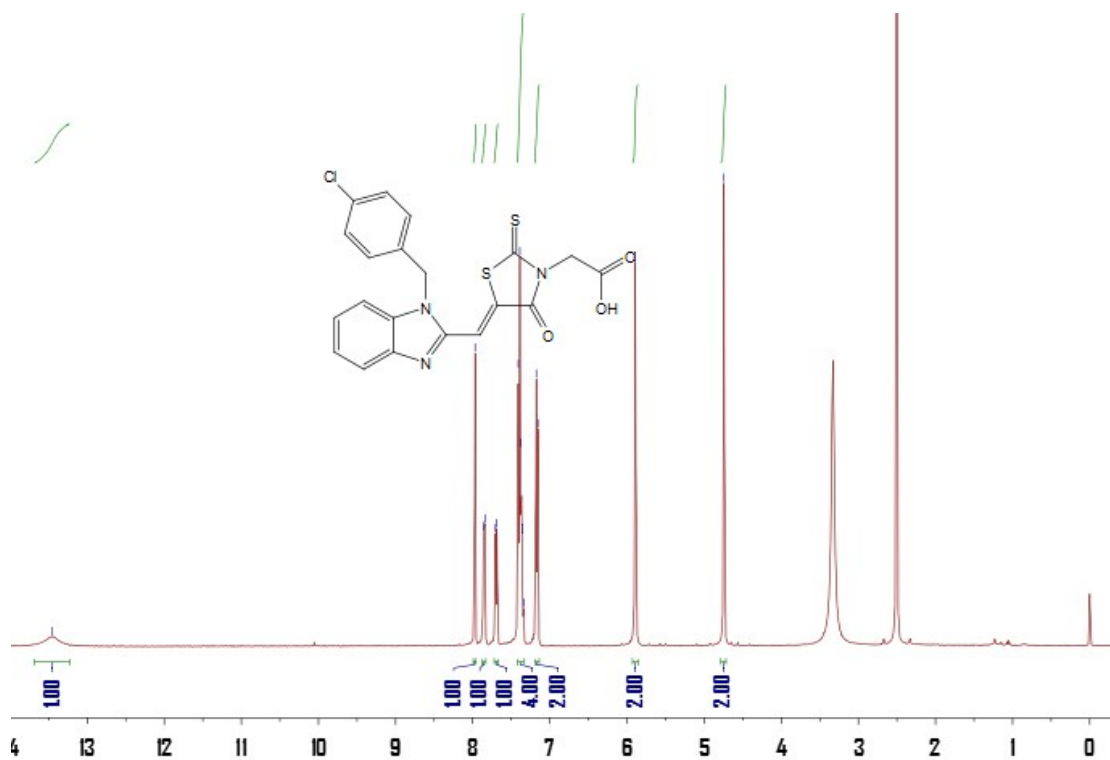

<sup>1</sup>H NMR (400 MHz, DMSO-*d*<sub>6</sub>) spectrum of **8h**

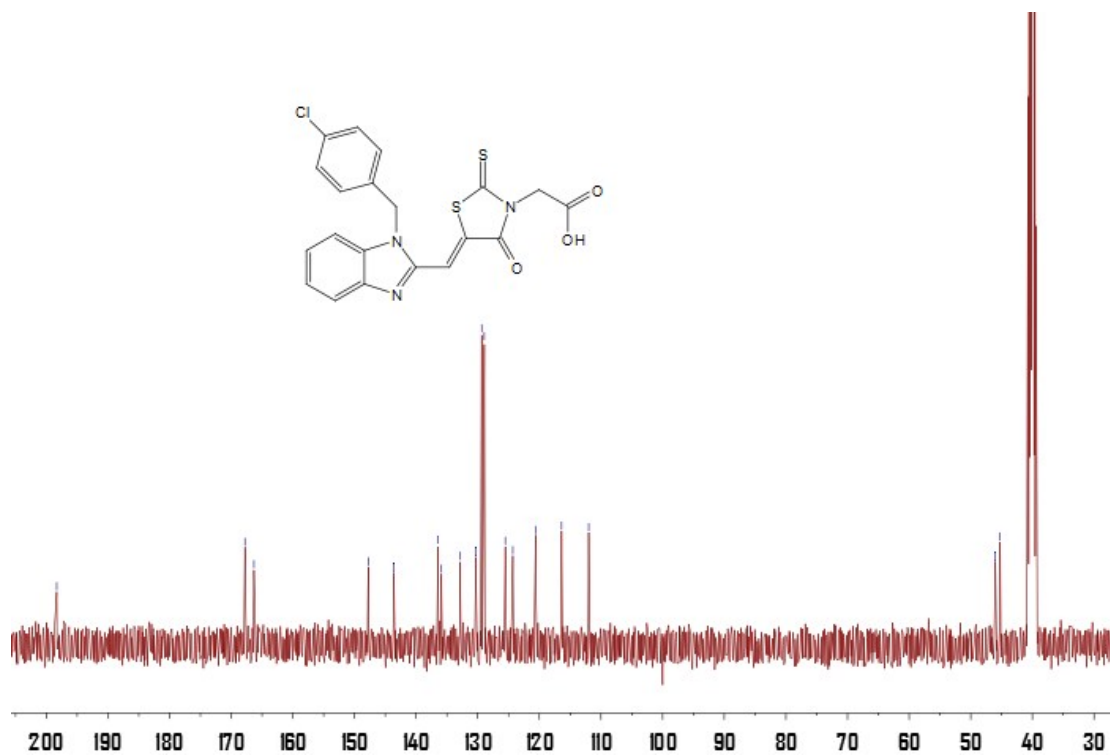

<sup>13</sup>C NMR (400 MHz, DMSO-*d*<sub>6</sub>) spectrum of **8h**

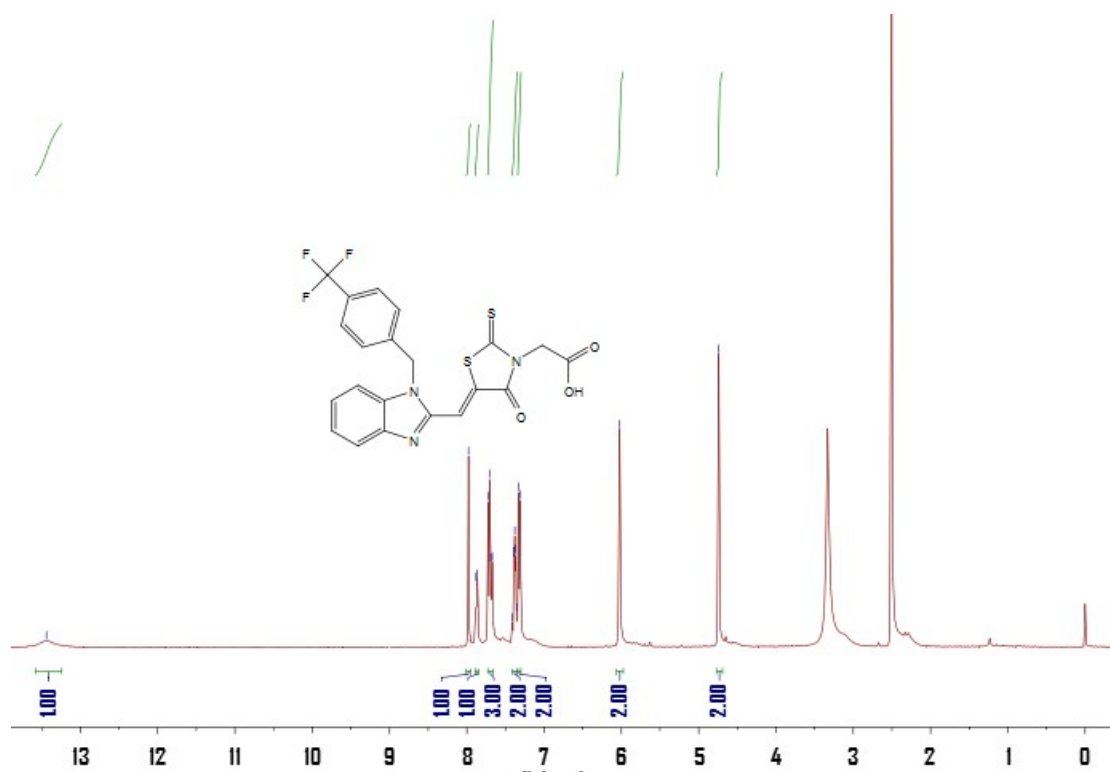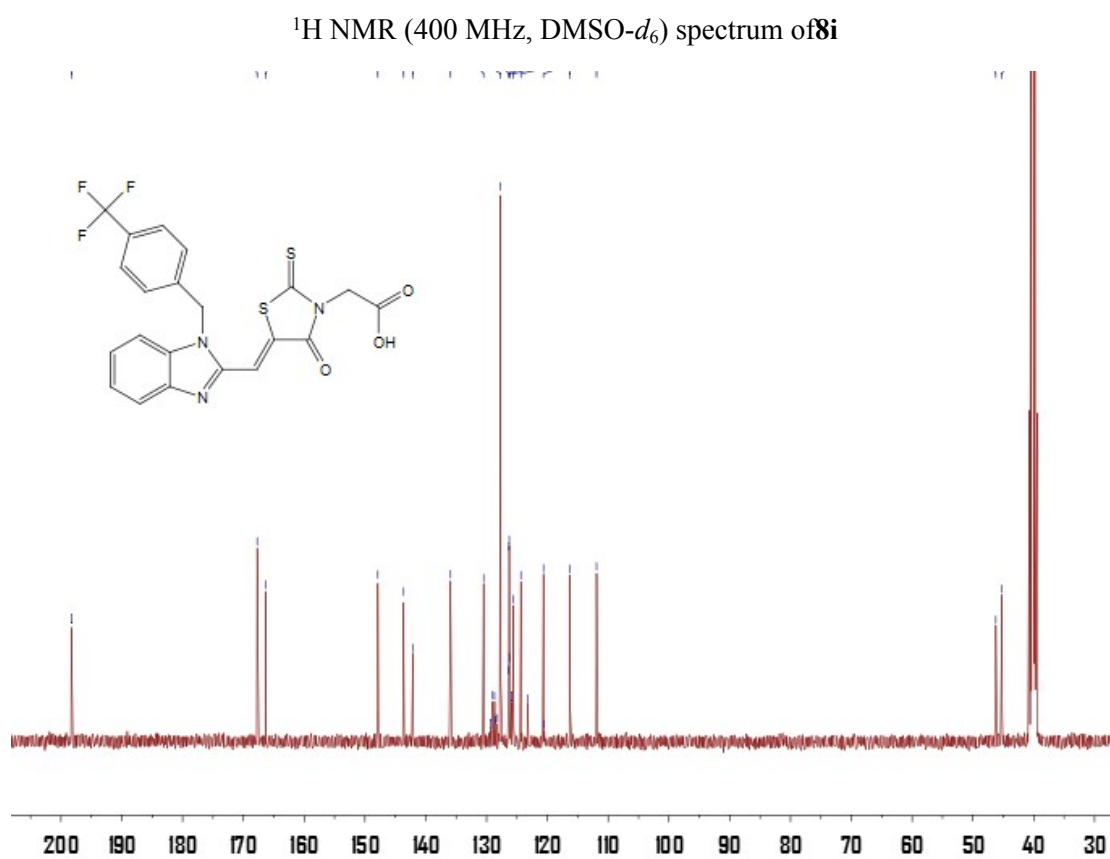

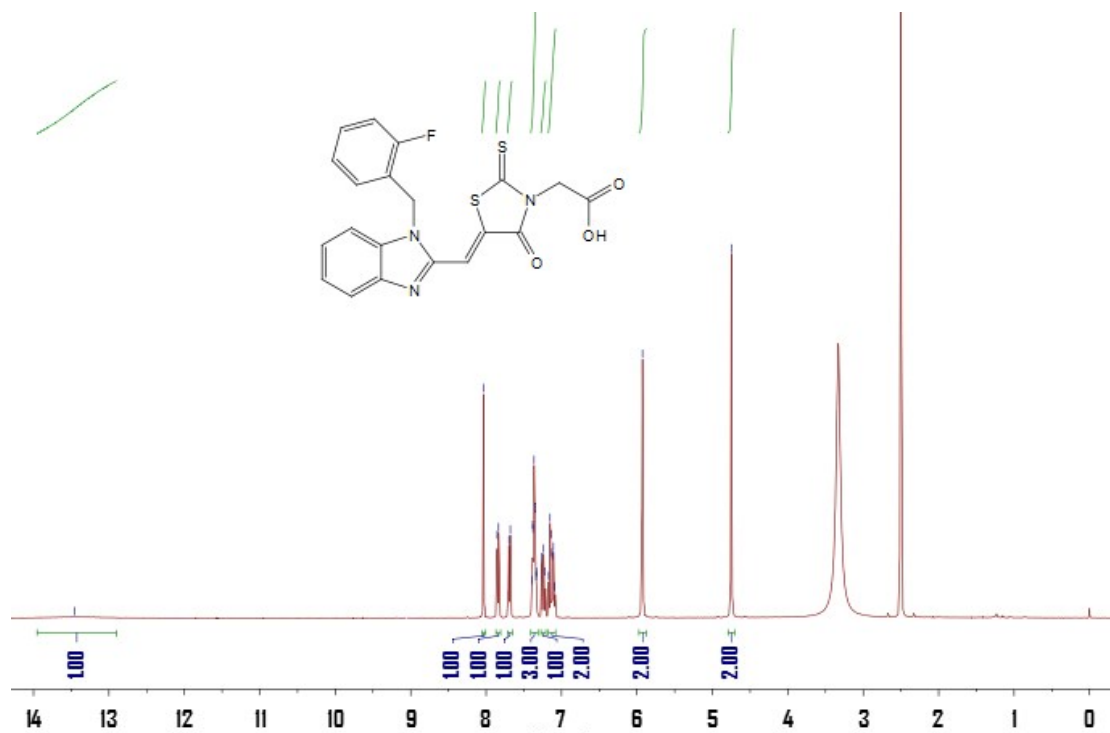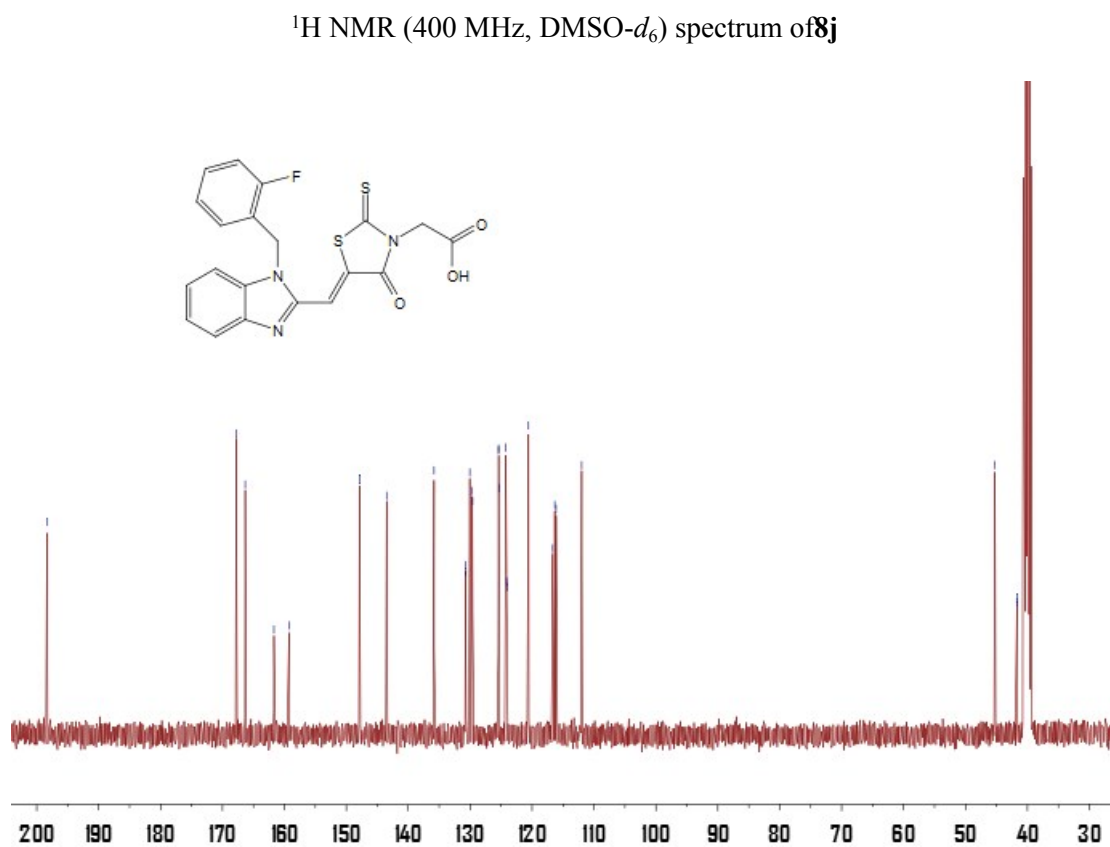

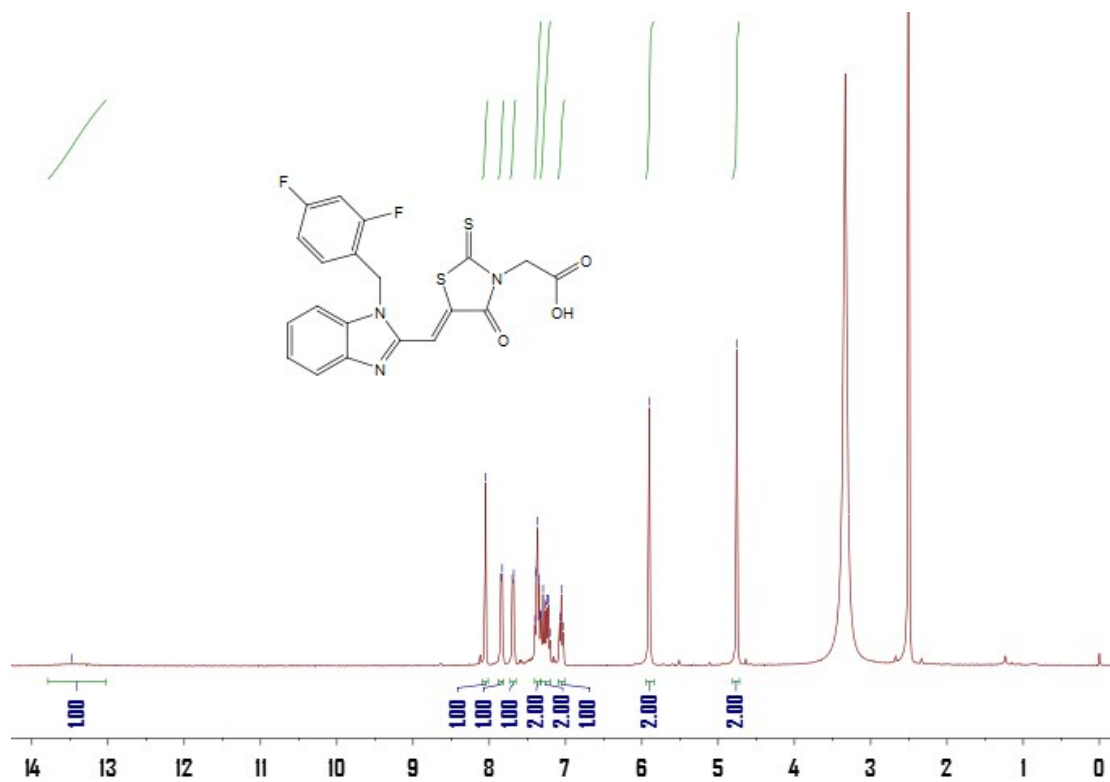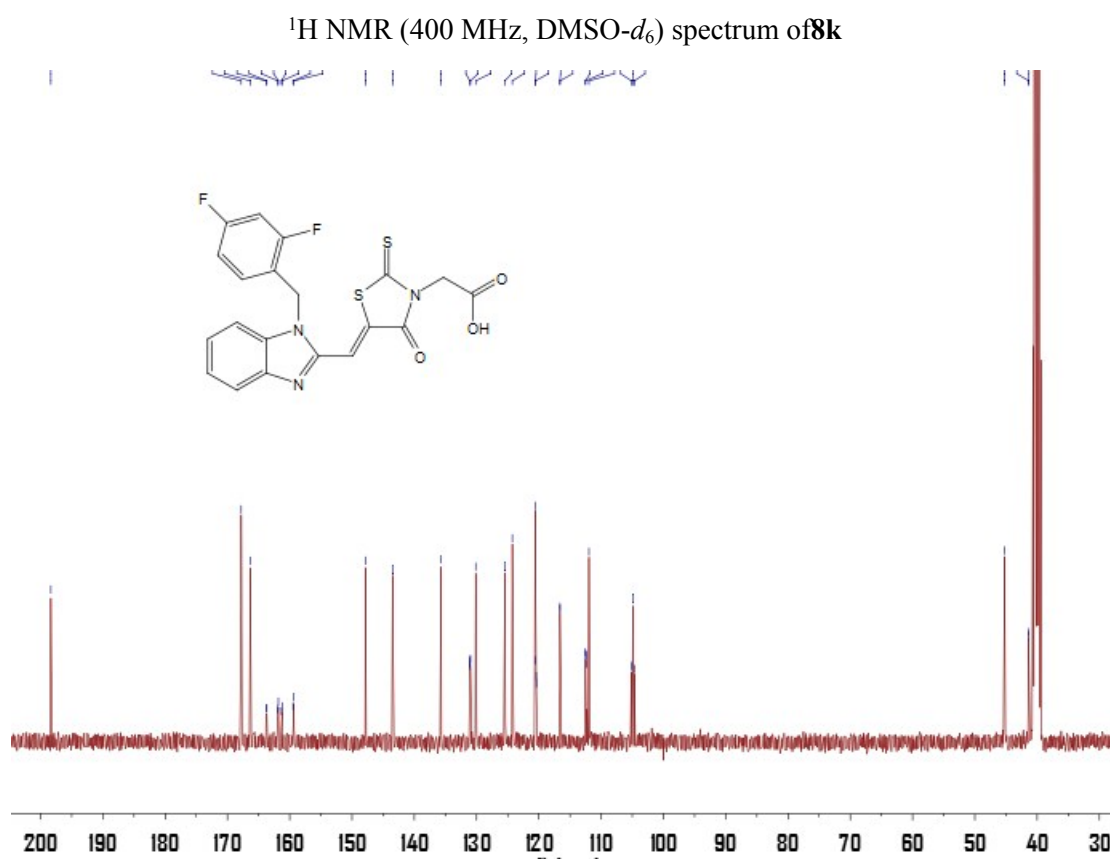

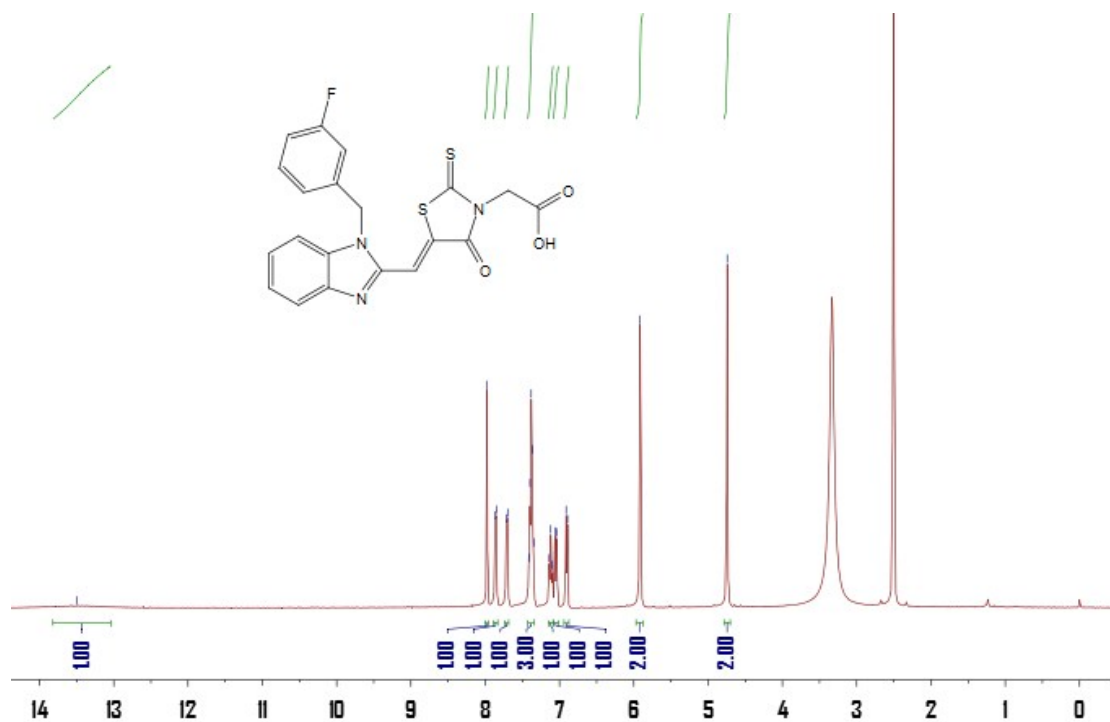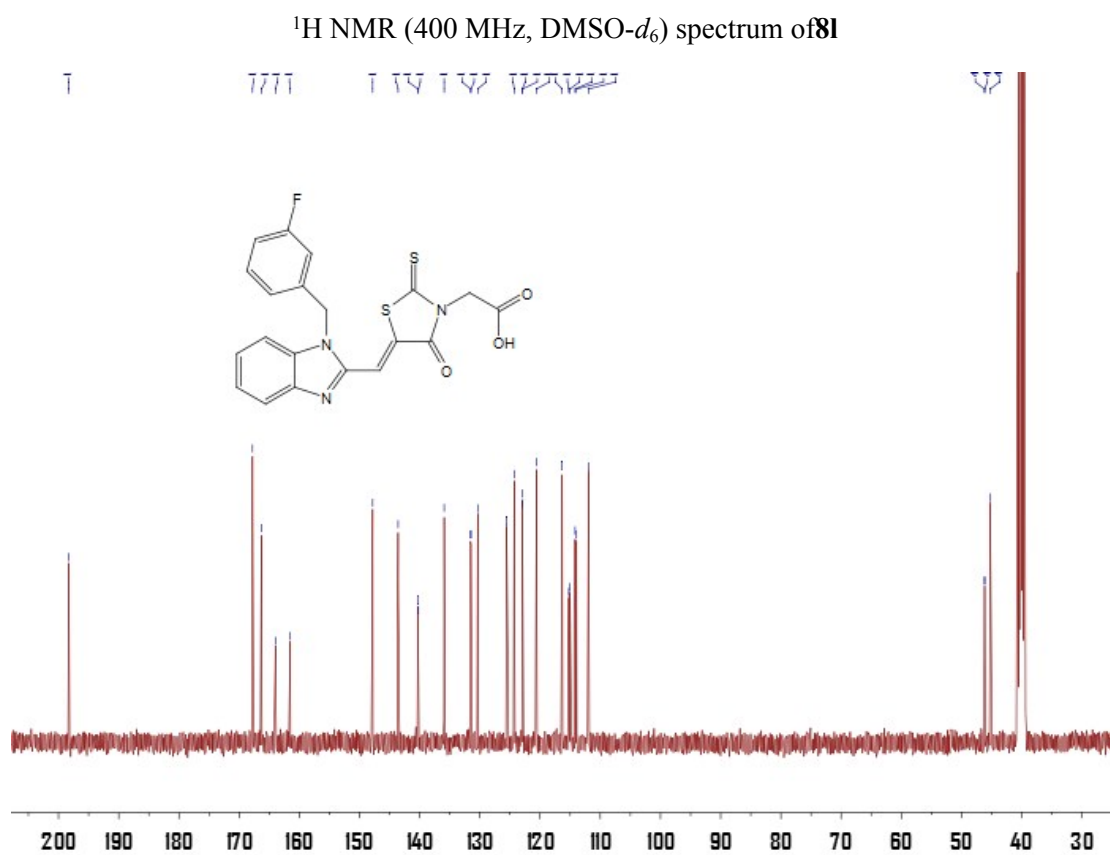

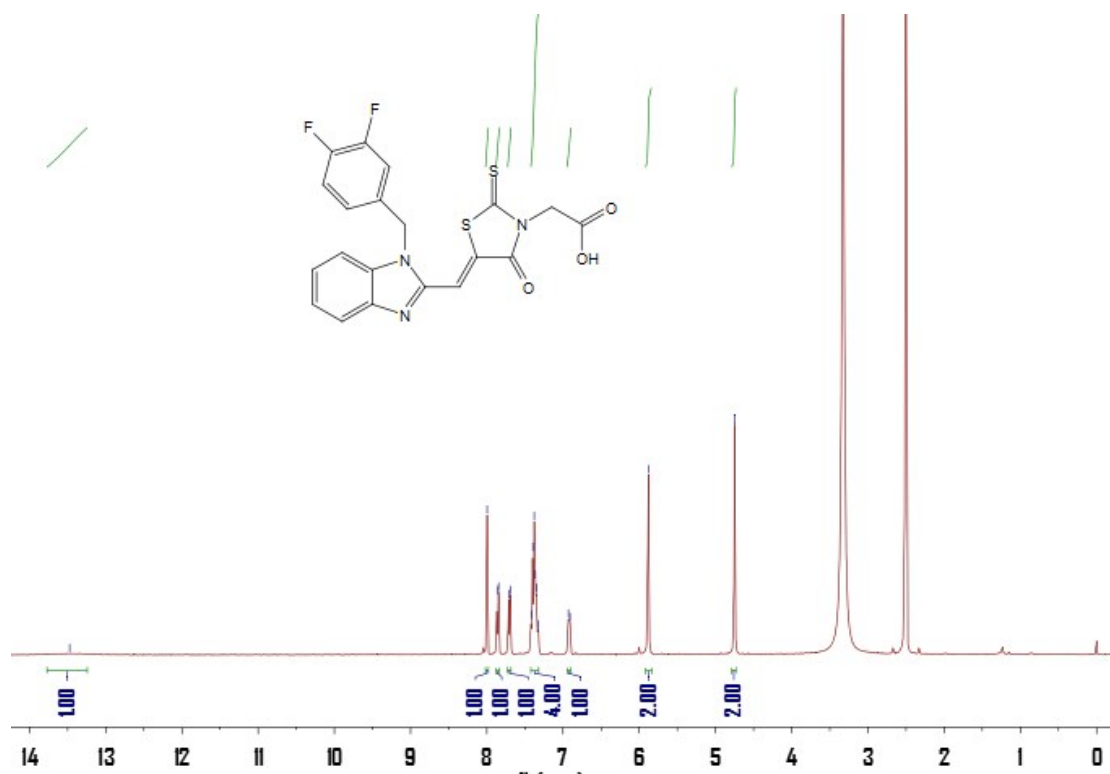

<sup>1</sup>H NMR (400 MHz, DMSO-*d*<sub>6</sub>) spectrum of **8m**

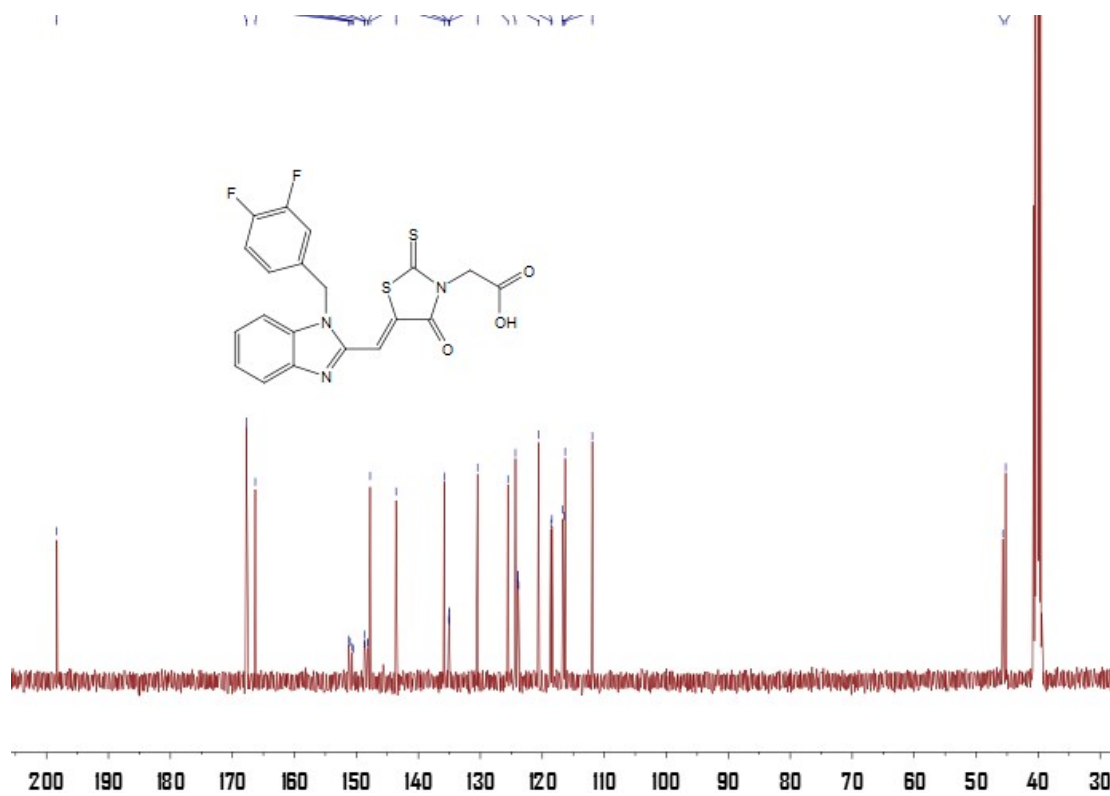

<sup>13</sup>C NMR (400 MHz, DMSO-*d*<sub>6</sub>) spectrum of **8m**

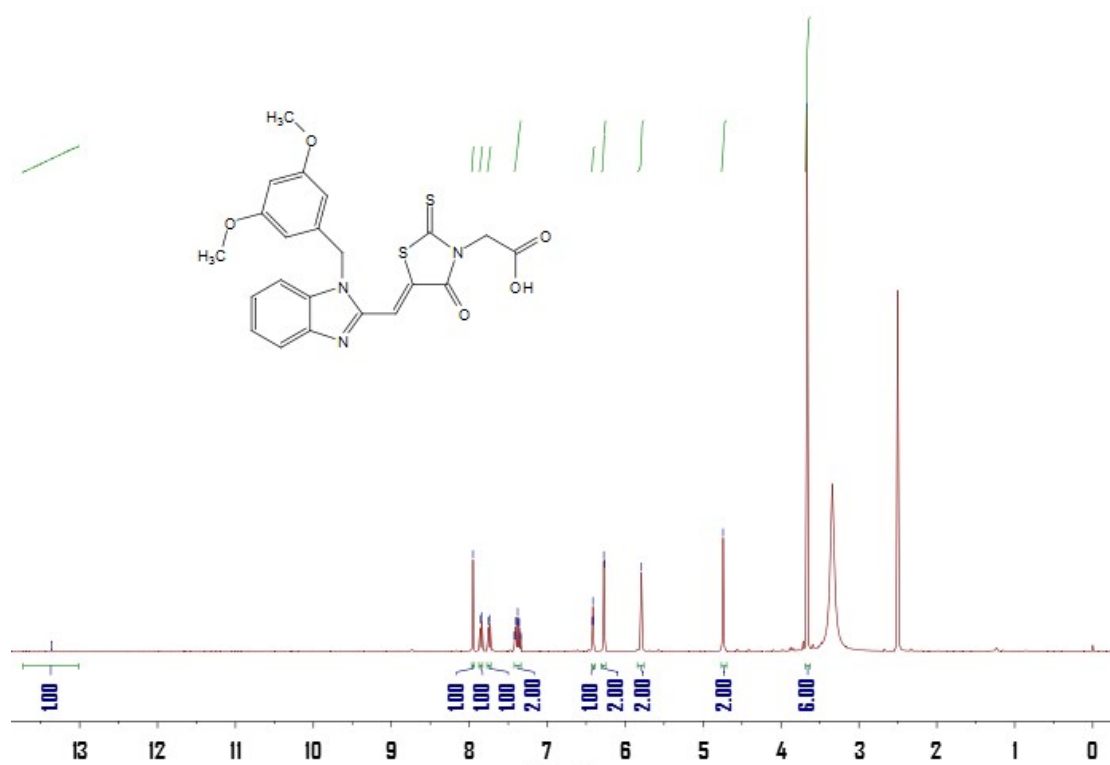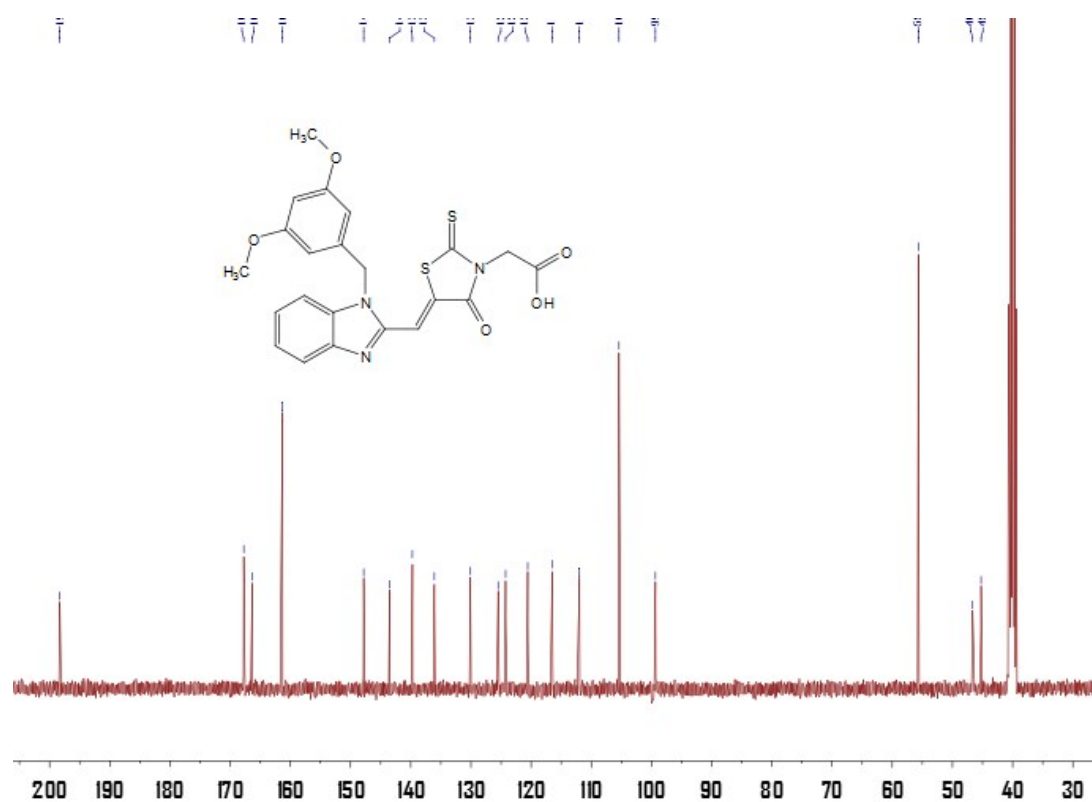

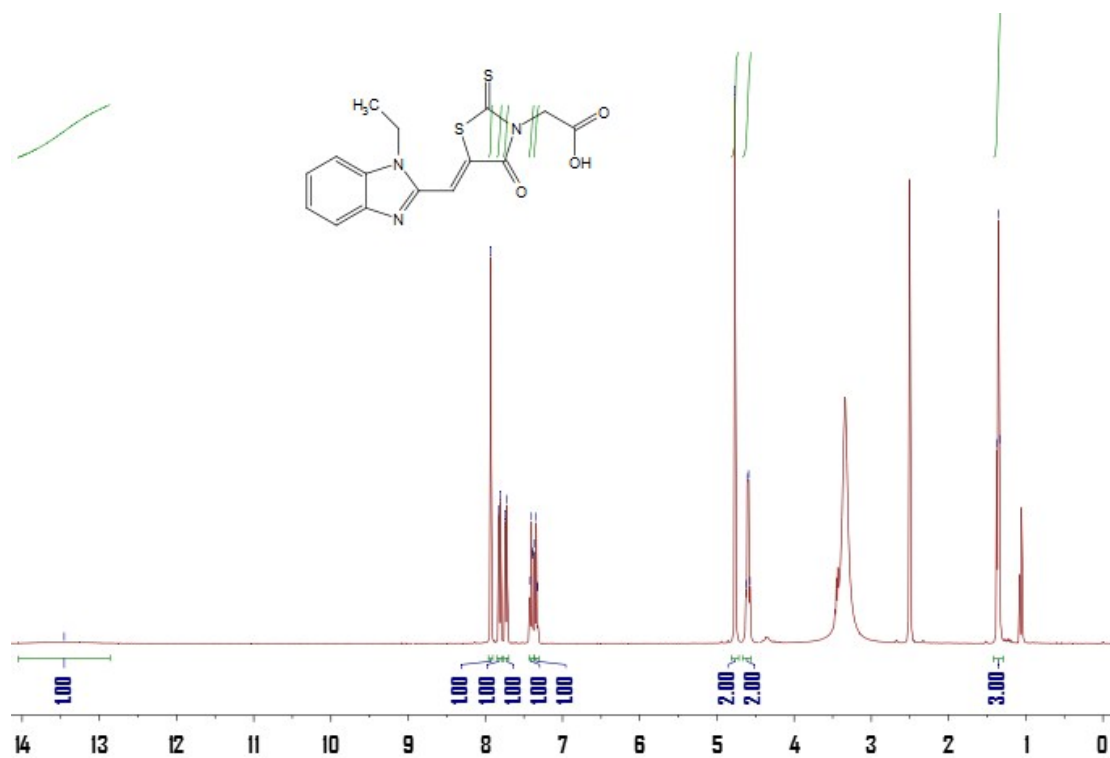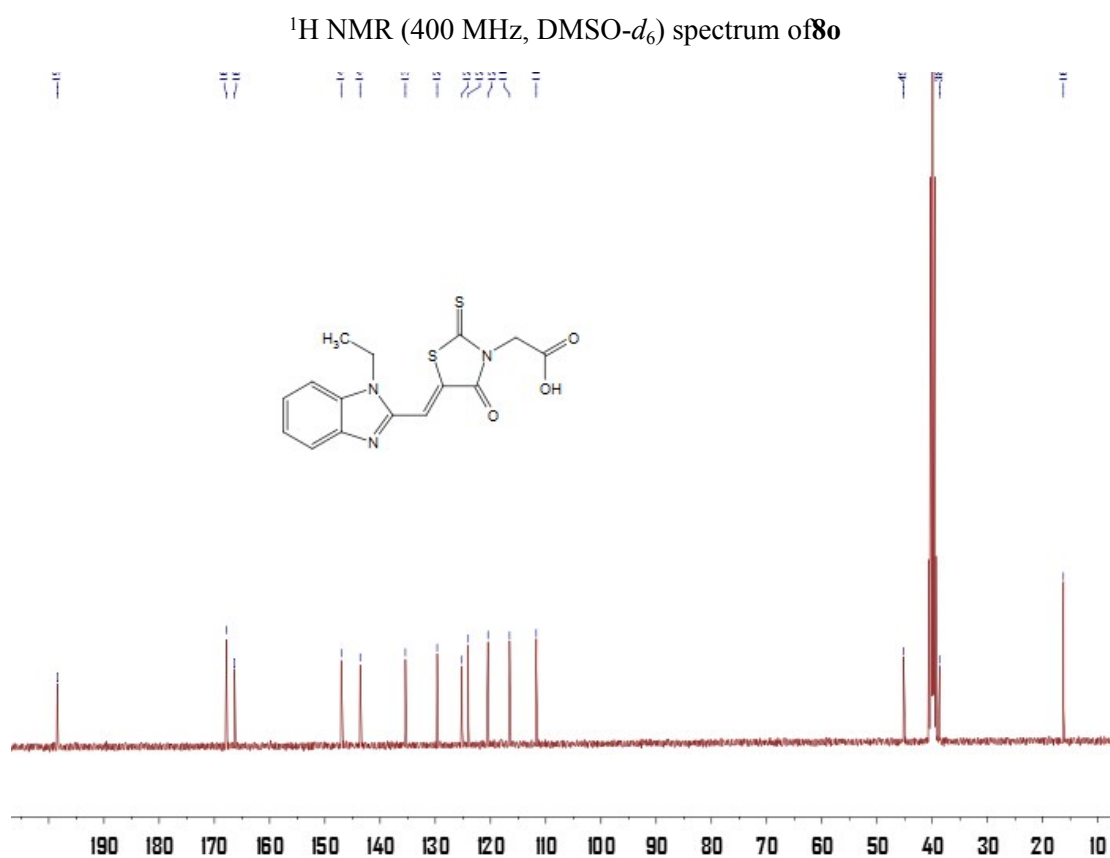



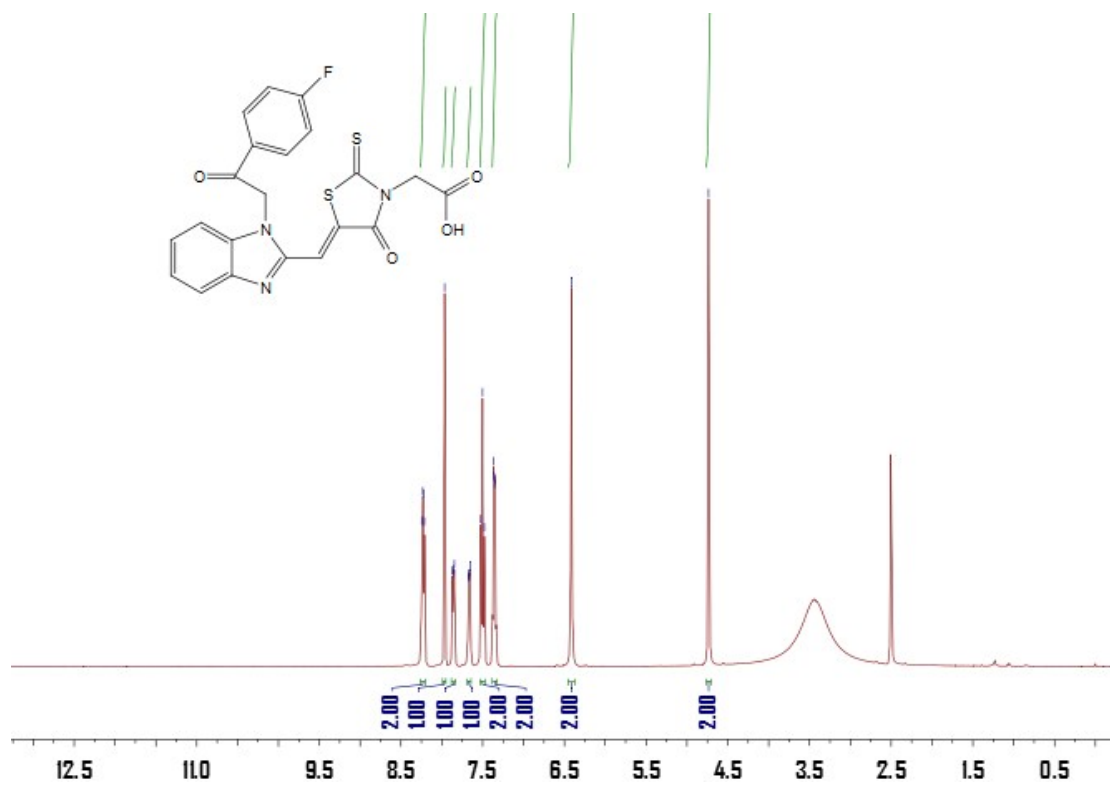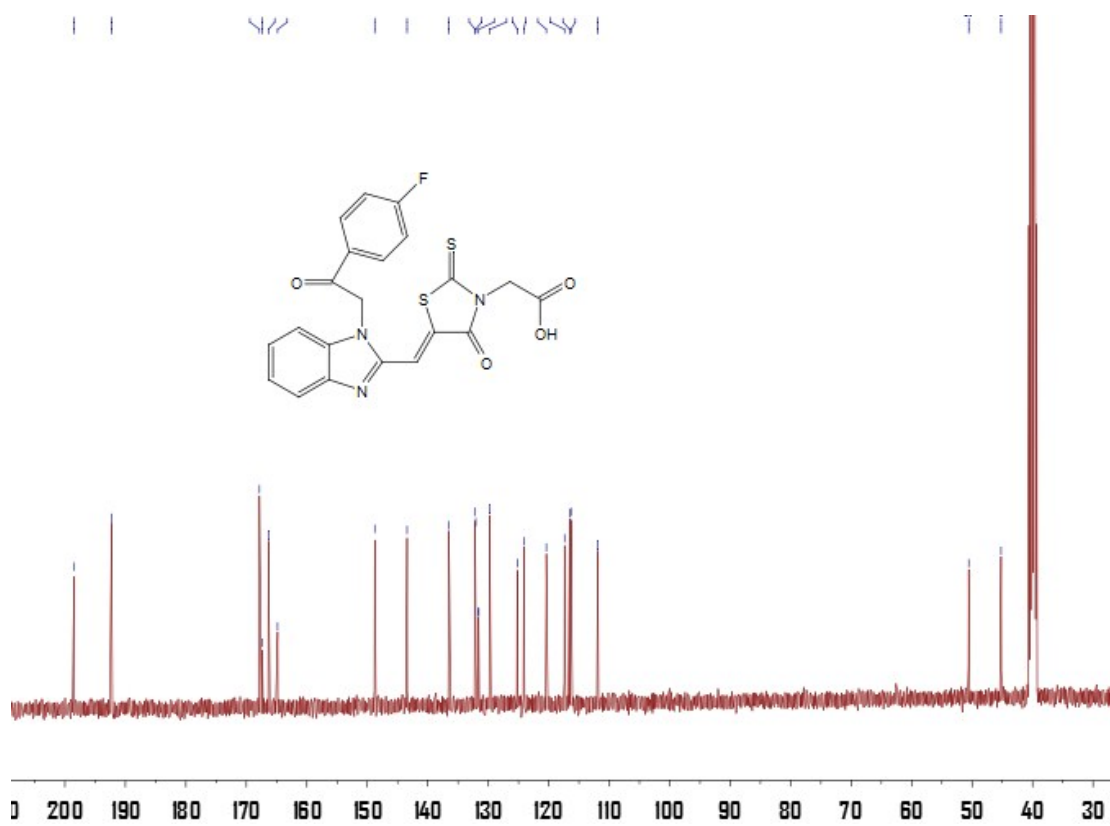

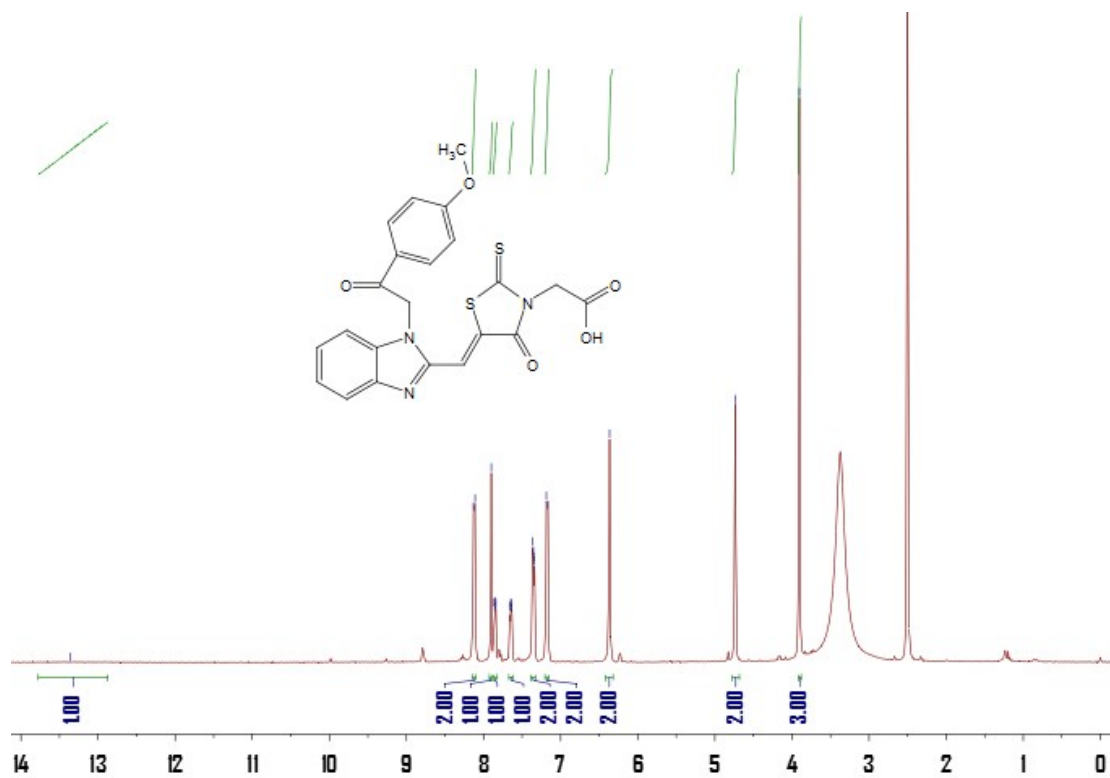

<sup>1</sup>H NMR (400 MHz, DMSO-*d*<sub>6</sub>) spectrum of **9b**

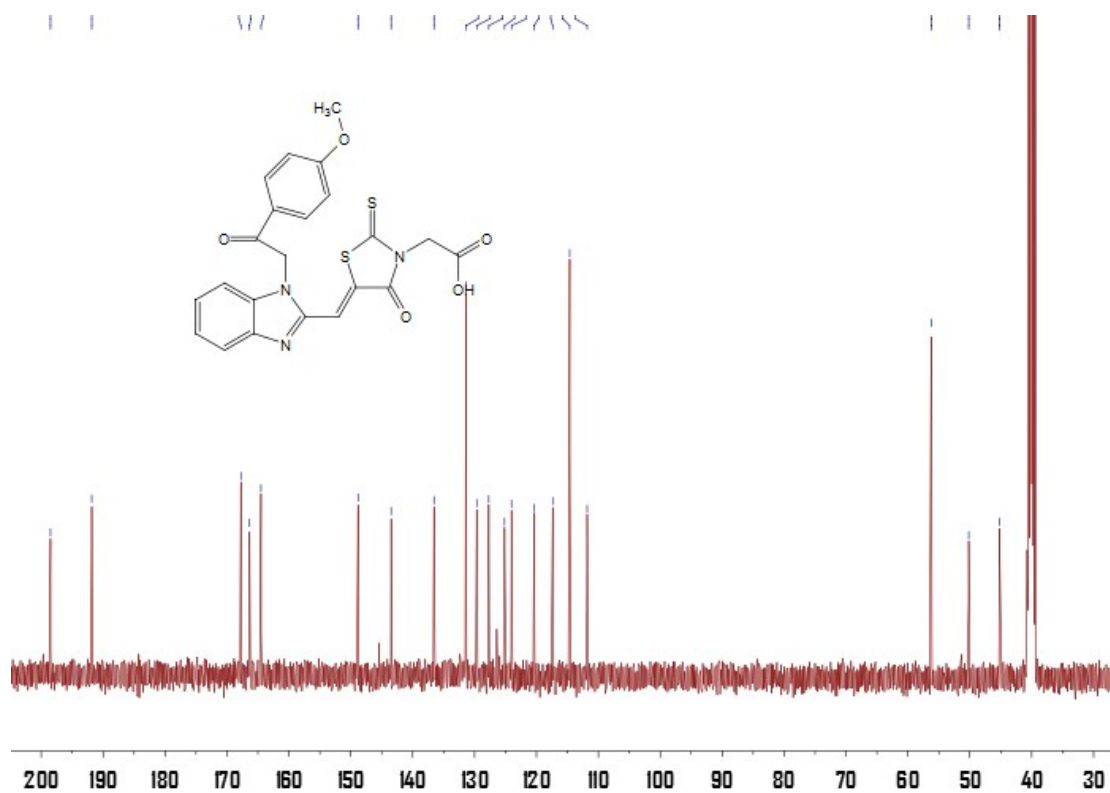

<sup>13</sup>C NMR (400 MHz, DMSO-*d*<sub>6</sub>) spectrum of **9b**

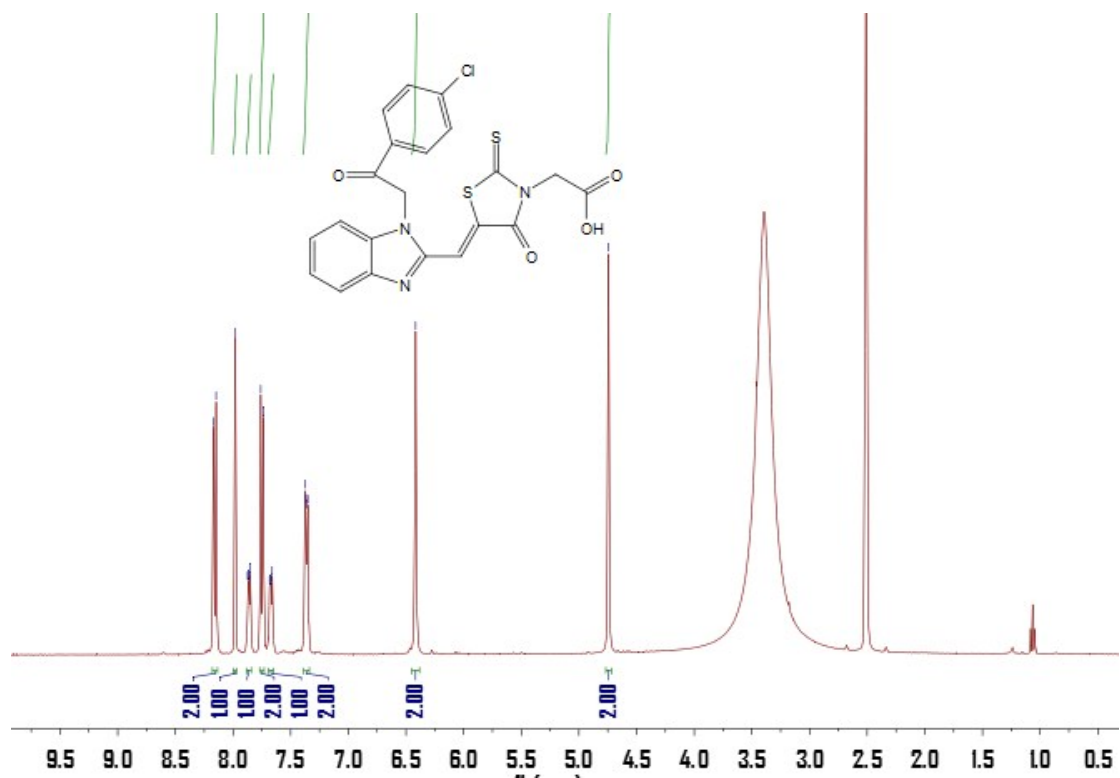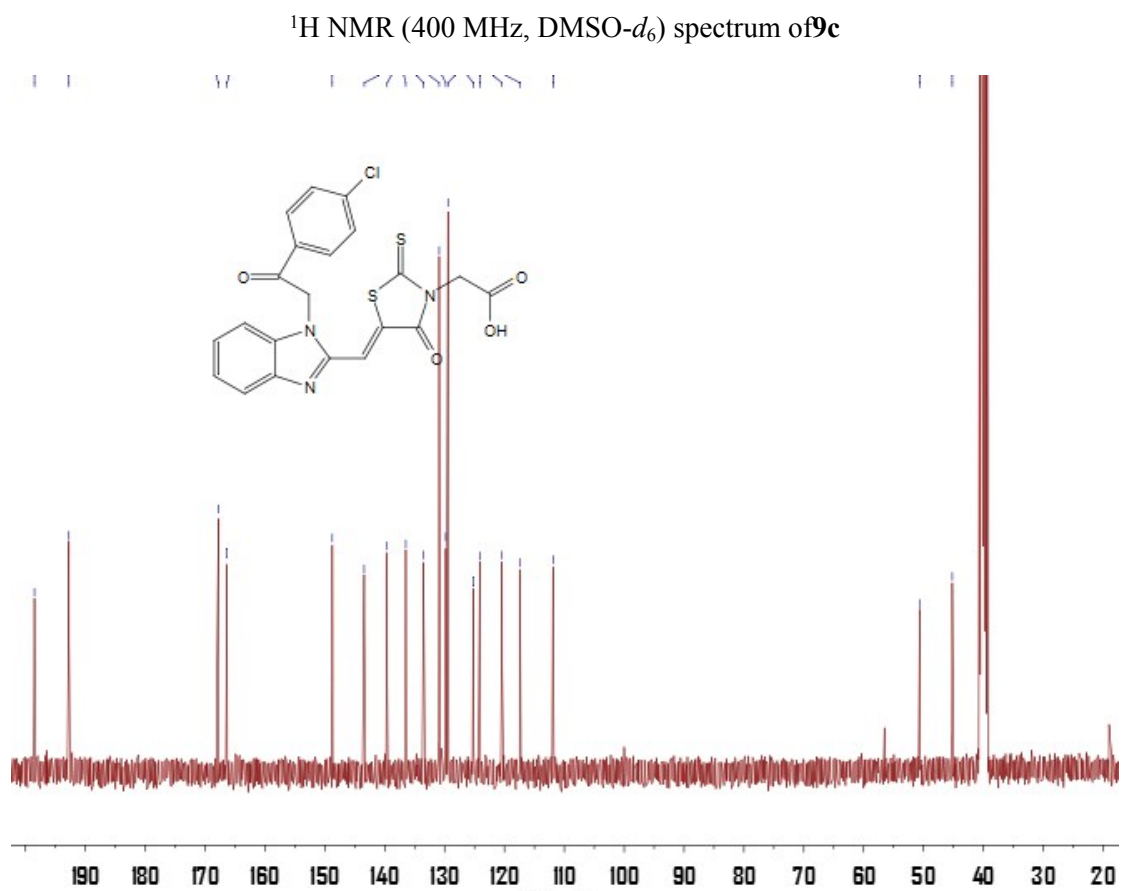

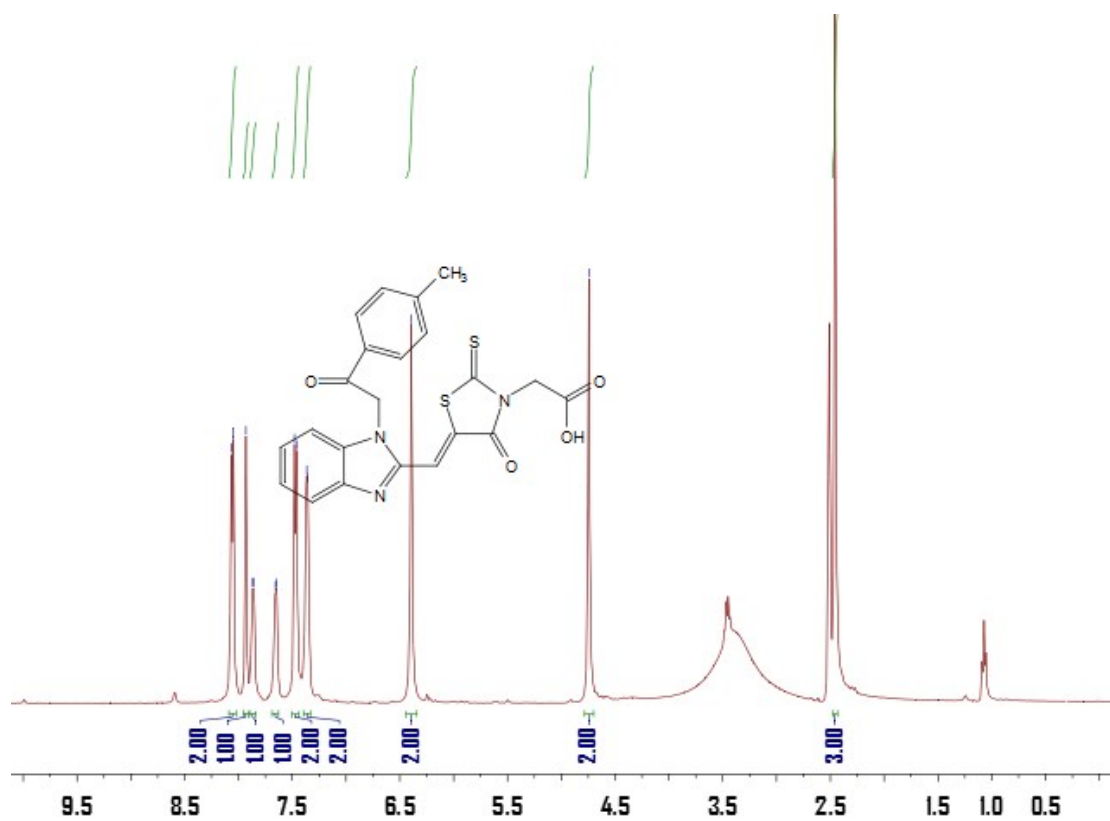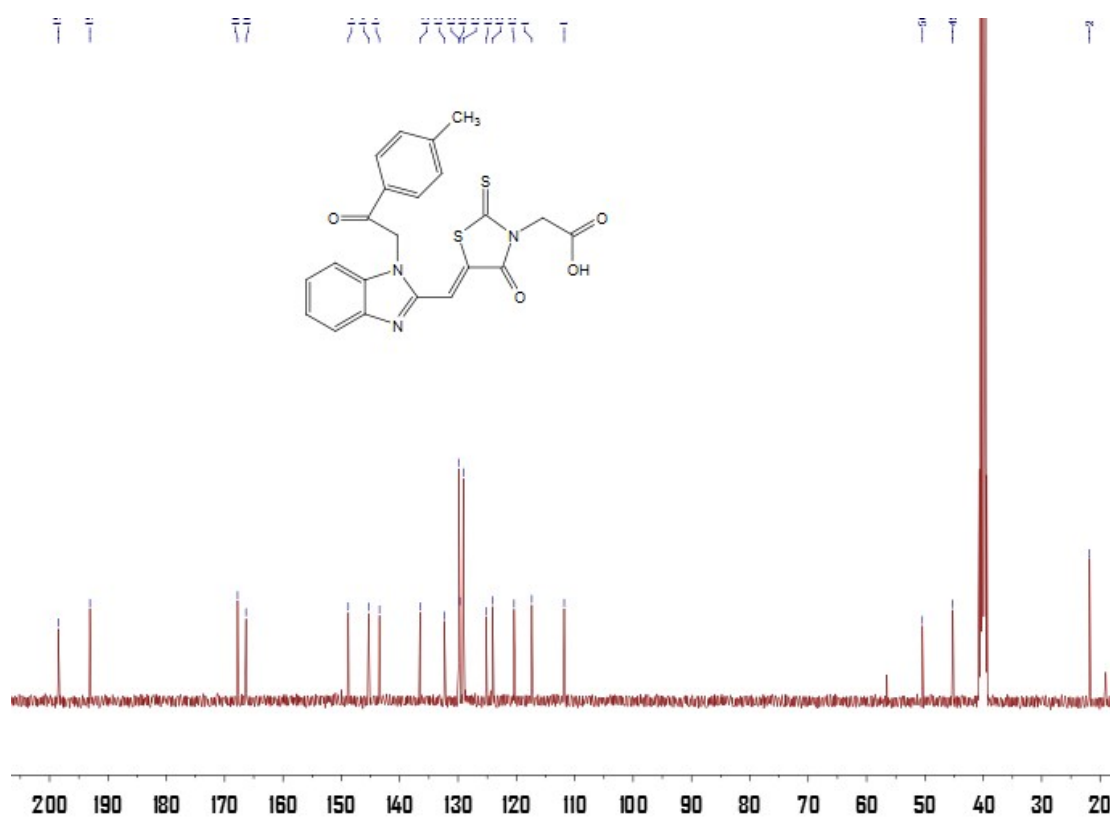

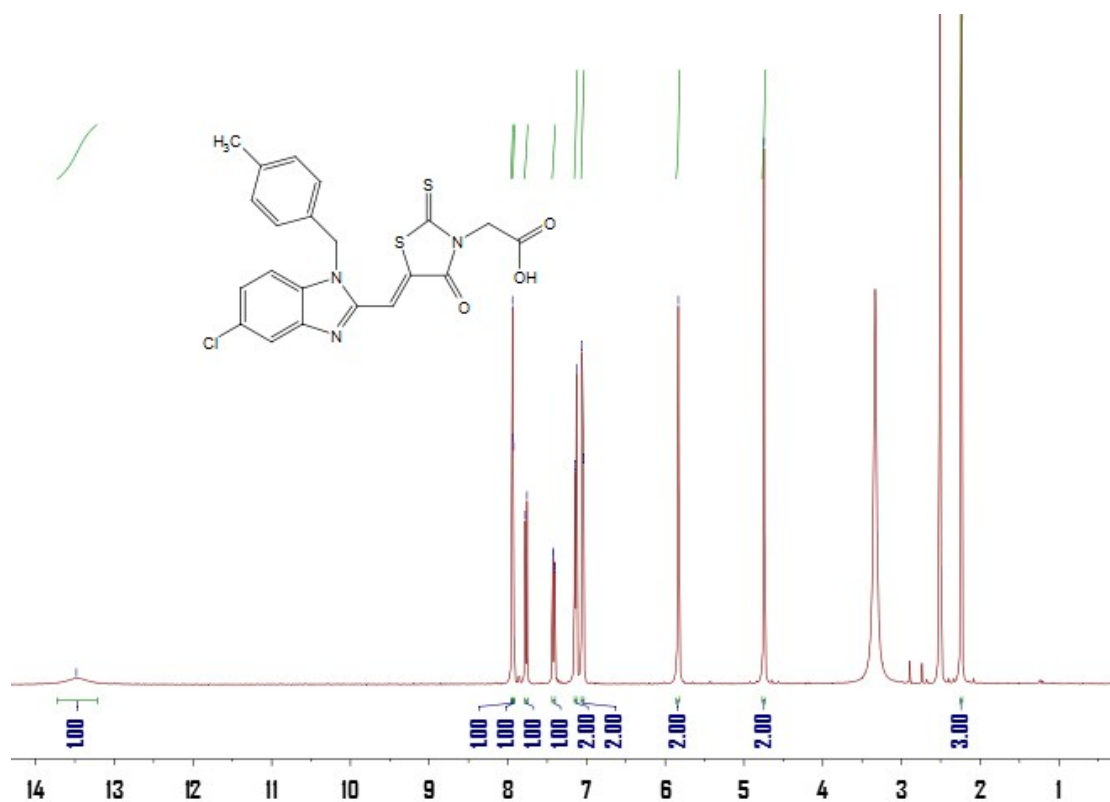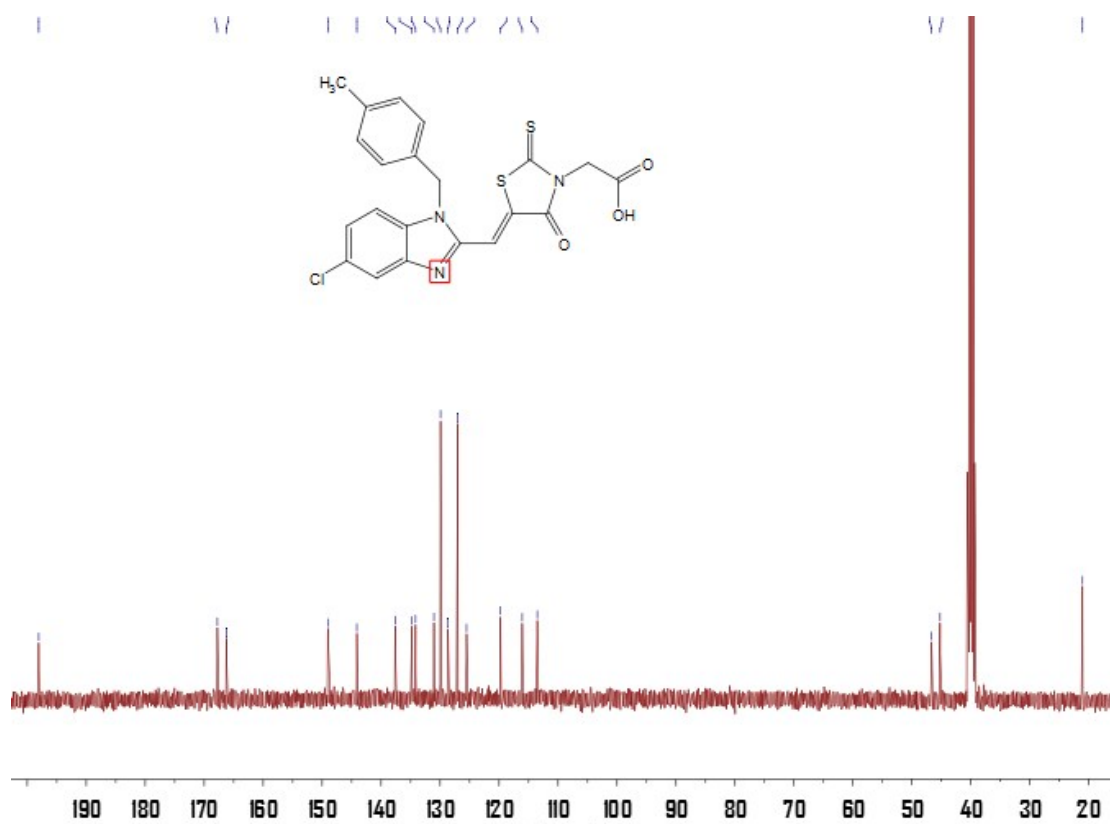

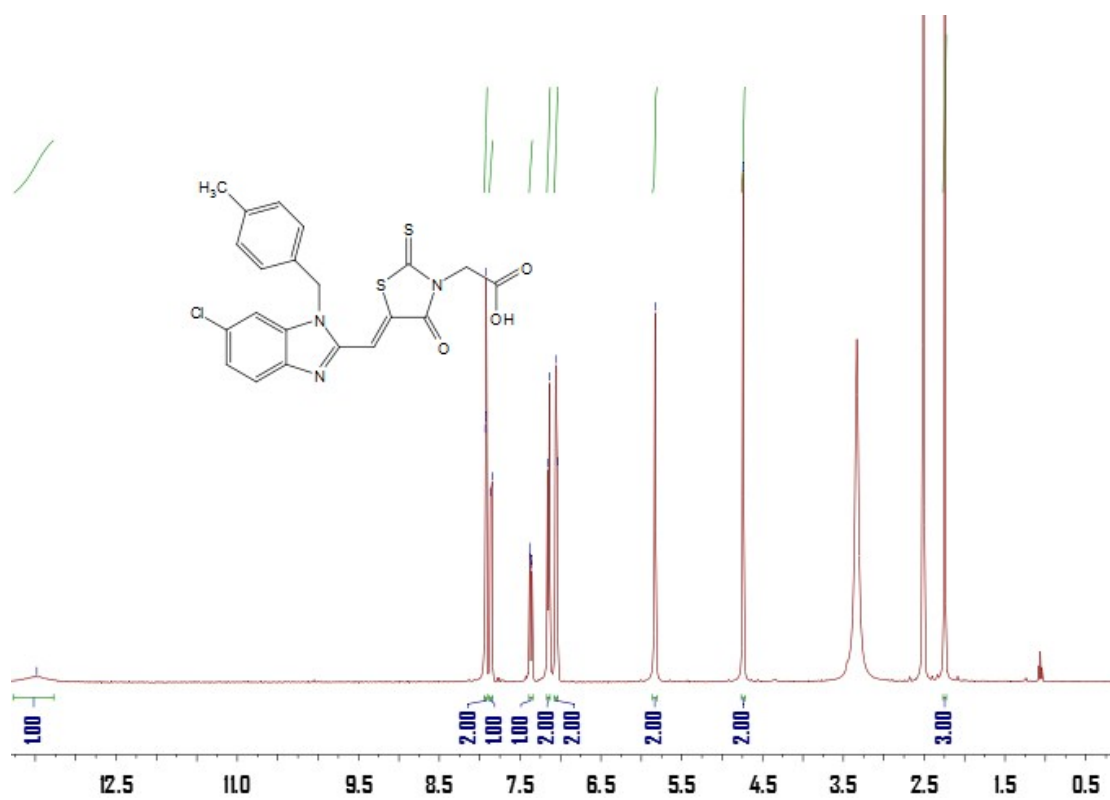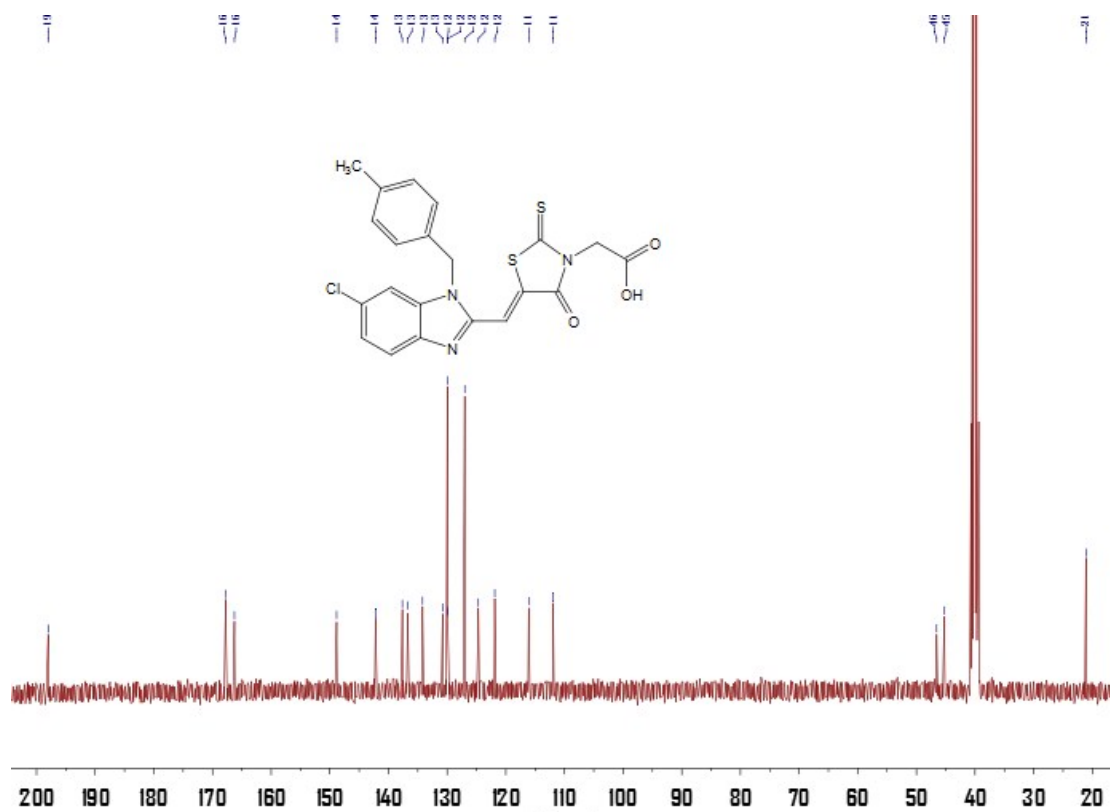

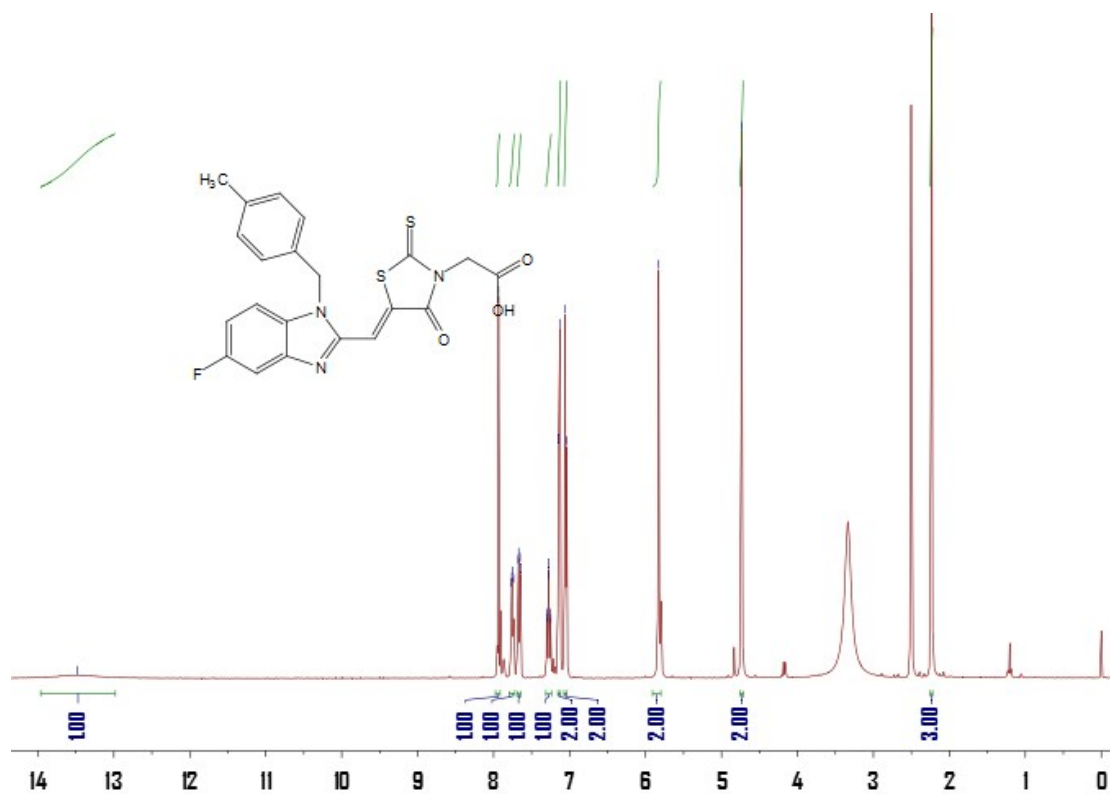

$^1\text{H NMR}$  (400 MHz,  $\text{DMSO-}d_6$ ) spectrum of **10c**

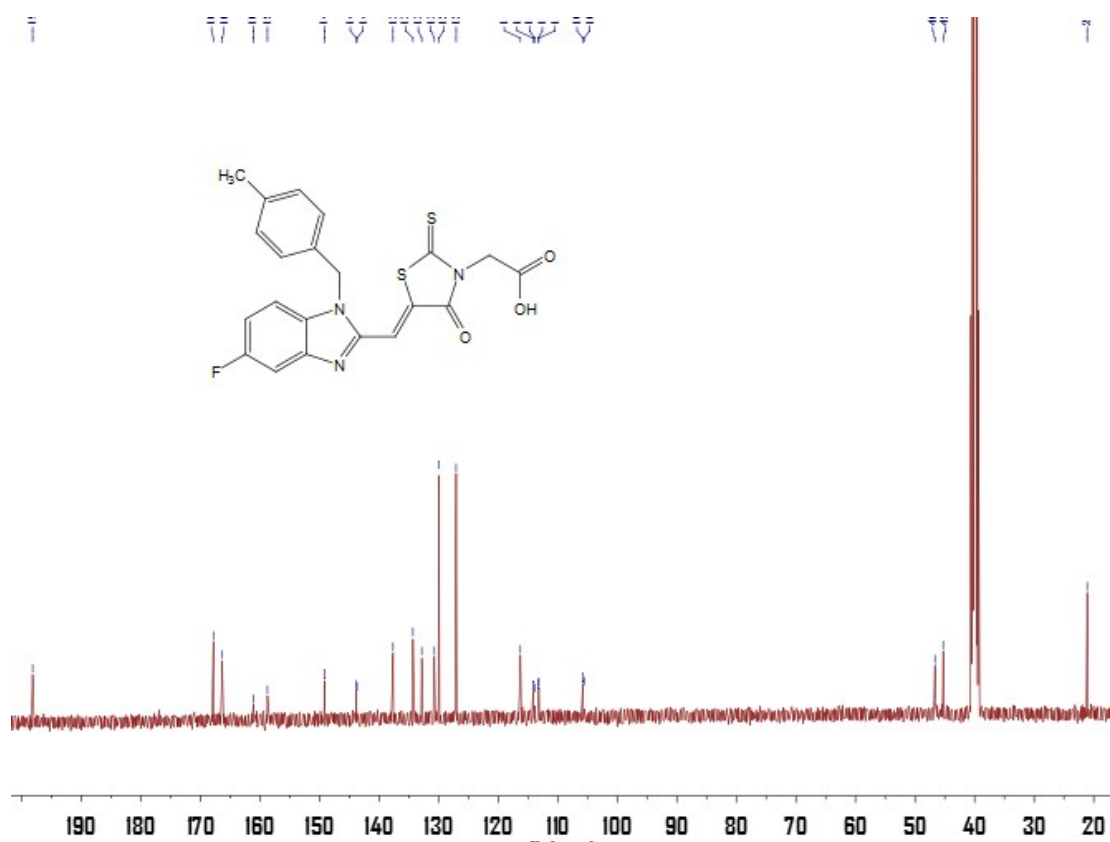

$^{13}\text{C NMR}$  (400 MHz,  $\text{DMSO-}d_6$ ) spectrum of **10c**

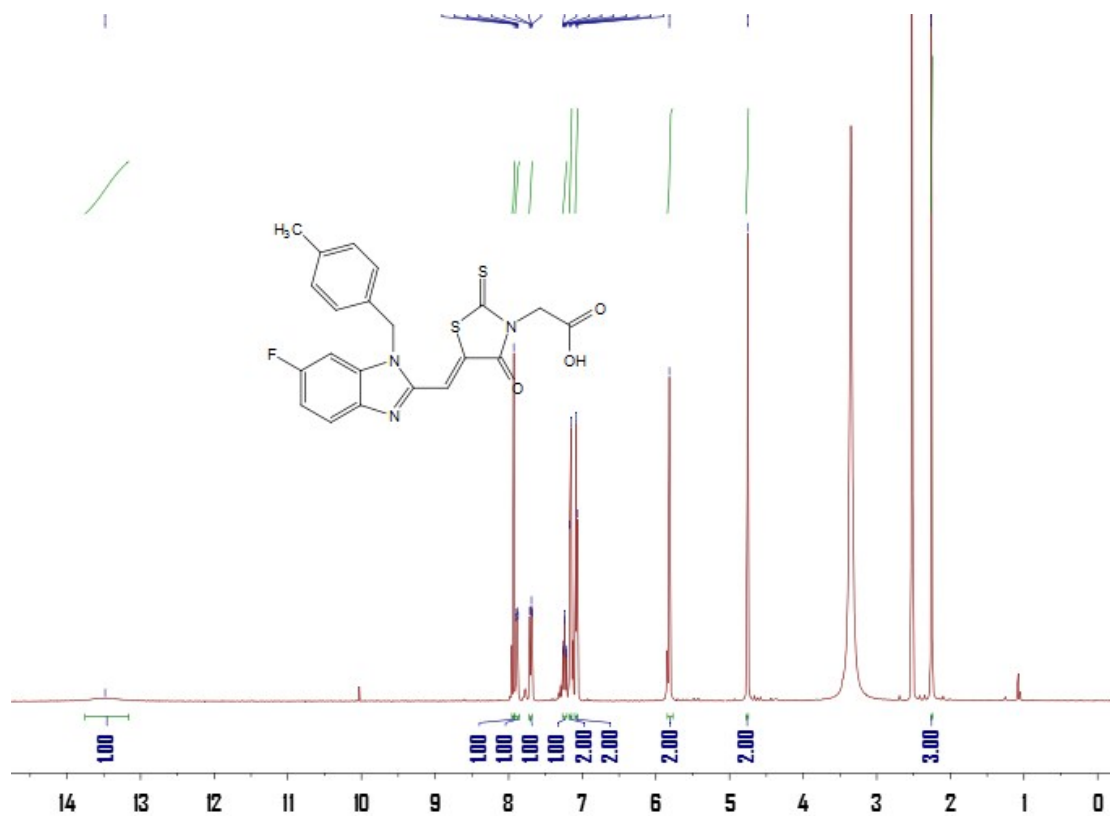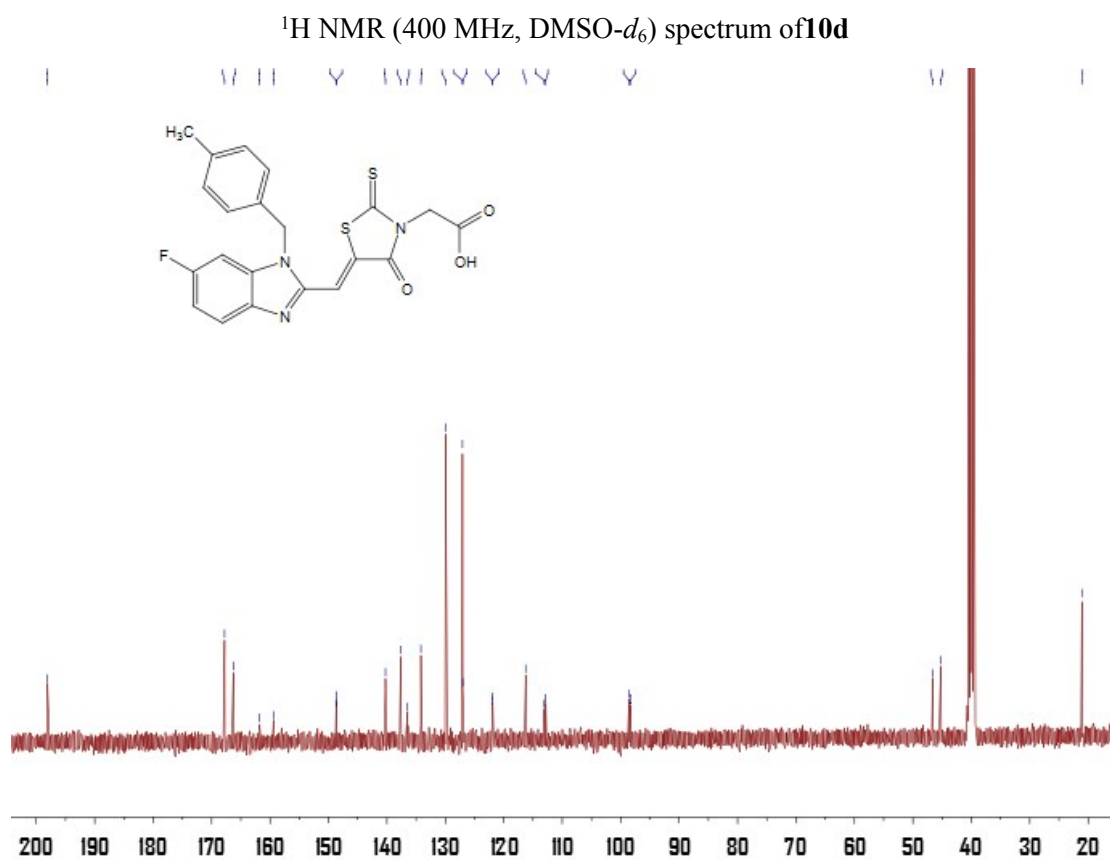



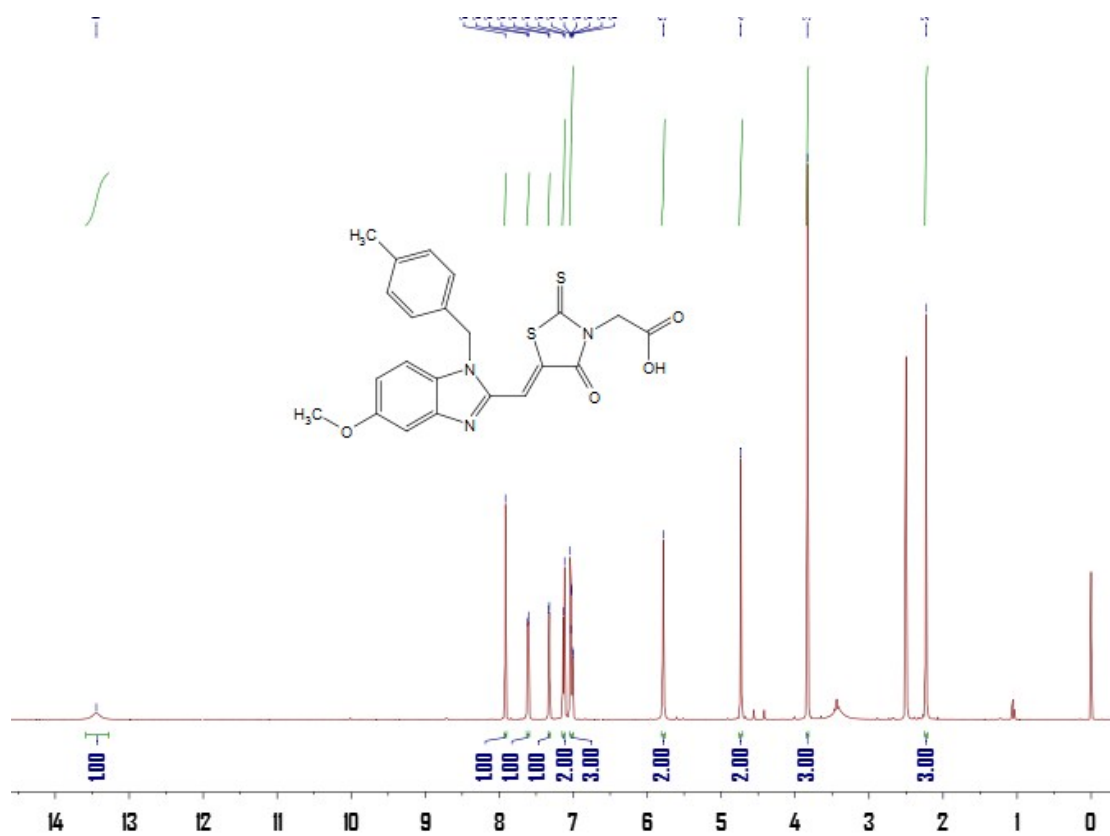

<sup>1</sup>H NMR (400 MHz, DMSO-*d*<sub>6</sub>) spectrum of **10e**

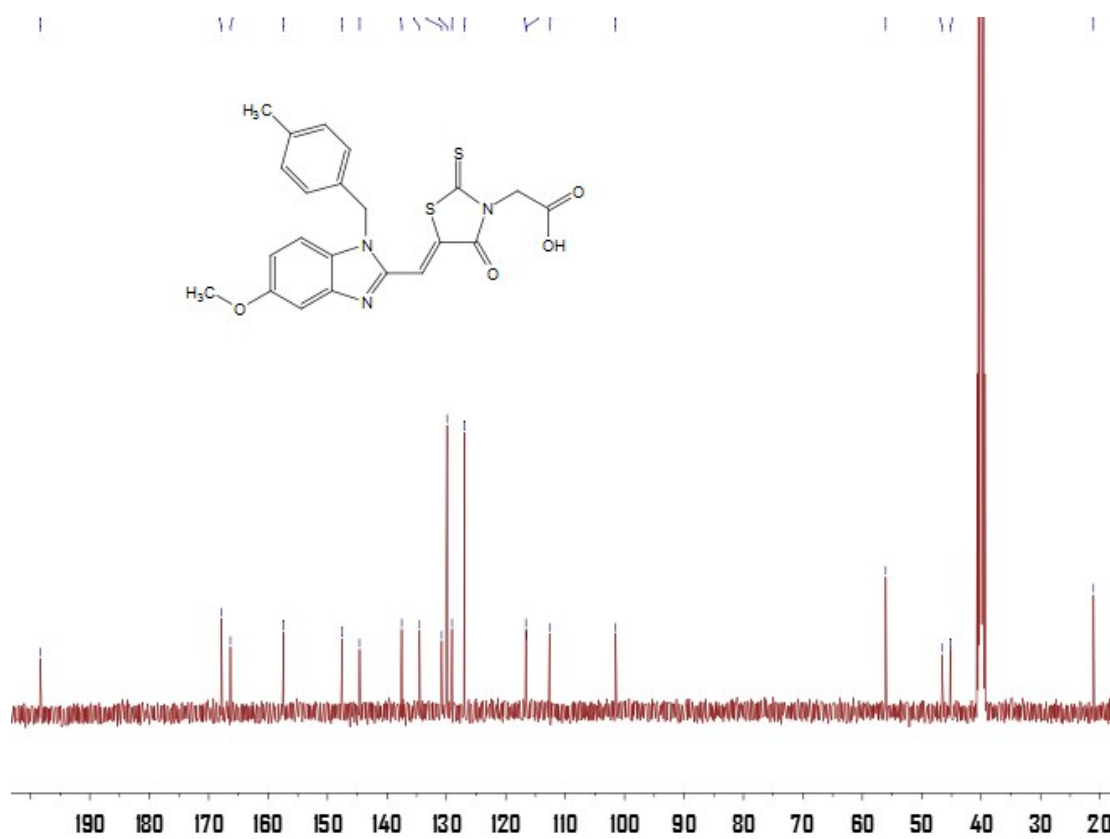

<sup>13</sup>C NMR (400 MHz, DMSO-*d*<sub>6</sub>) spectrum of **10e**

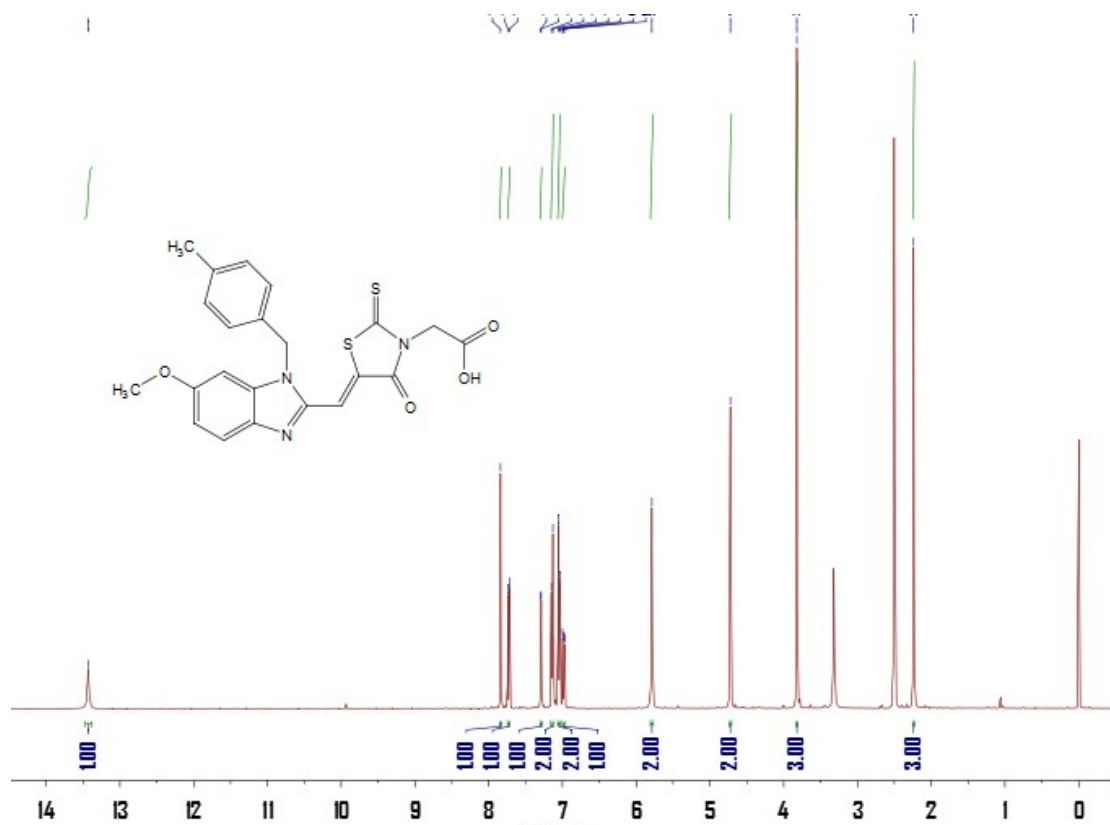

<sup>1</sup>H NMR (400 MHz, DMSO-*d*<sub>6</sub>) spectrum of **10f**

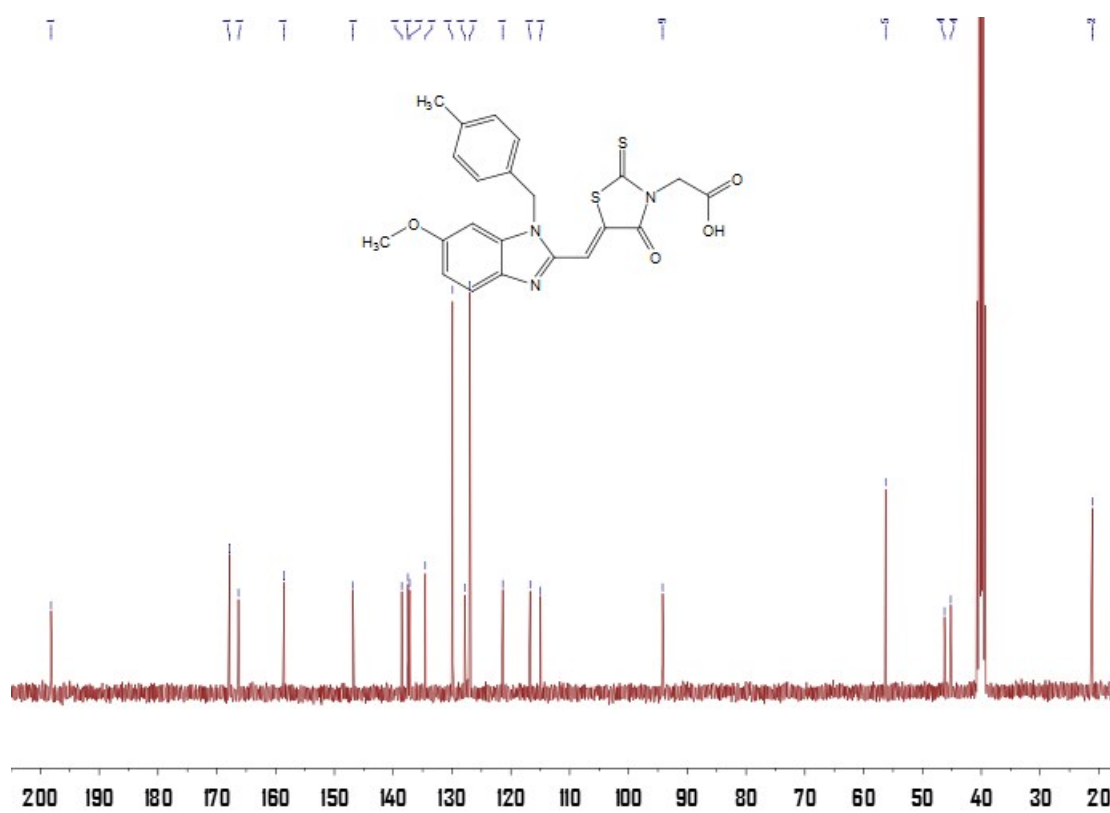

<sup>13</sup>C NMR (400 MHz, DMSO-*d*<sub>6</sub>) spectrum of **10f**

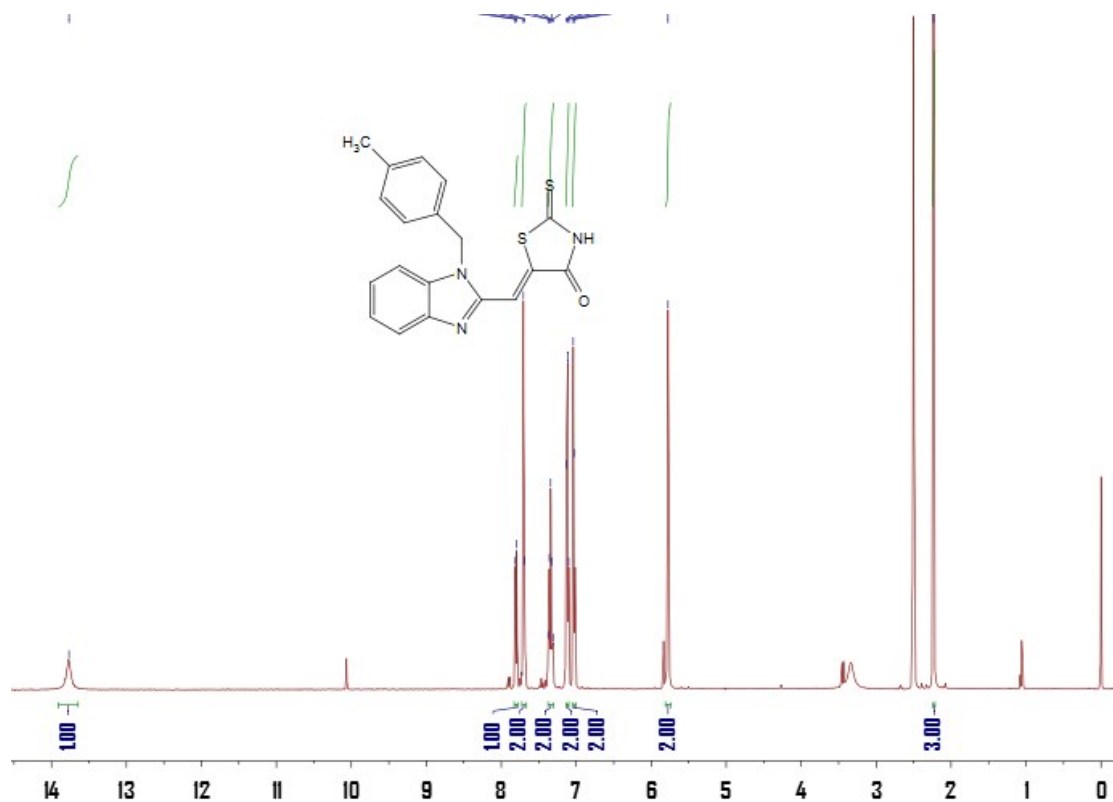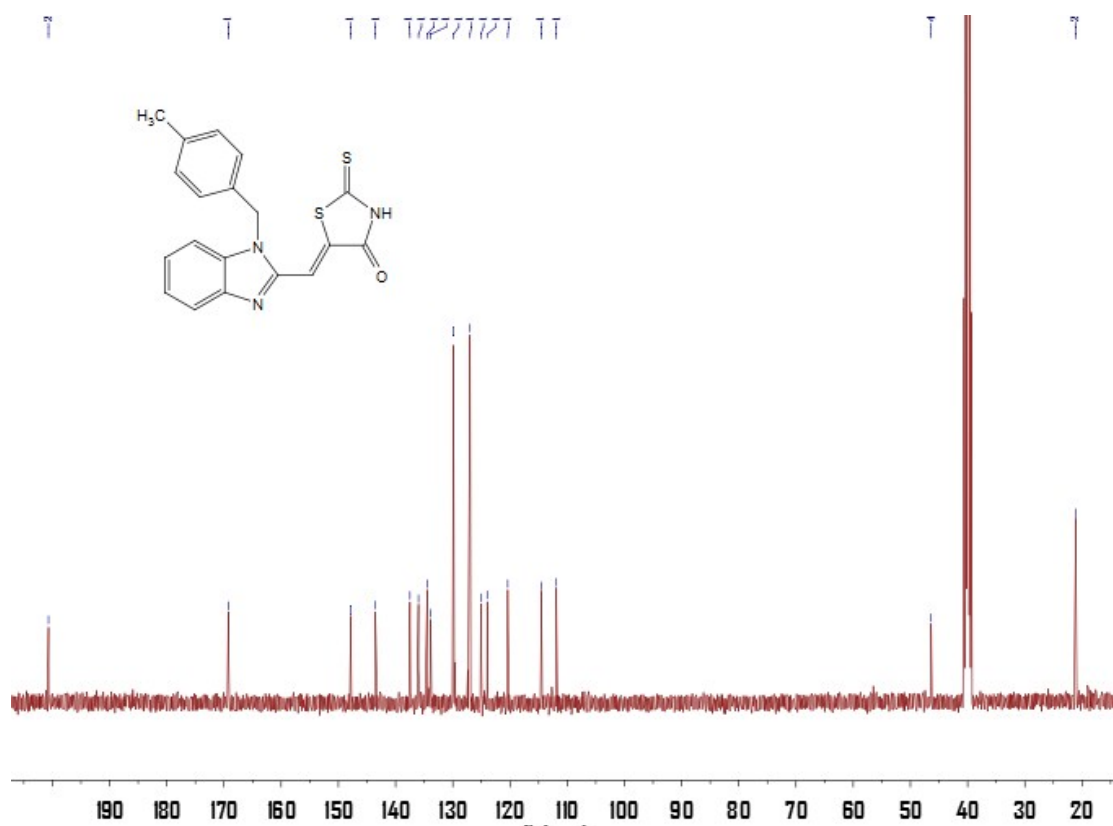

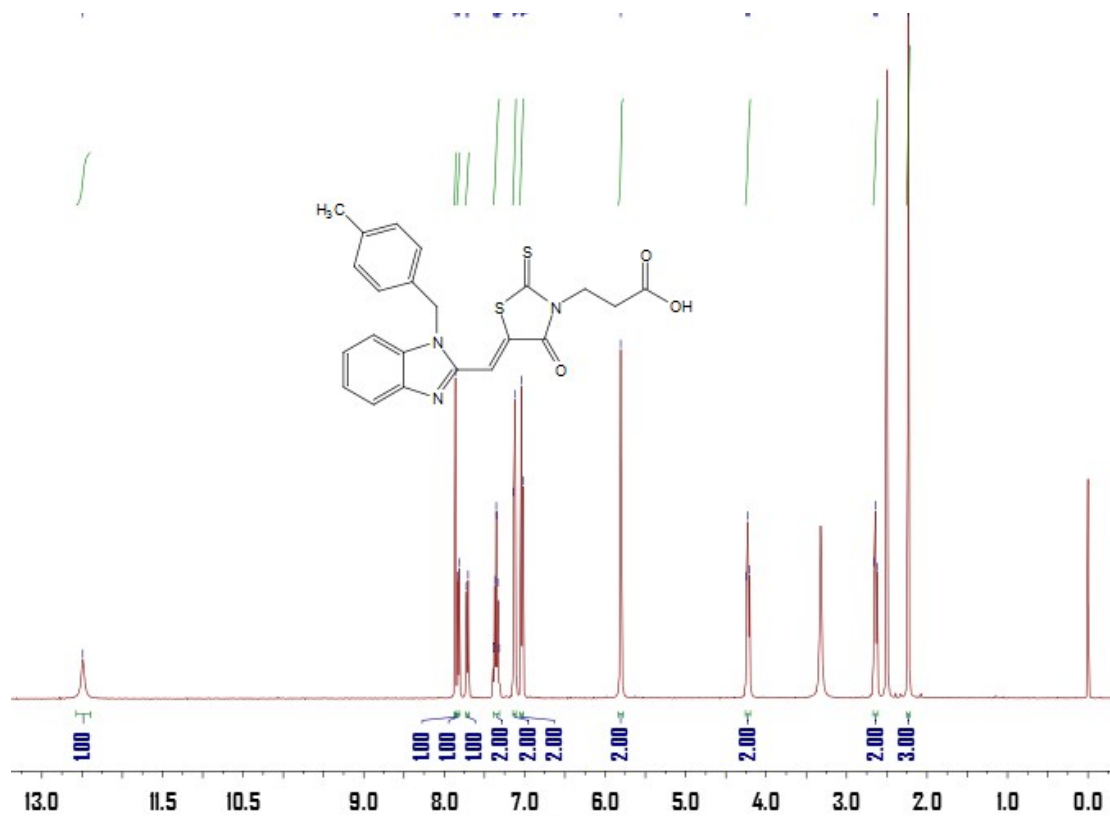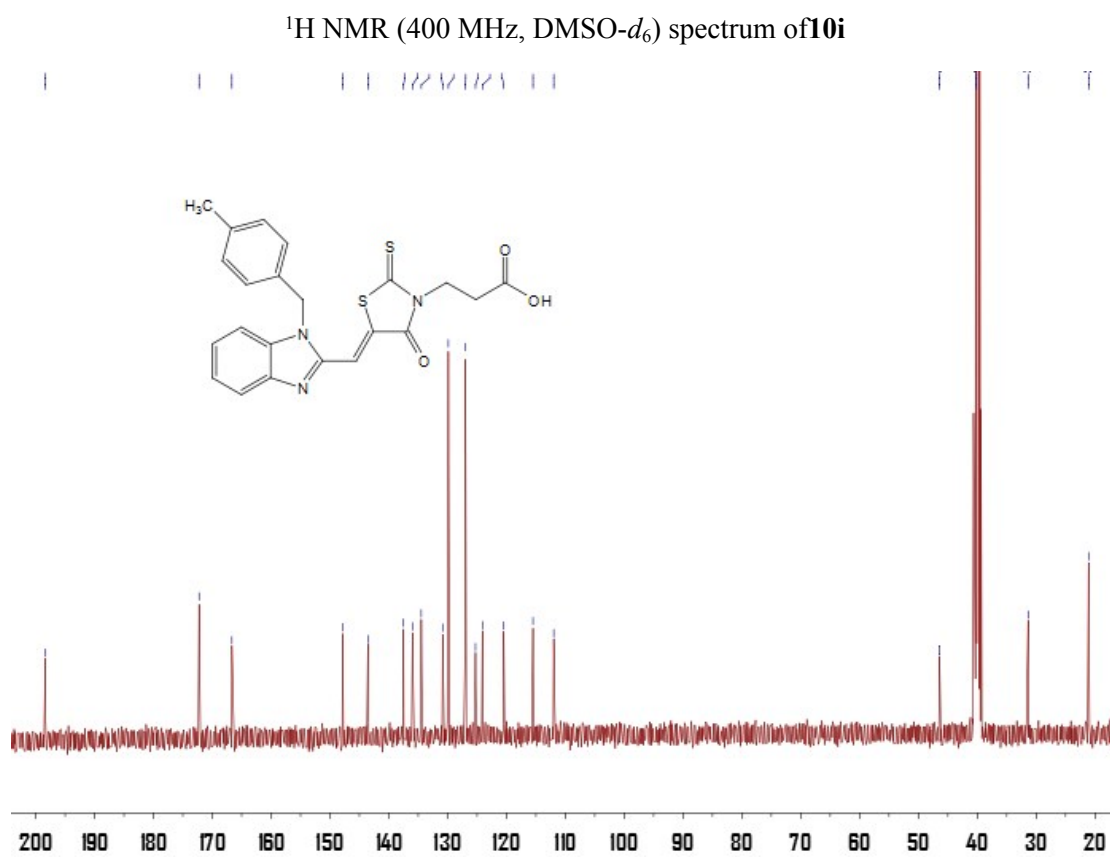

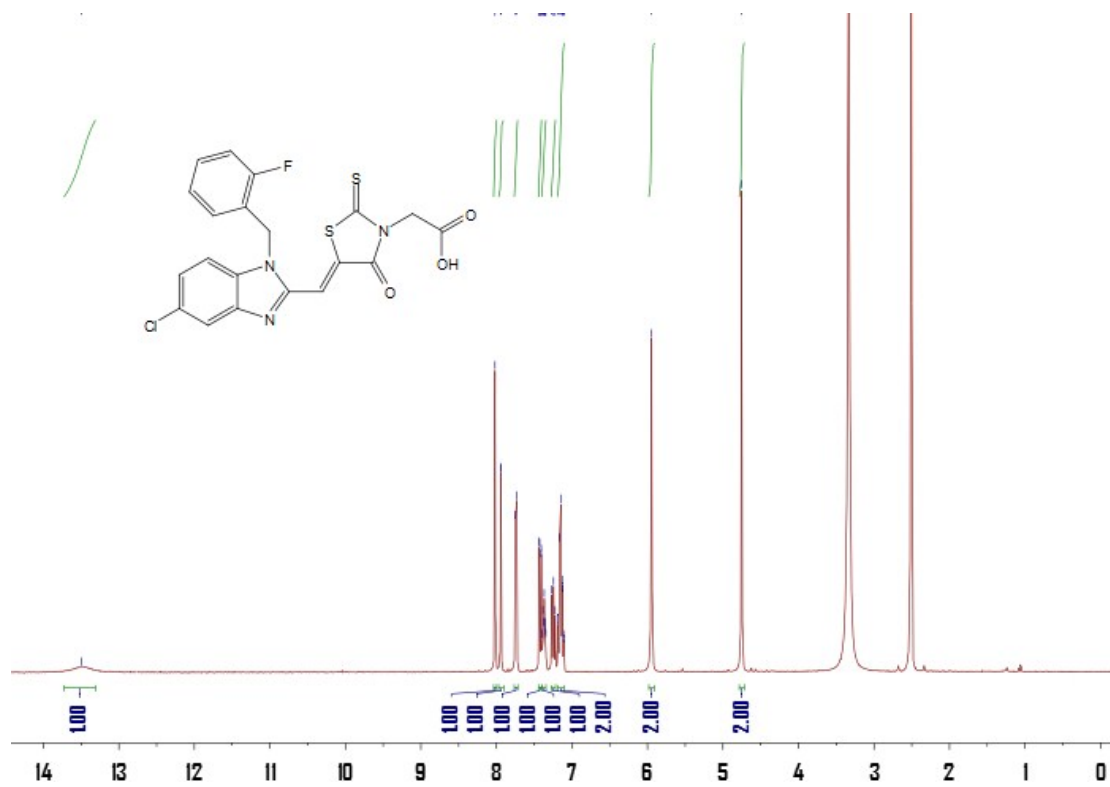

<sup>1</sup>H NMR (400 MHz, DMSO-*d*<sub>6</sub>) spectrum of **11a**

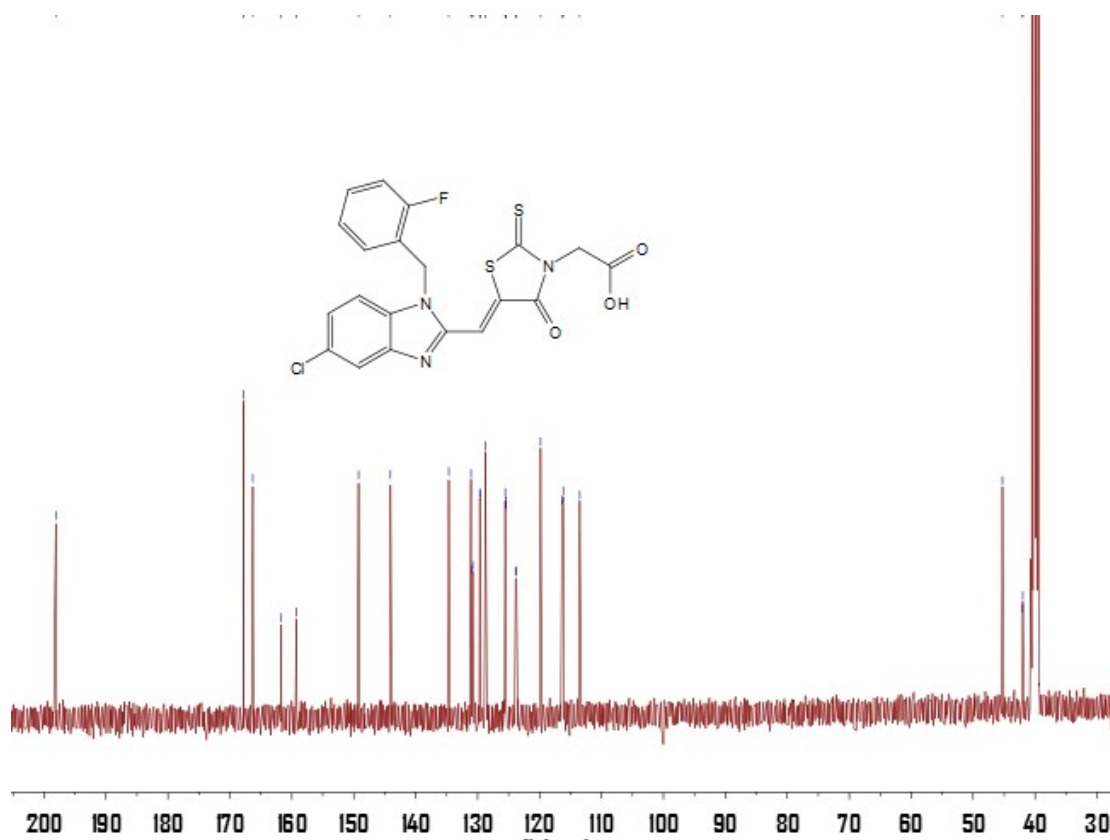

<sup>13</sup>C NMR (400 MHz, DMSO-*d*<sub>6</sub>) spectrum of **11a**

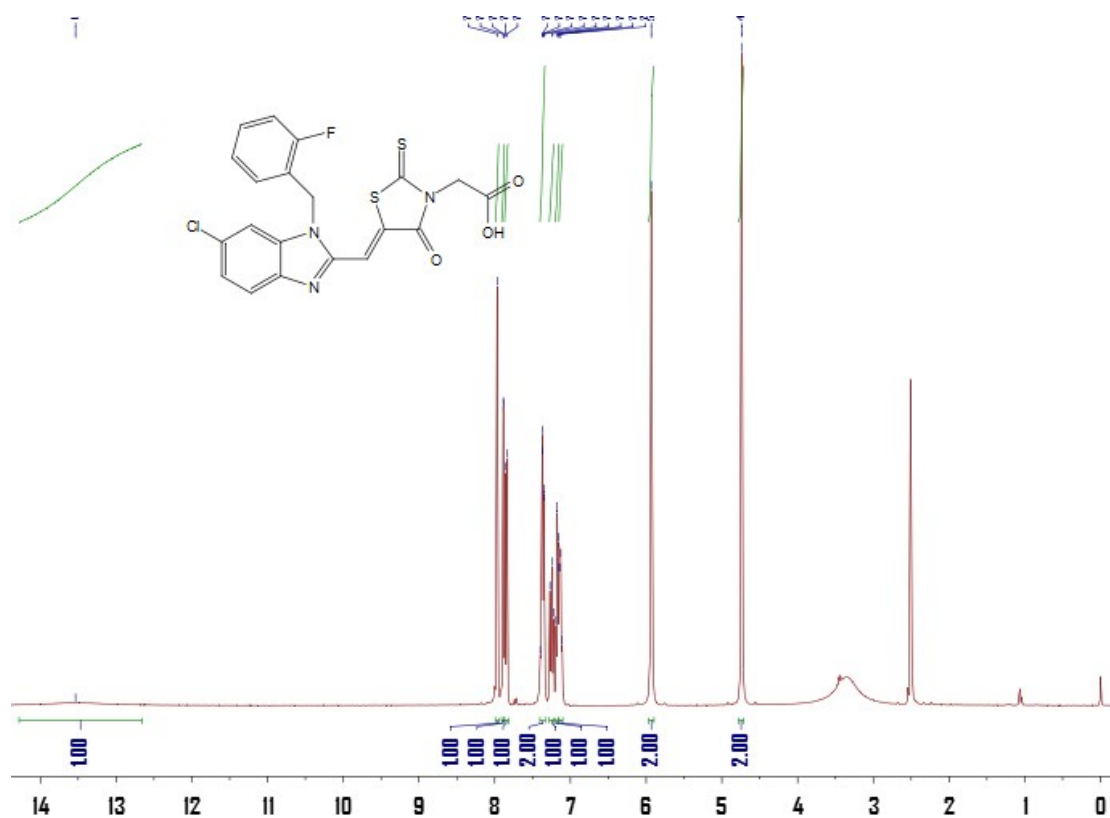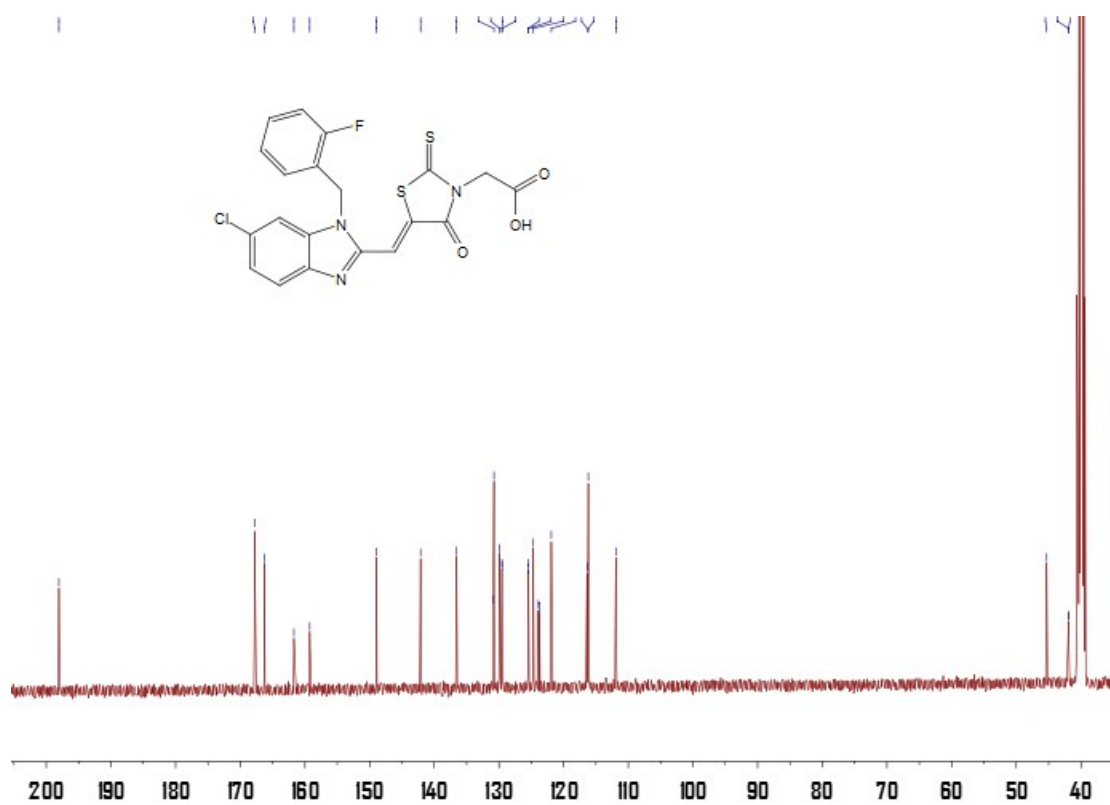

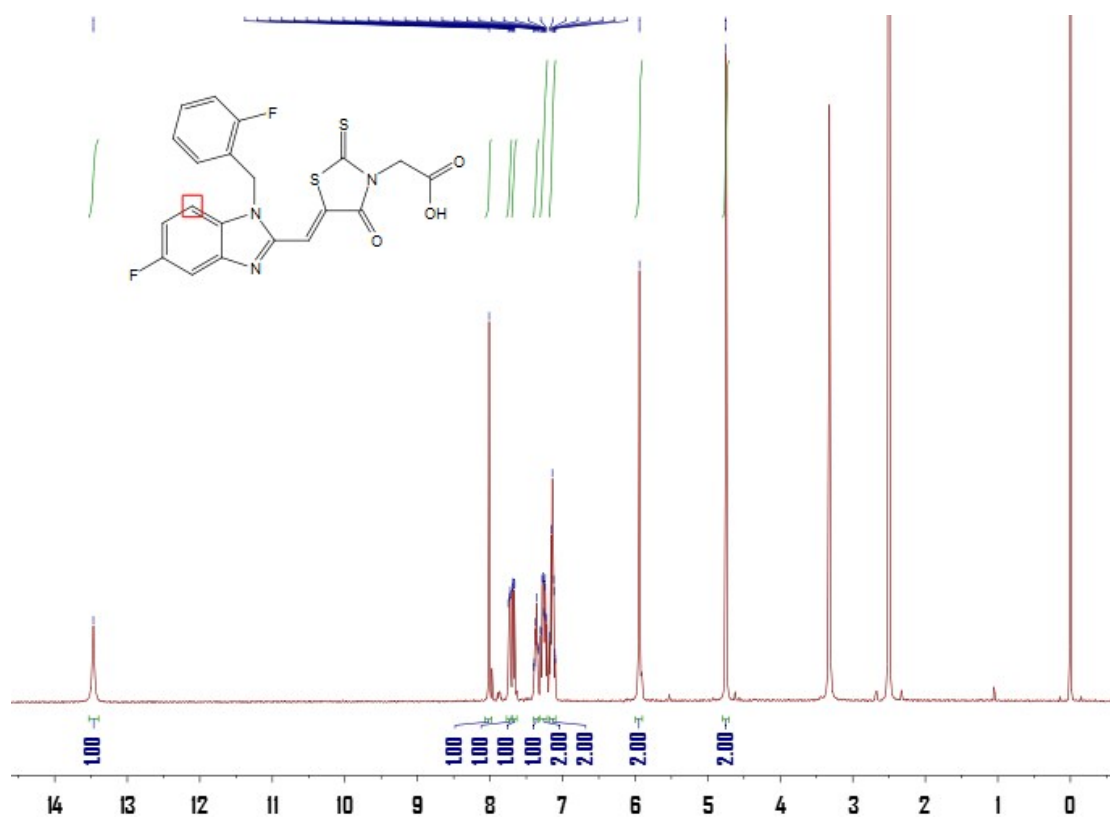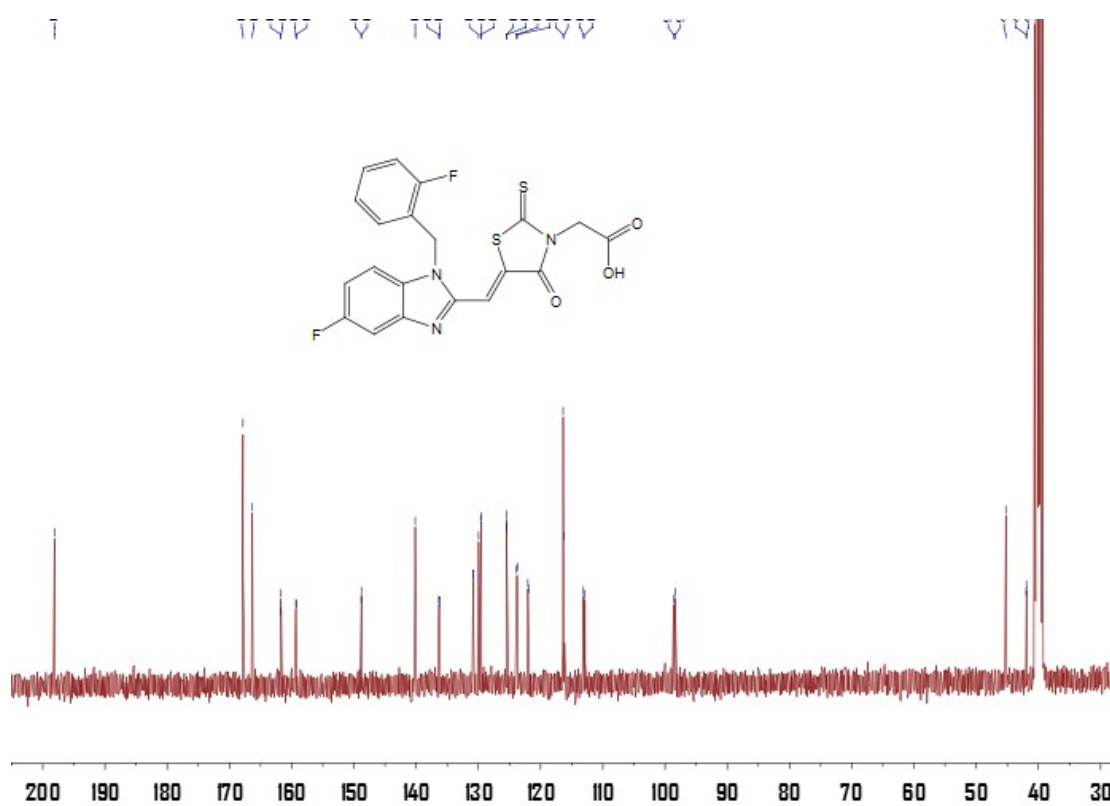

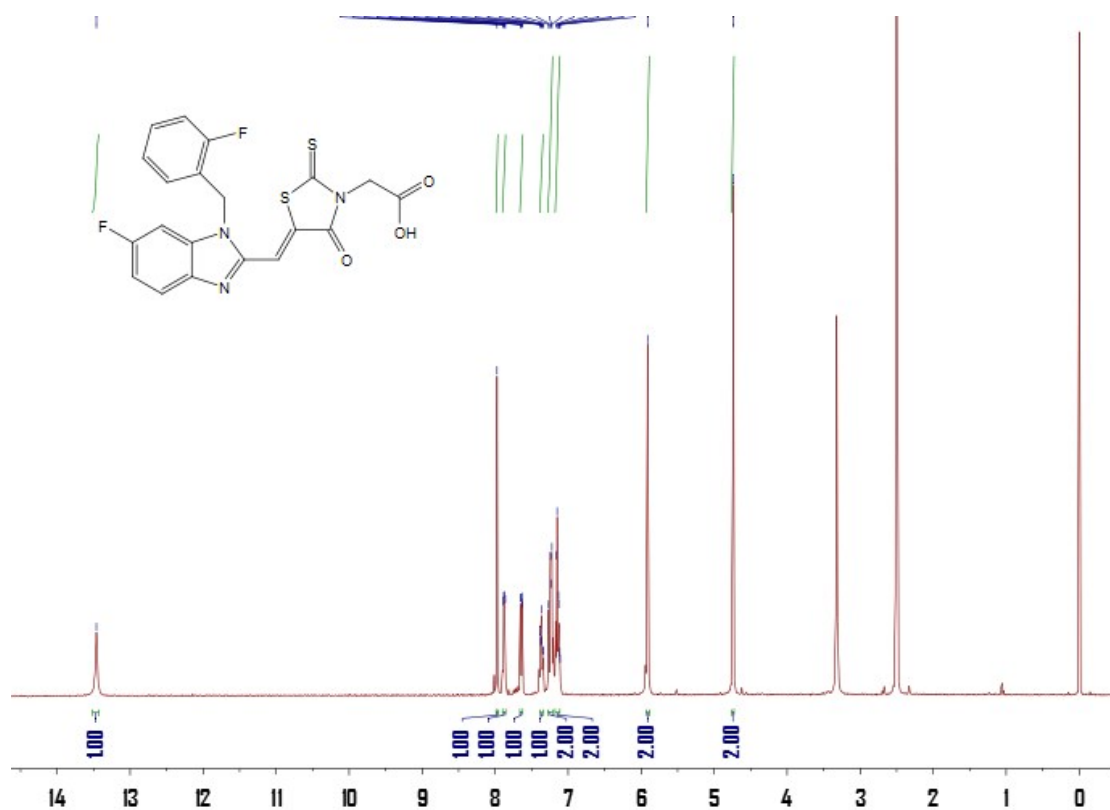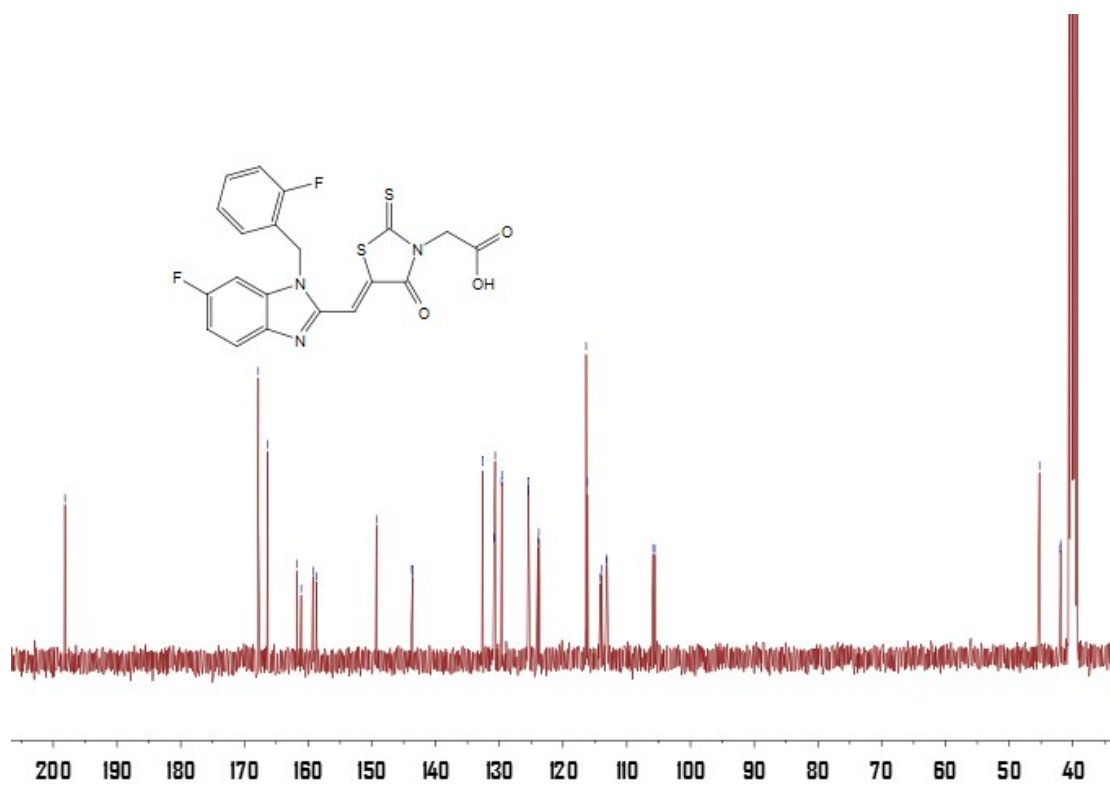



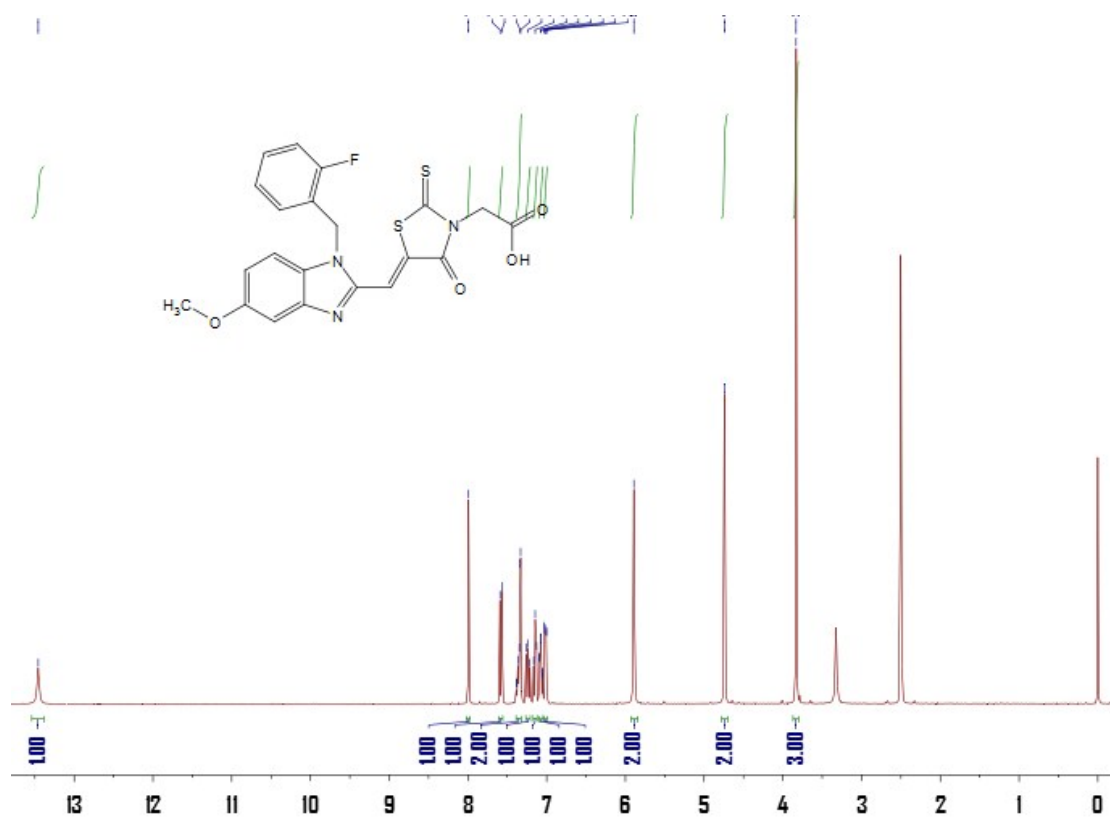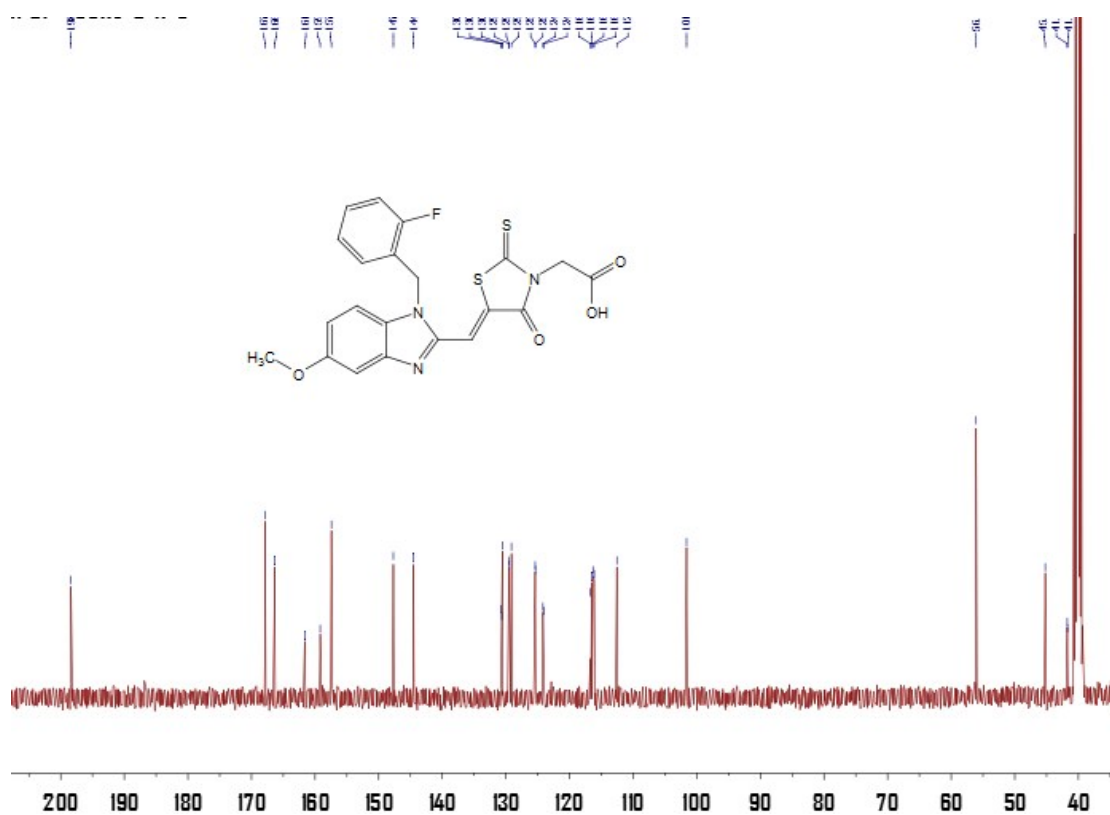

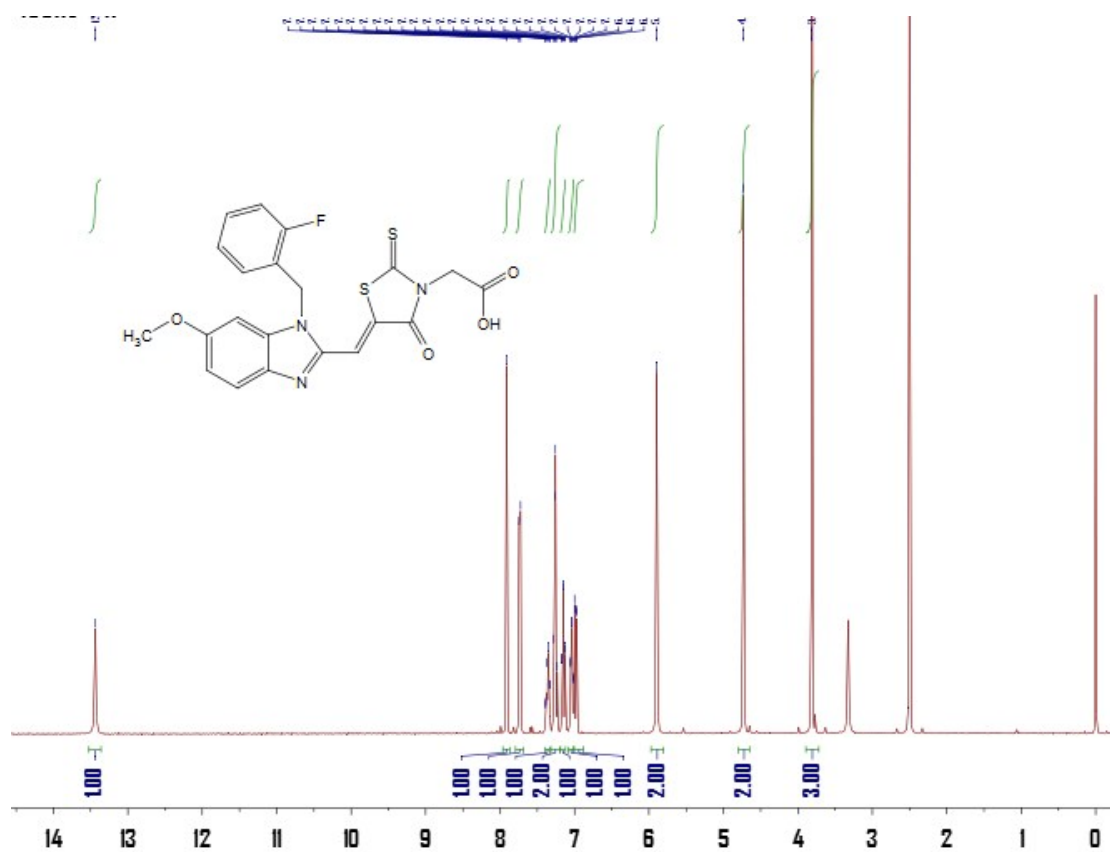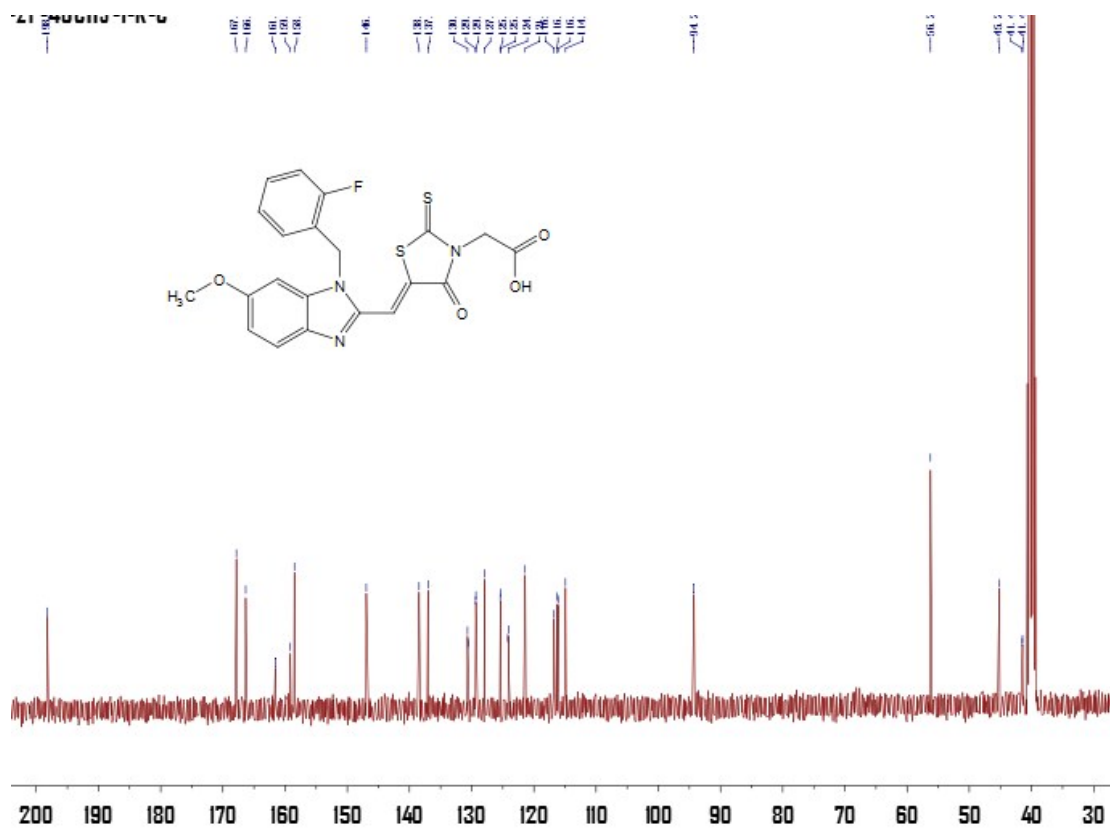

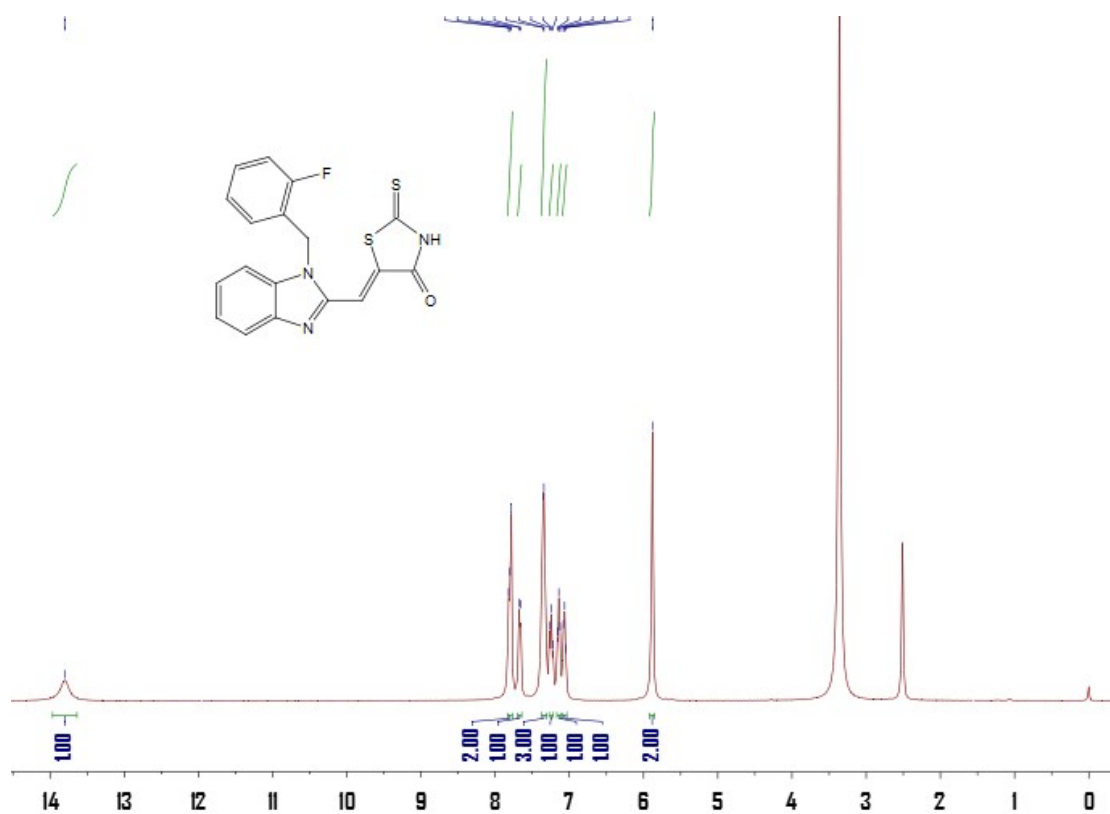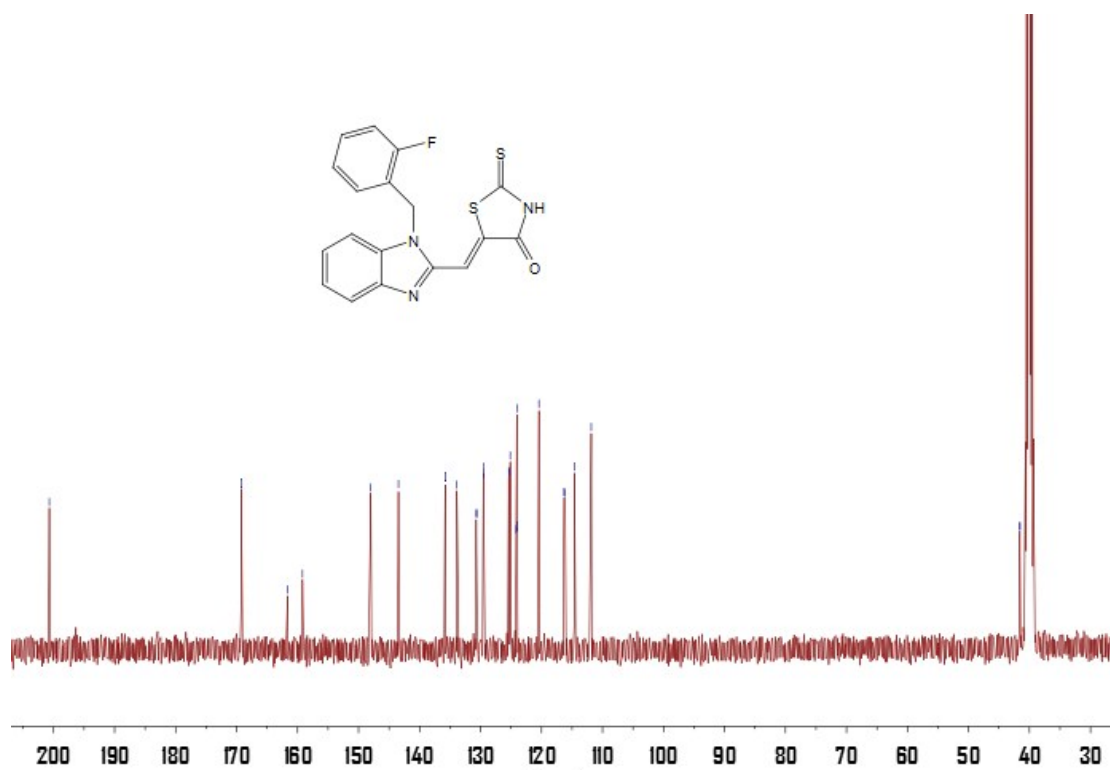

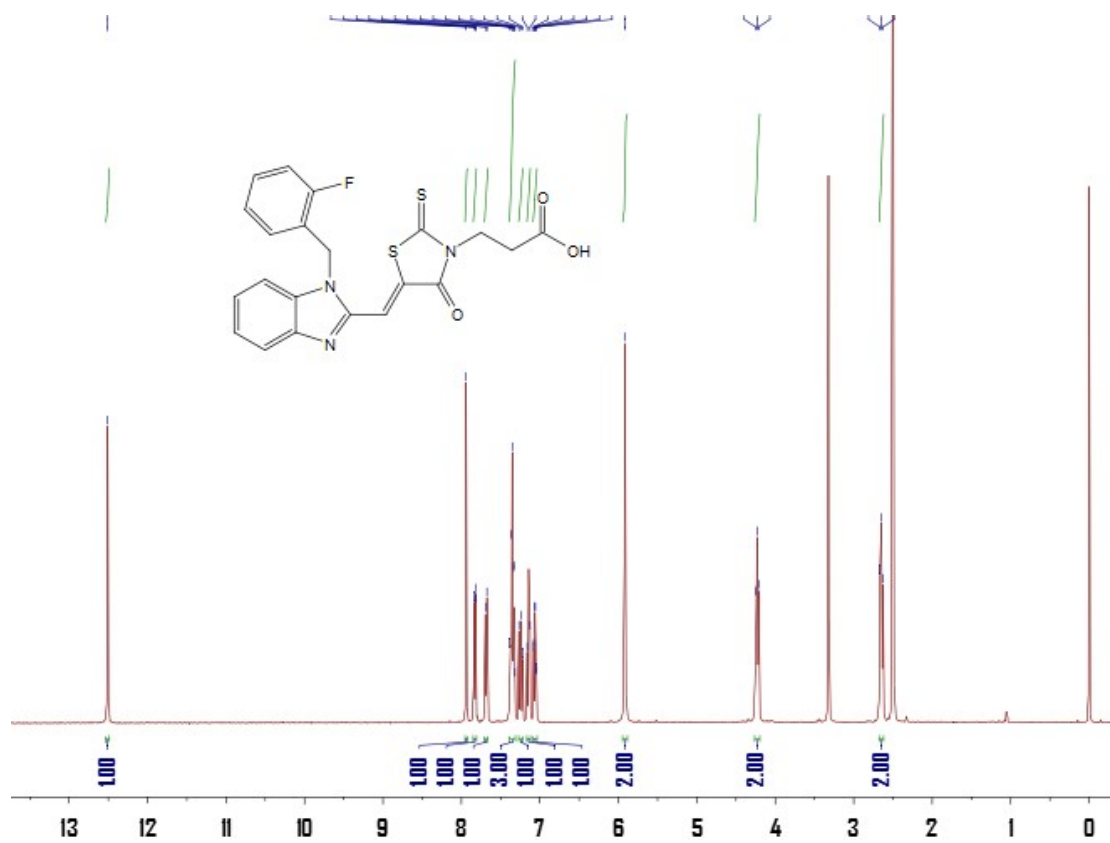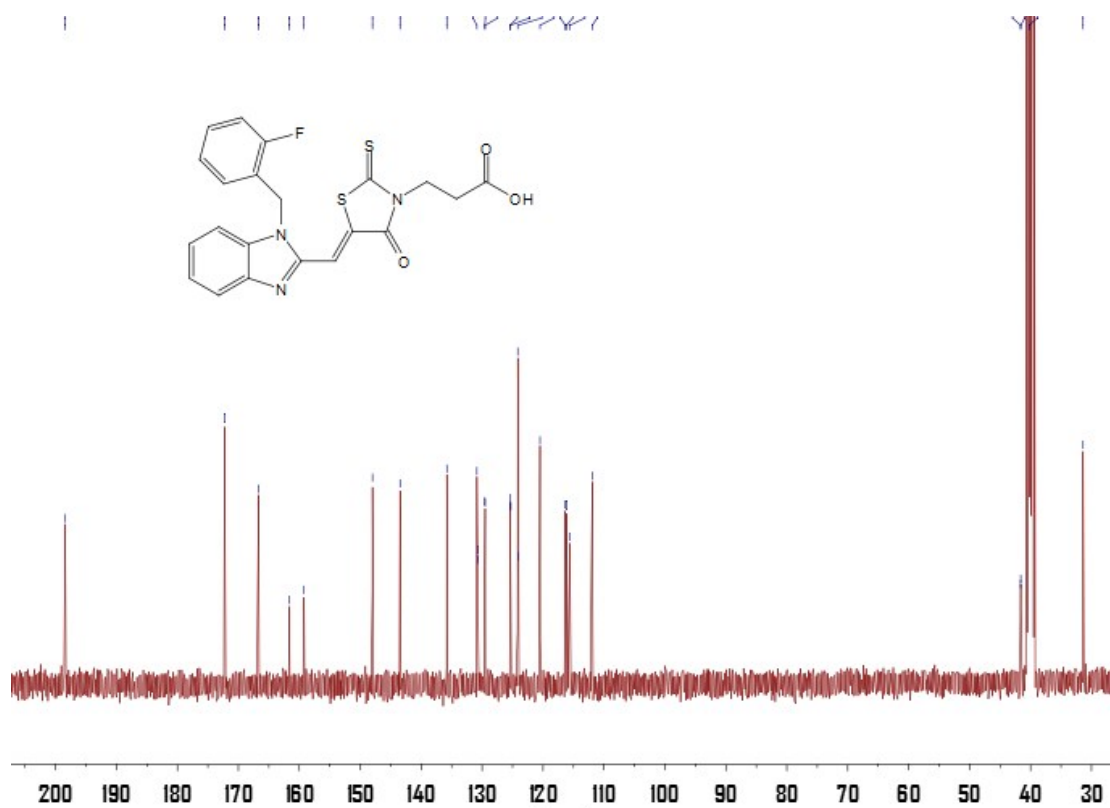

Supplement: MD-009-C8MD00278A-s001.pdf [file MD-009-C8MD00278A-s001.pdf]
